# Supplementary material for: On the Brassard's rule of regioselectivity in Diels–Alder reactions between haloquinones and polar dienes
Source: Royal Society of Chemistry journal article supplement (doi:10.1039/c6ra14073d), 2016-01-01
Supplement: c6ra14073d1.pdf [file c6ra14073d1.pdf]

Electronic Supporting Information for

## **On the Brassard's Rule of regioselectivity in Diels-Alder reactions between haloquinones and polar dienes**

Mauricio Maldonado-Domínguez, Karen Ruiz-Pérez, Oscar González-Antonio, Margarita Romero-Ávila, José Méndez-Stivalet and Blas Flores-Pérez

[<sup>a</sup>] Universidad Nacional Autónoma de México, Facultad de Química, Departamento de Química Orgánica, Ciudad Universitaria, México, D. F., C.P. 04510, México.

\*) Corresponding author's e-mail. blasflop@hotmail.com

| <b>Contents</b>                                                                 | <b>Page</b> |
|---------------------------------------------------------------------------------|-------------|
| Synthetic methodologies and characterization of the featured compounds          | <b>2</b>    |
| NMR spectra of the synthesized compounds                                        | <b>8</b>    |
| AIM analysis of $\pi$ -complexes                                                | <b>16</b>   |
| Sampling of addition routes                                                     | <b>18</b>   |
| DFT energy profiles and intrinsic reaction coordinates (IRCs) for all reactions | <b>19</b>   |
| Global Electron-Density Transfer (GEDT) Indices for Transition States           | <b>31</b>   |
| DFT-optimized coordinates for all species                                       | <b>32</b>   |
| References                                                                      | <b>86</b>   |

### Synthesis of 2-halo-6-methoxy-1,4-benzoquinones Q1-3:

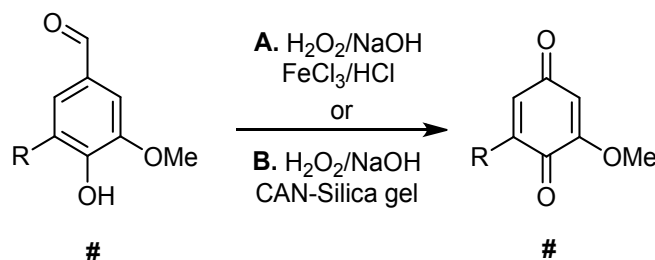

#### Method A. Oxidation with H<sub>2</sub>O<sub>2</sub>/FeCl<sub>3</sub>

A solution of 5-halovanillin (1 mmol) in 4% aqueous NaOH (1.5 mL) was added to a solution of H<sub>2</sub>O<sub>2</sub> (30%, 0.2 mL) in water (1.5 mL). Once reaction was over (20 to 30 min according to TLC monitoring), concentrated HCl (0.37 mL) was added, followed by FeCl<sub>3</sub>·6H<sub>2</sub>O (1.12 mmol) dissolved in a small volume of water.<sup>1</sup> The precipitate was filtered and recrystallized from methanol or purified by chromatography column.

#### Method B. H<sub>2</sub>O<sub>2</sub>/CAN-silica gel

A solution of 5-halovanillin (2 mmol) in 4% aqueous NaOH (3.0 mL) was added to a solution of H<sub>2</sub>O<sub>2</sub> (30%, 0.4 mL) in water (3.0 mL). After the reaction was over, concentrated HCl (0.6 mL) was added and then filtered. Silica-gel supported CAN<sup>2</sup> (2.5 mmol-3 g) was prepared and suspended in 12 mL CH<sub>2</sub>Cl<sub>2</sub>. The solid hydroquinone (1 mmol) was dissolved in 1.25 mL of CH<sub>2</sub>Cl<sub>2</sub> and added to the suspension. After the reaction was over (10 to 20 min according to TLC monitoring), the reaction mixture was filtered through celite and washed with 70 mL CH<sub>2</sub>Cl<sub>2</sub>. The filtrate was dried with anhydrous Na<sub>2</sub>SO<sub>4</sub> and the solvent evaporated.

2-fluoro-6-methoxy-1,4-benzoquinone (**Q1**):

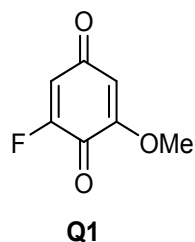

Obtained as a yellow solid and purified by column chromatography over silica gel using *n*-hexane/acetone (9:1), with a yield of 16% (Method **A**) and 28% (Method **B**) after flash chromatography. Recrystallized from acetone. **M.p.** 124.5-125.5; **<sup>1</sup>H NMR** (400 MHz, CDCl<sub>3</sub>). δ(ppm) 6.37 (dd, 1H, J=9.0, 2.3 Hz), 5.93 (d, 1H, J=2.2 Hz), 3.86 (s, 3H); **<sup>13</sup>C NMR** (100 MHz, CDCl<sub>3</sub>) δ(ppm) 185.9 (C-4, C=O), 174.4 (C-1, C=O), 160.2 (C-F), 157.7 (C-6, C-O), 115.2 (C-3), 107.8 (C-5), 56.99 (OCH<sub>3</sub>) ppm; **<sup>19</sup>F NMR** (282 MHz, CDCl<sub>3</sub>) δ(ppm) -116.32 ppm; **GC-MS**: m/z 156 (M<sup>+</sup>); **IR (ATR)**. ν(cm<sup>-1</sup>)= 1784, 1699, 1660, 1629, 1601, 1458, 1441, 1392, 1376; **Elem. Anal.**: Calculated for C<sub>7</sub>H<sub>5</sub>FO<sub>3</sub>: C: 53.86; H: 3.23; F: 12.17; O: 30.75; found: C, 53.90; H, 2.95.

2-chloro-6-methoxy-1,4-benzoquinone (**Q2**):

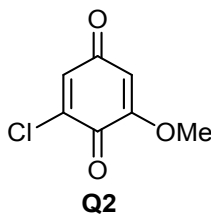

Obtained as a yellow solid and purified by column chromatography over silica gel using CH<sub>2</sub>Cl<sub>2</sub>/MeOH (9:1), with a yield of 50% (for Method **A**) and 92 % (for Method **B**) after flash chromatography. **m.p.** 158.9-159.9 °C (MeOH) (lit.<sup>5</sup> m.p. = 155-157 °C); **<sup>1</sup>H NMR** (300 MHz, CDCl<sub>3</sub>) δ 6.91 (d, 1H, J=2.3 Hz, H-3), 5.95 (d, 1H, J=2.2 Hz, H-5), 3.84 (s, 3H, OCH<sub>3</sub>) ppm; **<sup>13</sup>C NMR** (75 MHz, CDCl<sub>3</sub>) δ 184.67 (C-4, C=O), 174.71 (C-1, C=O), 158.76 (C-6), 141.67 (C-Cl), 133.07 (C-3), 107.79 (C-5), 56.25 (OCH<sub>3</sub>) ppm.

2-bromo-6-methoxy-1,4-benzoquinone (**Q3**):

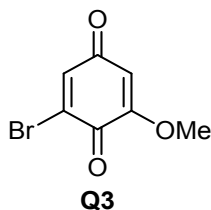

Obtained as a yellow-orange solid and purified by column chromatography over silica gel using CH<sub>2</sub>Cl<sub>2</sub>/MeOH (9:1), with a yield of 59% (for Method **A**) and 95 % (for Method **B**) after flash chromatography. **M.p** 162.0-163.0 °C (MeOH) (lit.<sup>1</sup> m.p. = 161-162 °C); **<sup>1</sup>H NMR** (300 MHz, CDCl<sub>3</sub>) δ 7.21 (d, 1H, *J*=2.3 Hz, H-3) 5.96 (d, 1H *J*=2.2 Hz, H-5), 3.85 (s, 3-H, OCH<sub>3</sub>) ppm. **<sup>13</sup>C NMR** (75 MHz, CDCl<sub>3</sub>) δ 184.35 (C-4, C=O), 174.26 (C-1, C=O), 157.99 (C-6), 138.21 (C-3), 134.00 (C-Br), 107.36 (C-5), 56.53 (OCH<sub>3</sub>) ppm.

**Synthesis of 2-iodo-6-methoxy-1,4-benzoquinone(Q4):**

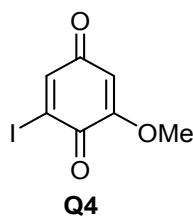

NaI (416 mg, 2.77mmol) was added to a solution of **Q3** (500 mg, 2.31 mmol) in glacial acetic acid (40 mL), the mixture was stirred at a temperature between 50-60 ° C (under nitrogen and protected from light). After 3 days a second addition of NaI (416 mg, 2.77 mmol) was made under the same conditions. The reaction was cooled and the solvent was evaporated. The residue was dissolved in CH<sub>2</sub>Cl<sub>2</sub> (50 mL) and washed with water (2 x 25 mL). The aqueous phases were combined and extracted with CH<sub>2</sub>Cl<sub>2</sub> (2 x 25 mL). The organic phases were combined and washed with a saturated NaHCO<sub>3</sub> solution (1 x 150 mL), a solution of 10% Na<sub>2</sub>S<sub>2</sub>O<sub>3</sub> (1 x 30 mL) and a saturated NaCl solution (1 x 150 mL), dried with anhydrous Na<sub>2</sub>SO<sub>4</sub> and evaporated. The residue was purified by flash chromatography eluted with a hexane:acetone (9:1) system. The product obtained had a 2<sub>I</sub> :1<sub>Br</sub> proportion according to <sup>1</sup>H NMR and was obtained as a reddish

yellow solid. **M.p.:** 146.1-146.7 °C (Acetone). **<sup>1</sup>H NMR** (400 MHz, CDCl<sub>3</sub>) δ(ppm) 7.55 (d, 1H, J=2.3 Hz, H-3), 5.96 (d, 1H J=2.07 Hz, H-5), 3.84 (s, 3H, OCH<sub>3</sub>). **<sup>13</sup>C NMR** (100 MHz, CDCl<sub>3</sub>) δ(ppm) 185.03 (C-4, C=O), 175.60 (C-1, C=O), 157.01 (C-6), 146.81 (C-3), 115.16 (C-1), 107.79 (C-5), 56.82 (OCH<sub>3</sub>); **GC-MS:** m/z 264 (M<sup>+</sup>).

**Procedure for the synthesis of Brassard's diene:**

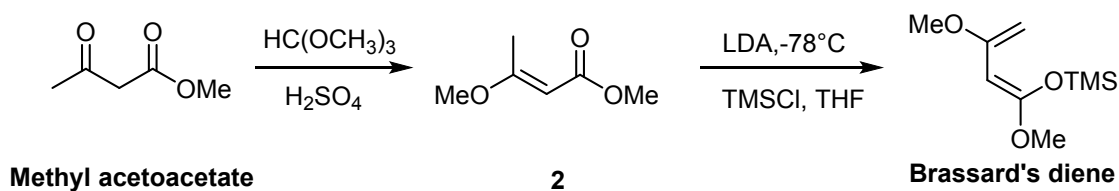

**(E)-3-Methoxy-2-butenoic acid methyl ester (2):** A solution of methyl acetoacetate (10.7 g, 92.6 mmol) and trimethyl orthoformate (9.8 g, 92.6 mmol) was cooled to 0°C, and concentrated H<sub>2</sub>SO<sub>4</sub> (0.16 mL) was added dropwise. The solution was stirred at room temperature for 24 h, filtered over K<sub>2</sub>CO<sub>3</sub> and distilled under reduced pressure (100 ° C, 80 mmHg) affording ester **2** (8.4 g, 70%)<sup>4</sup> as a colorless oil. **<sup>1</sup>H NMR** (300 MHz, CDCl<sub>3</sub>) δ(ppm): 5.01 (s, 1-H), 3.66 (s, 3-H), 3.62 (s, 3-H), 2.28 (s, 3-H). **<sup>13</sup>C NMR** (75 MHz, CDCl<sub>3</sub>) δ(ppm): 173.39 (C-3), 168.45 (C=O), 90.57 (C-2), 55.52 (O-CH<sub>3</sub>), 50.88 (OCH<sub>3</sub>), 19.01 (CH<sub>3</sub>).

**(Z)-1,3-dimethoxy-1-[(trimethylsilyl)oxi]-1,3-butadiene (Brassard's diene):** A solution of diisopropylamine (8.5 mL, 60.6 mmol) in anhydrous THF (50 mL) was cooled to -78 °C under nitrogen, and *n*-butyllithium (2.1M in hexane, 28 mL, 59 mmol) was added dropwise over 10 min. The yellow solution was stirred for 30 min. Ester **2** (5.85 g, 44 mmol) was added slowly to the solution, and kept at -78°C for 30 min more. Freshly distilled TMSCl solution (10 mL, 79 mmol) was slowly added and stirred for 10 min at -78 ° C. After this time, the reaction mixture was gradually brought to room temperature while stirring for 1 h. The mixture was diluted with hexane (50 mL) and filtered through celite three times. The filtrate was concentrated to a yellow oil which was distilled under reduced pressure (5 mmHg, 70 ° C). Diene was obtained as a clear oil (5.55 g, 61%) and stored under nitrogen

in cold.<sup>4</sup> **<sup>1</sup>H NMR** (300 MHz, CDCl<sub>3</sub>) δ(ppm): 4.34 (d, 1H, J=1.8Hz), 4.03 (d, 1H, J=1.5Hz), 3.98 (t, 1H, J=1.6Hz) 3.57 (s, 3H), 3.56 (s, 3H) 0.25 (s, 9H). **<sup>13</sup>C NMR** (75 MHz, CDCl<sub>3</sub>) δ(ppm): 158.86 (C-1, C-3), 78.71 (C-4), 75.60 (C-2), 55.16 (OCH<sub>3</sub>), 54.22 (OCH<sub>3</sub>), 0.7 (3xCH<sub>3</sub>).

### Synthesis of naphthoquinone **N2**:

A solution of 2-halo-6-methoxy-1,4-benzoquinone (**Q1-Q4**) (100mg) and **Brassard's diene** (1.5 eq.) in 5 mL of toluene was refluxed for 0.3-2.5 h according to TLC monitoring. After the reaction was completed, the solvent was evaporated and the residue purified by flash chromatography. The products obtained were yellow-orange in color.

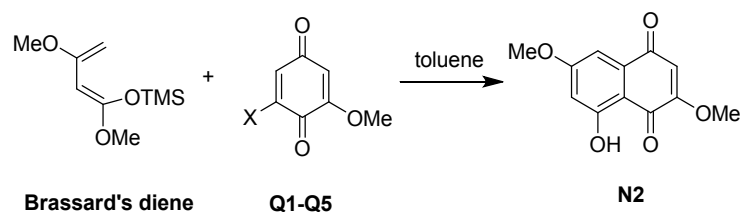

**Scheme S1.** Synthesis of naphthoquinone **N2**.

**Table 1.** Synthesis naphthoquinones: cycloaddition and aromatization.

| X  | Time (h) | Naphthoquinone | % R |
|----|----------|----------------|-----|
| F  | 2        | <b>N2</b>      | 51  |
| Cl | 2.5      | <b>N2</b>      | 60  |
| Br | 2        | <b>N2</b>      | 71  |
| I  | 0.3      | <b>N2</b>      | 74  |

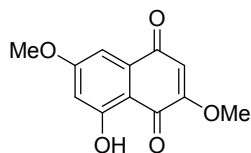

#

**2,6-dimethoxy-8-hydroxy-1,4-naphthoquinone (N2):** Obtained as a yellow-orange solid and purified by column chromatography over silica gel using CH<sub>2</sub>Cl<sub>2</sub>/MeOH (95:5) with a yield of 51-74 %R. **M.p.** 251.9-252.6 °C (MeOH); **<sup>1</sup>H NMR** (400 MHz, CDCl<sub>3</sub>) δ(ppm): 12.01 (s, 1H, -OH), 7.18 (d, 1H, J=2.5Hz, H-5), 6.61 (d, 1H, J=2.4 Hz, H-7), 6.09 (s, 1H, H-3), 3.91 (s, 3H, a), 3.90 (s, 3H, q); **<sup>13</sup>C NMR** (100 MHz, CDCl<sub>3</sub>) δ(ppm): 183.63, 182.66, 166.61, 164.77, 160.58, 133.63, 109.61, 108.65, 107.88, 105.23, 56.43, 55.95; **GC-MS:** m/z 234 (M<sup>+</sup>); **IR (ATR).** ν=1639, 1615, 1595, 1579, 1389, 1319, 1234 cm<sup>-1</sup>. **Anal. Calcd.** for C<sub>12</sub>H<sub>10</sub>O<sub>5</sub>:C, 61.54; H, 4.30; O, 34.16; found: C, 53.90; H, 2.95.

# NMR Spectroscopy for compound Q1

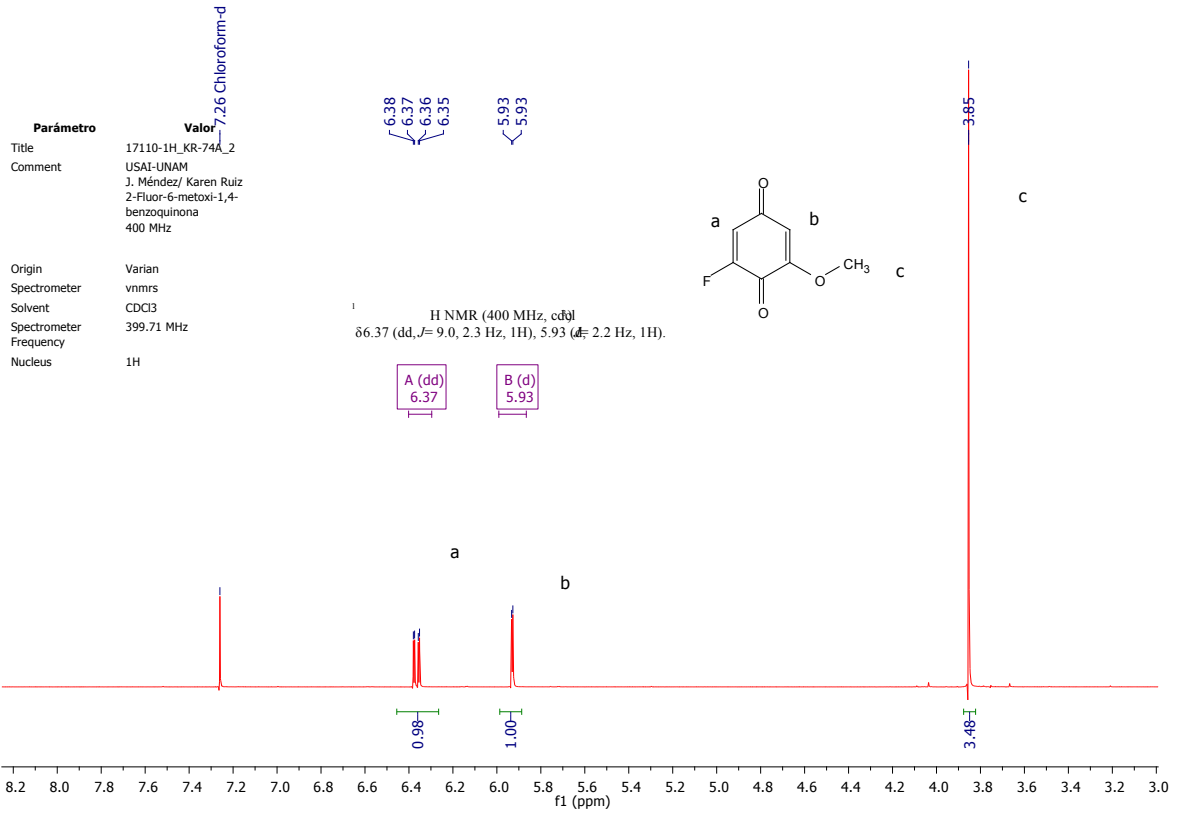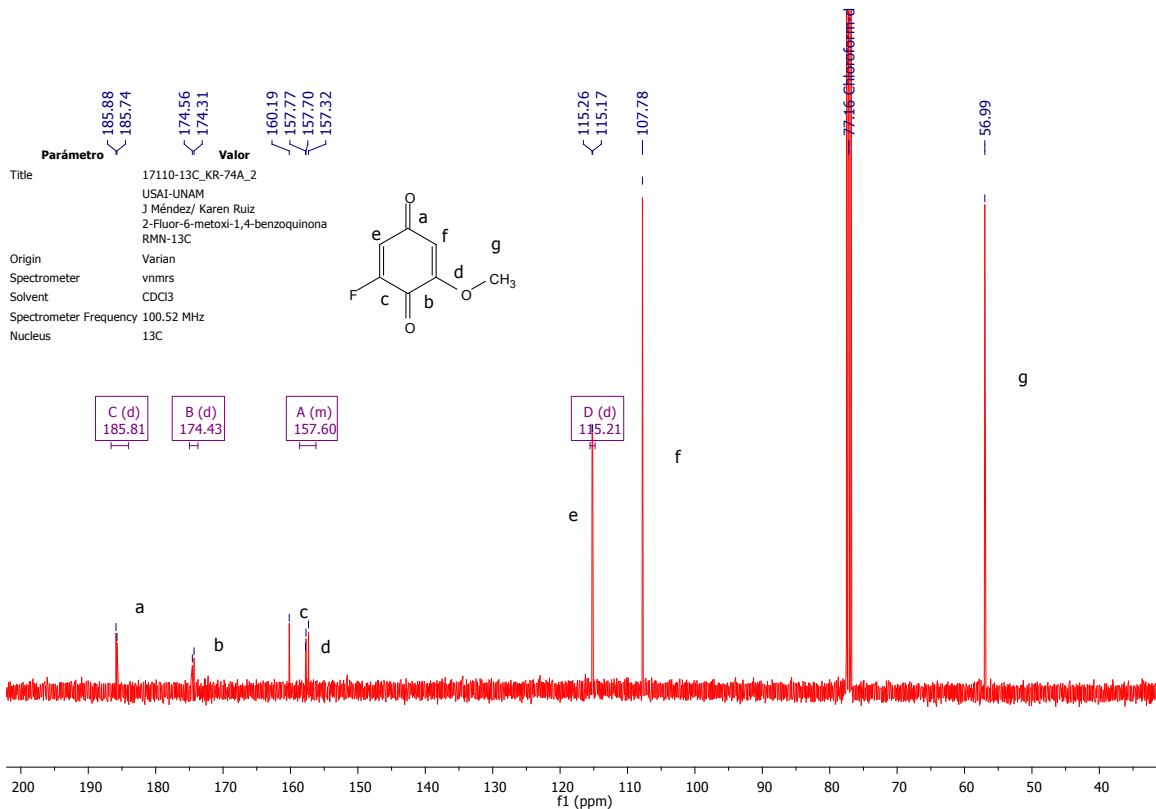



**Parámetro**      **Valor**  
 Title                17110-19F\_KR-74A  
                          USAI-UNAM  
                          J Méndez/ Karen Ruiz  
                          2-fluor-6-metoxi-1,4-benzoquinona  
                          19F  
 Origin                Varian  
 Spectrometer        inova  
 Solvent               CDCl3  
 Spectrometer Frequency 282.42 MHz  
 Nucleus               19F

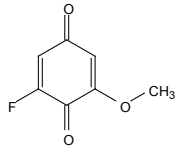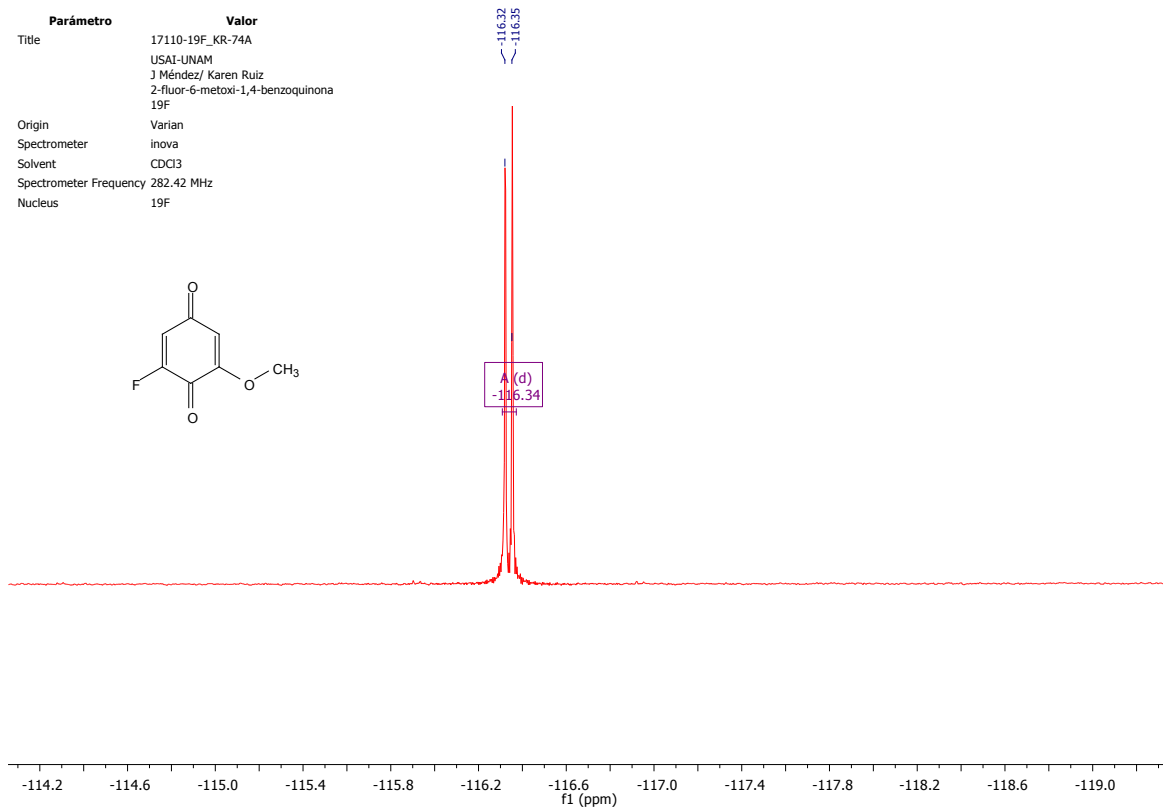

## NMR Spectroscopy for compound Q2

**Parámetro**      **Valor**  
 Title                1H-KR-81a  
 Comment            USAI/ J. Méndez  
                          Karen Ruiz/ KR-81a  
                          2-cloro-6-metoxi-1,4-benzoquinona  
                          300-1  
 Origin                Varian  
 Spectrometer        inova  
 Solvent               CDCl3  
 Frequency           300.15 MHz  
 Nucleus               1H

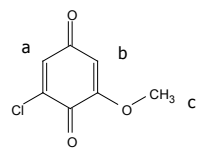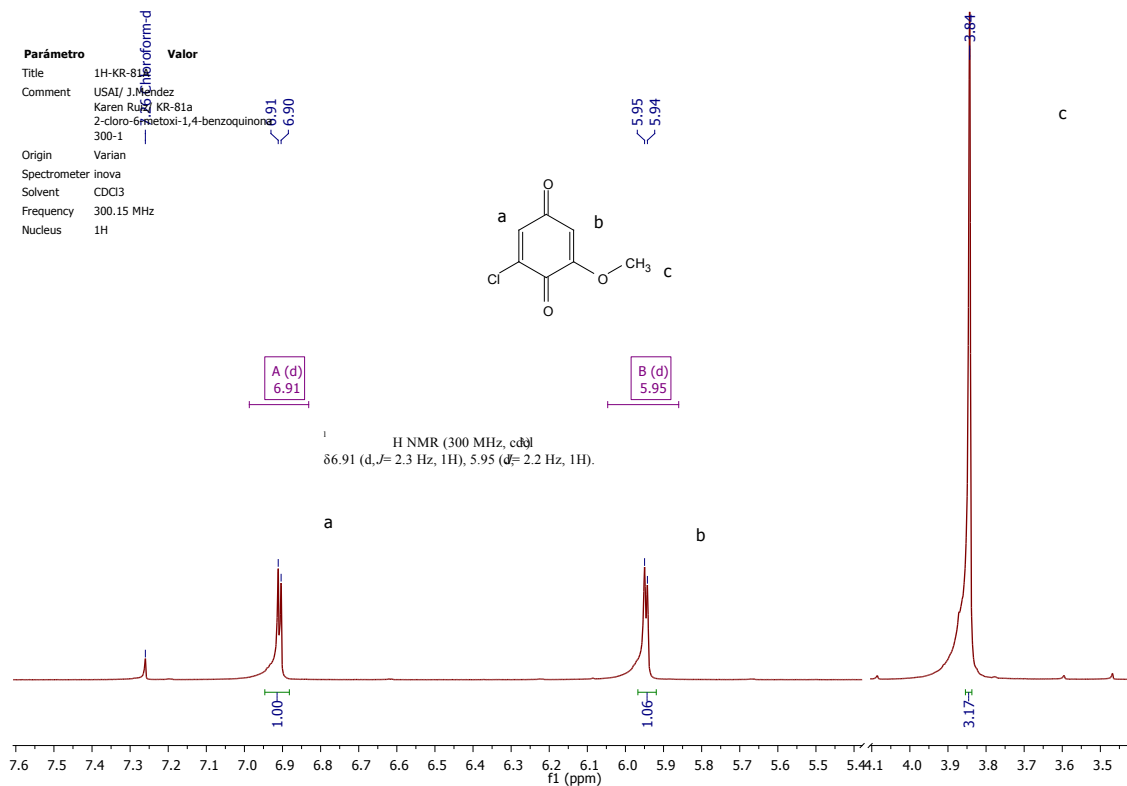

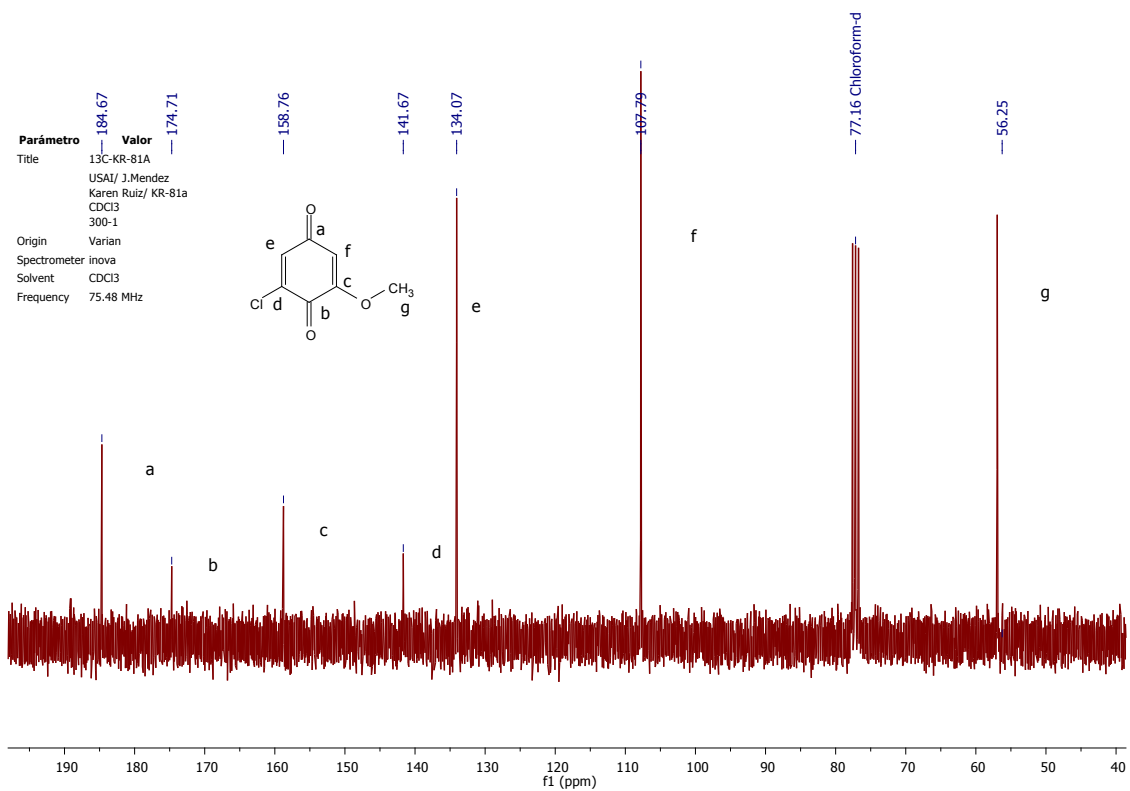

### NMR Spectroscopy for compound Q3

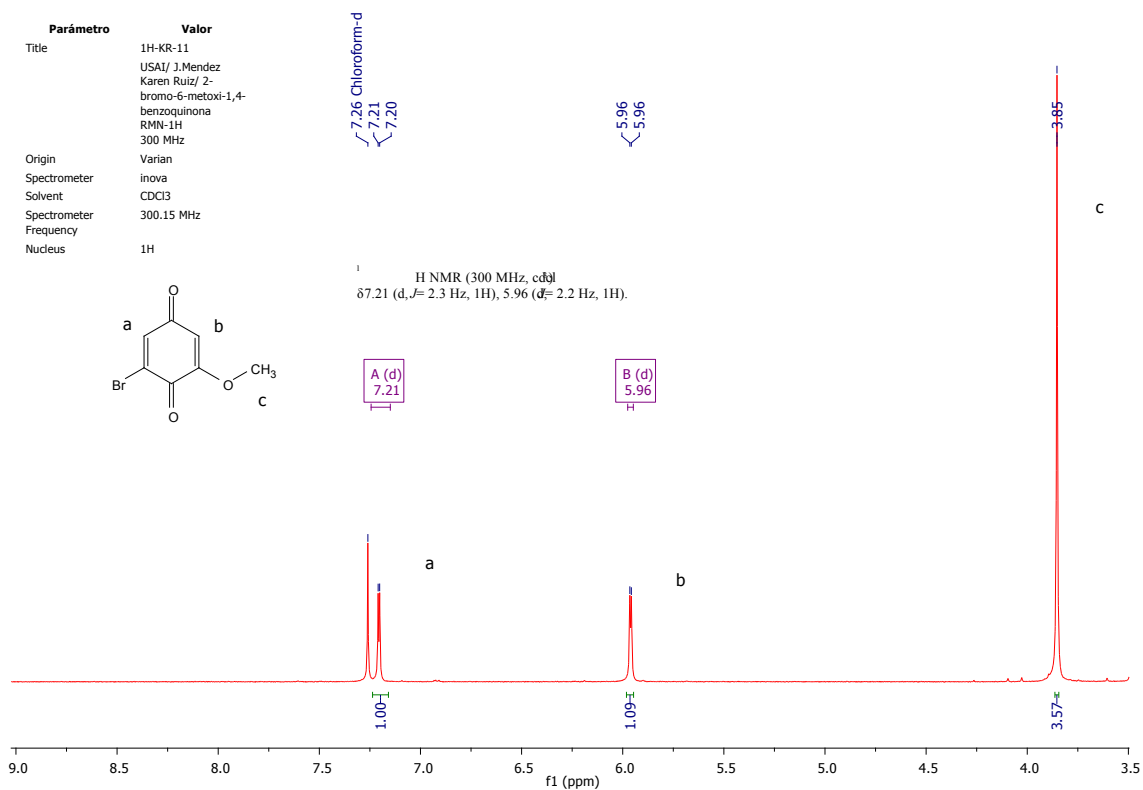

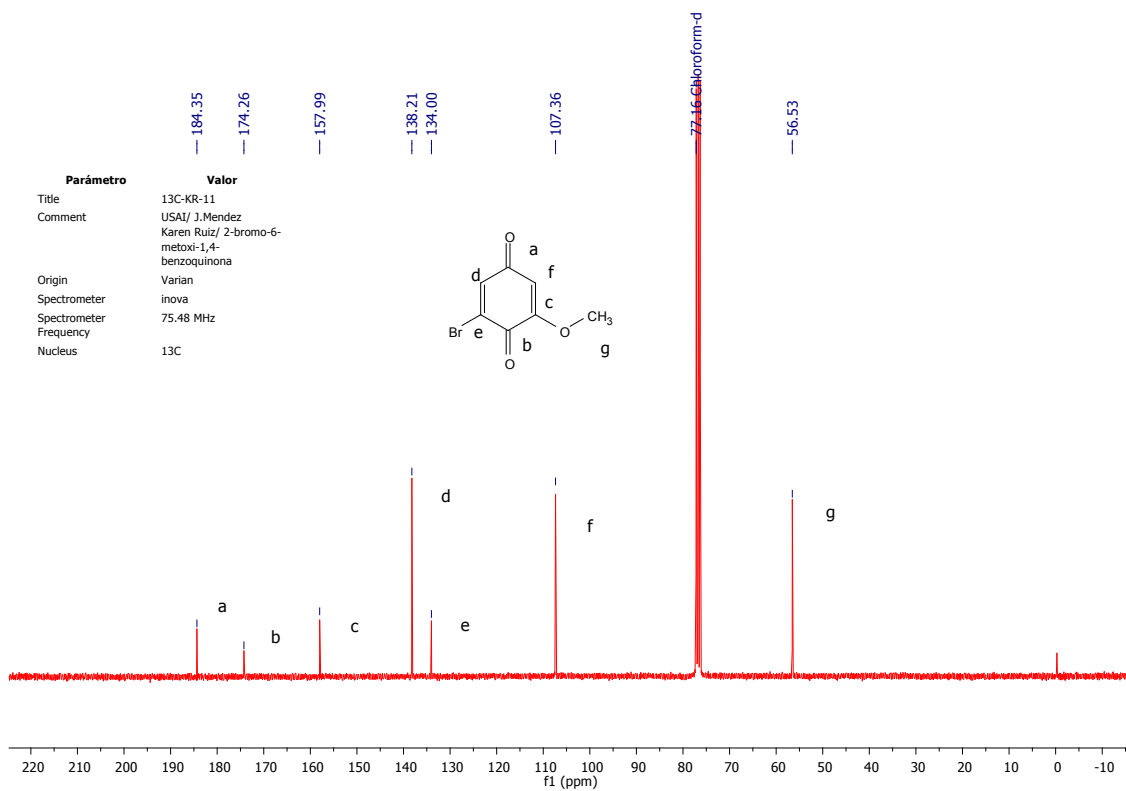

## NMR Spectroscopy for compound Q4

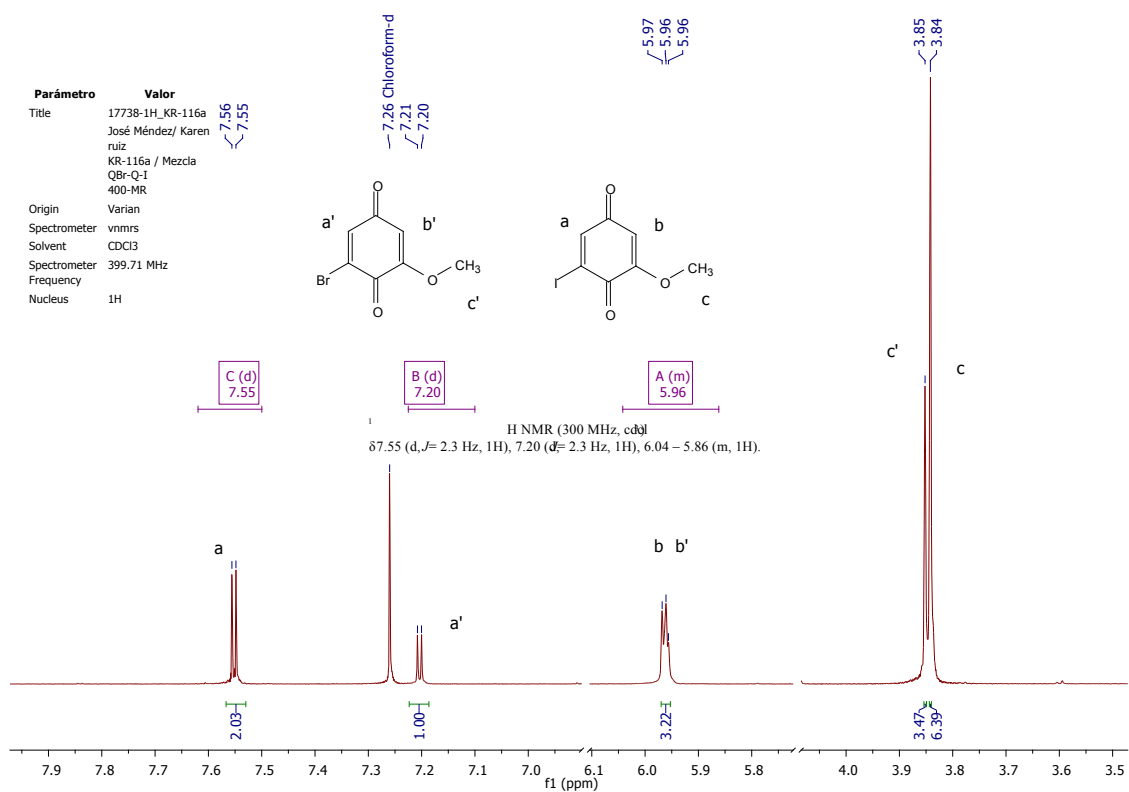

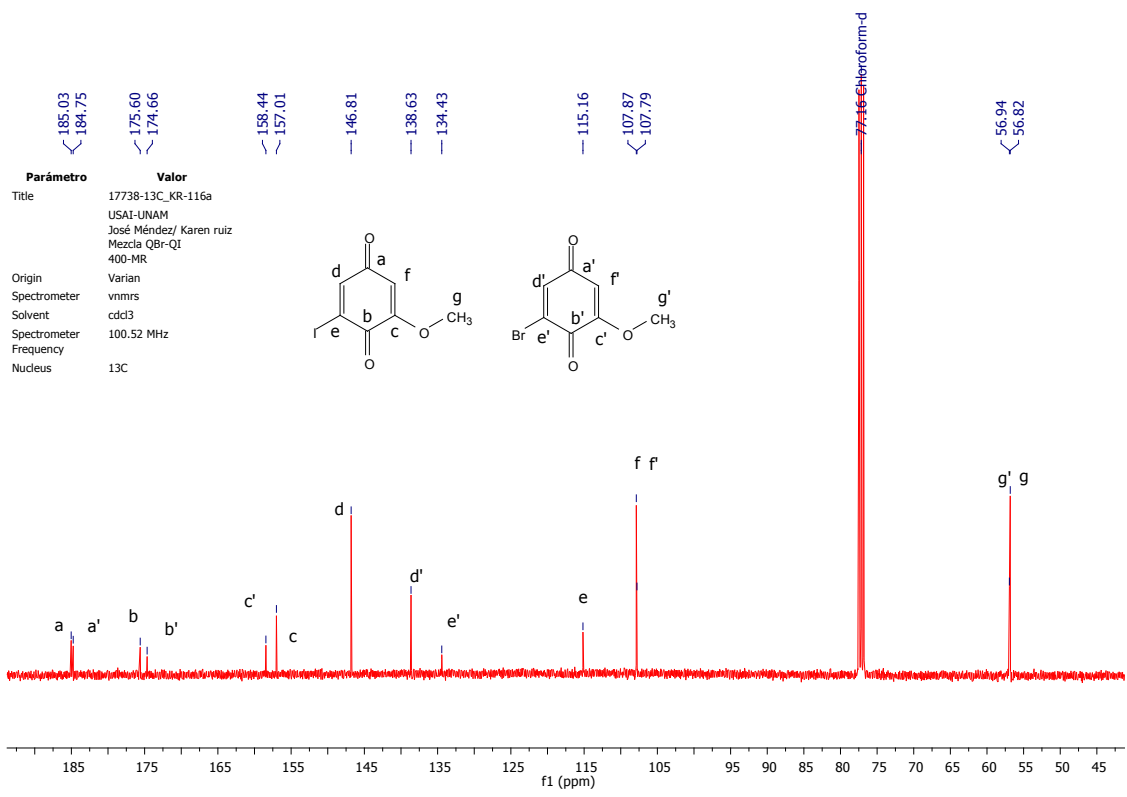

### NMR Spectroscopy for ester 2

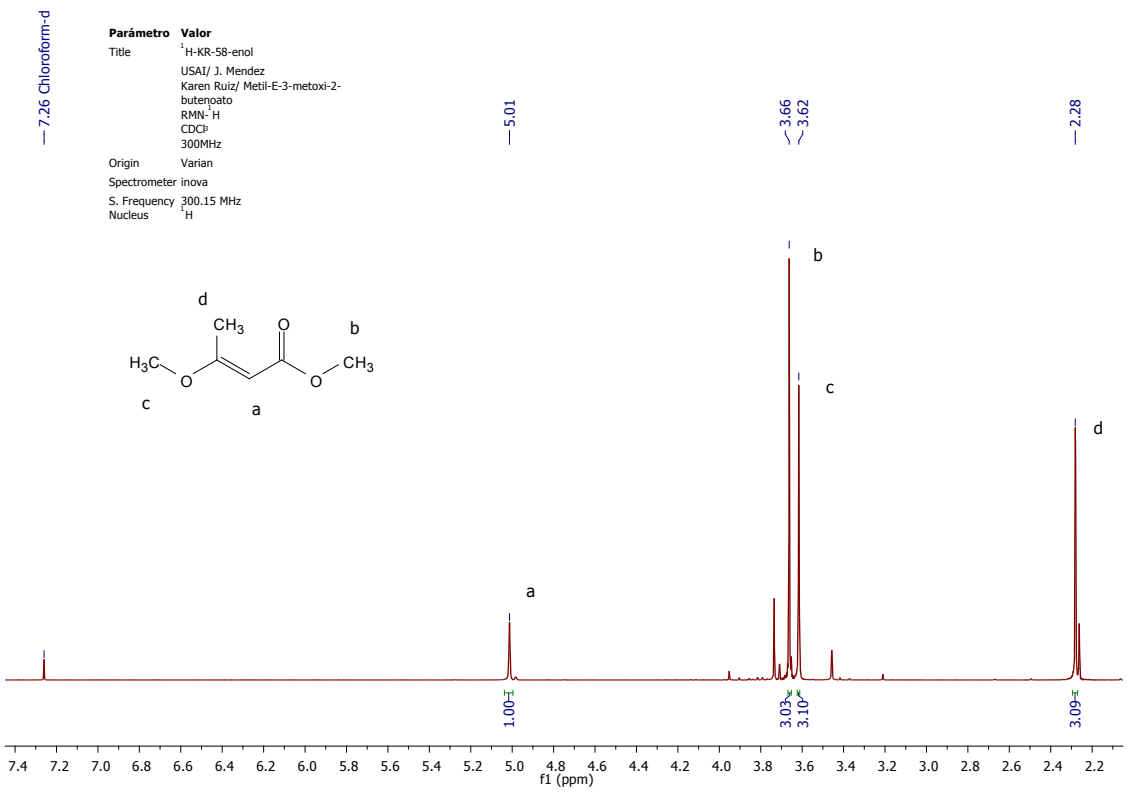

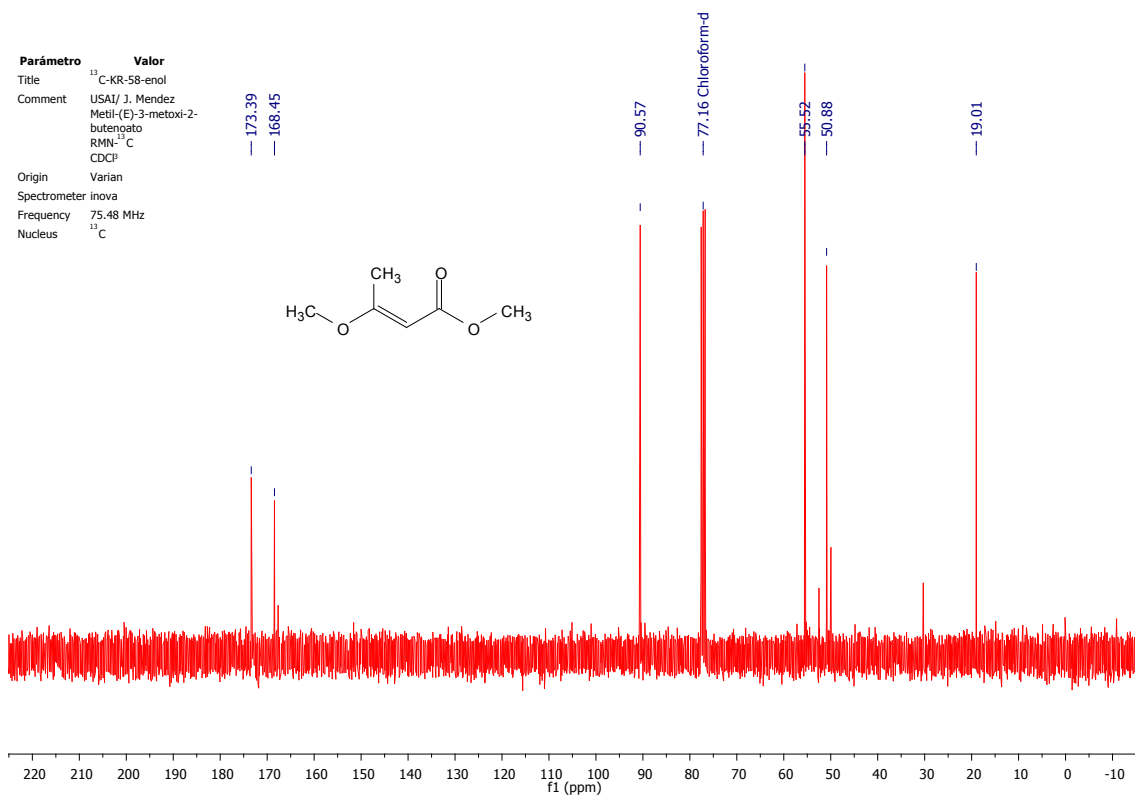

### NMR Spectroscopy for Brassard's diene

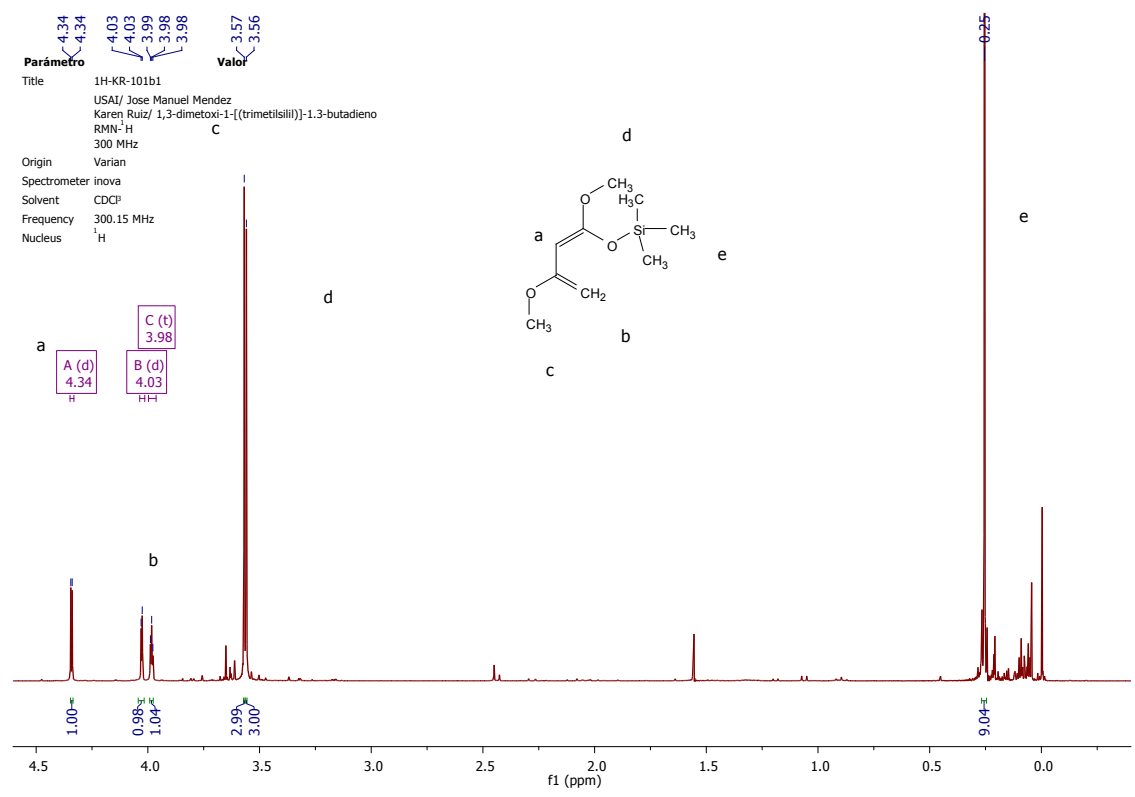

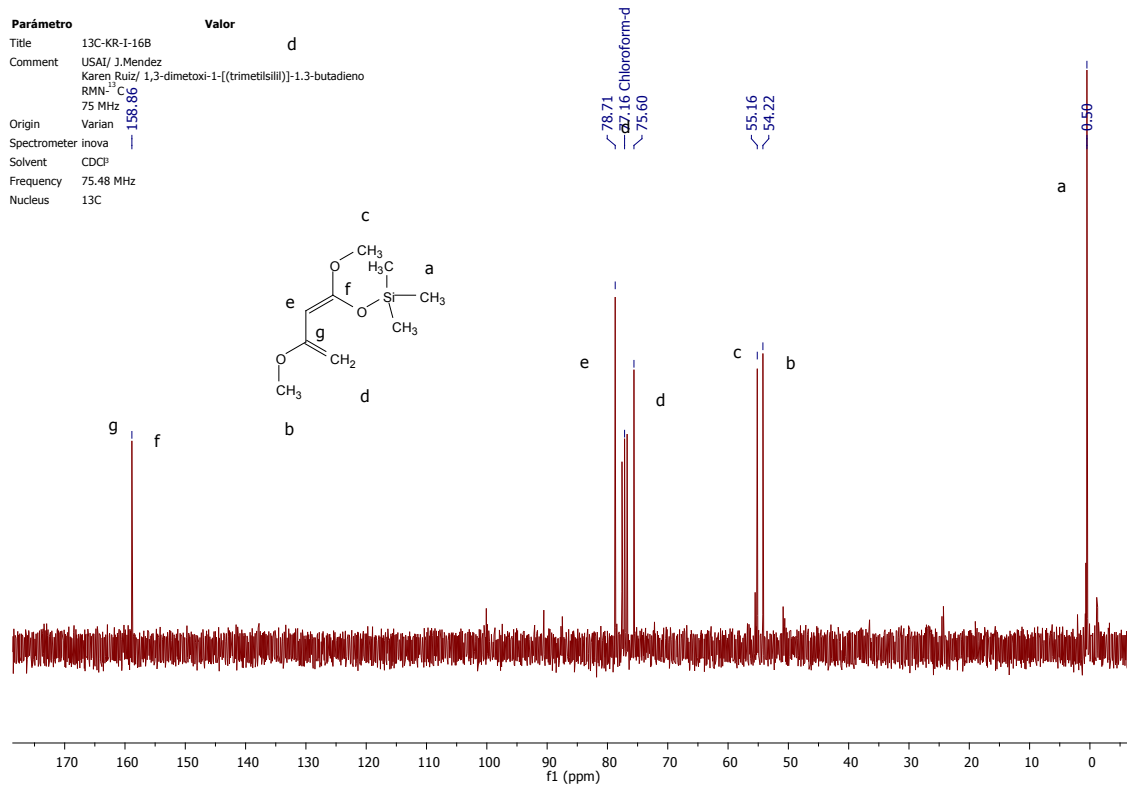

### NMR Spectroscopy for compound N2

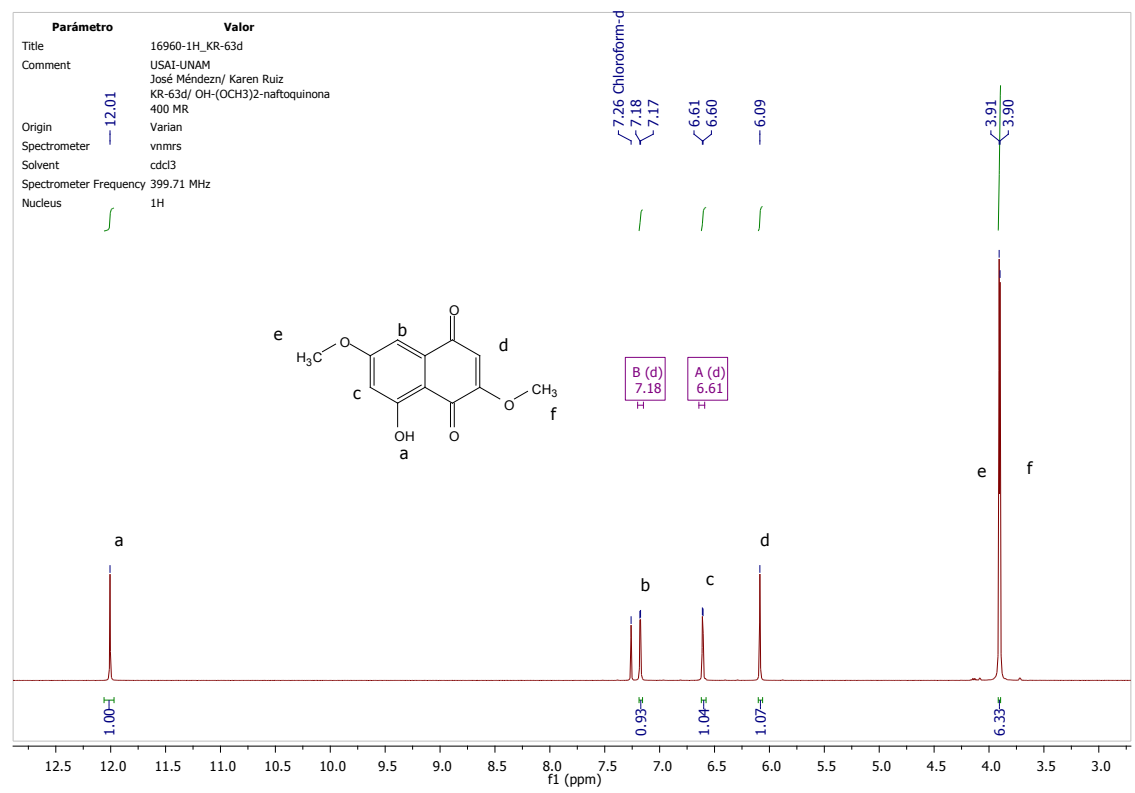

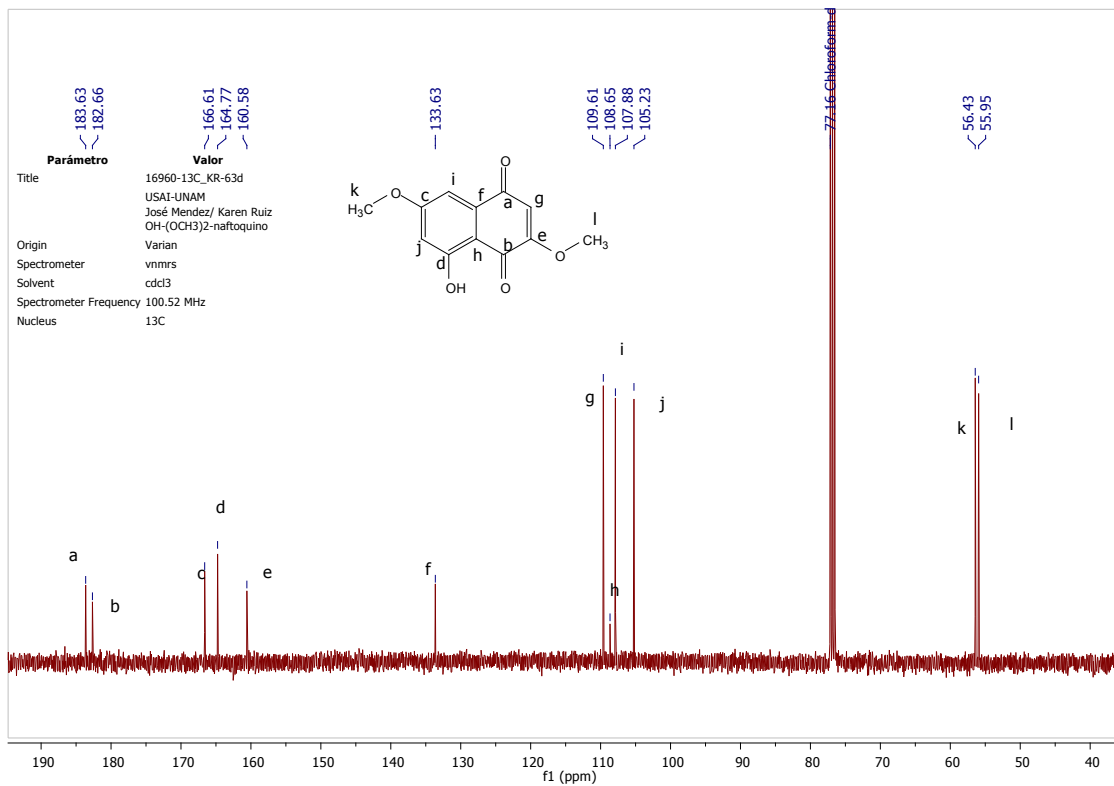

## Topological analysis of the electron density for $\pi$ -complexes between Brassard's diene and fluoroquinone Q1

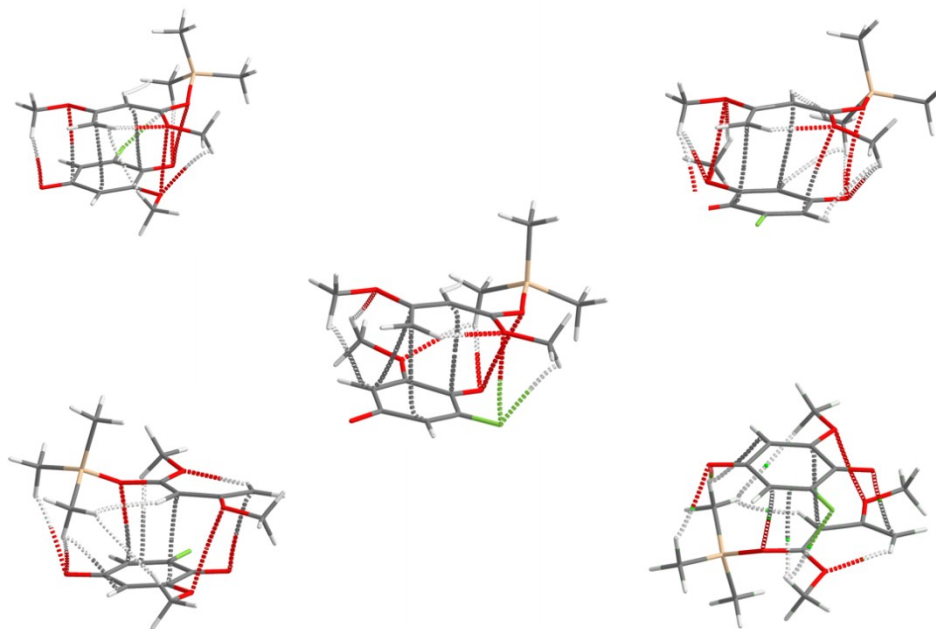

**Topological analysis of the electron density for  $\pi$ -complexes between  
Brassard's diene and chloroquinone Q2**

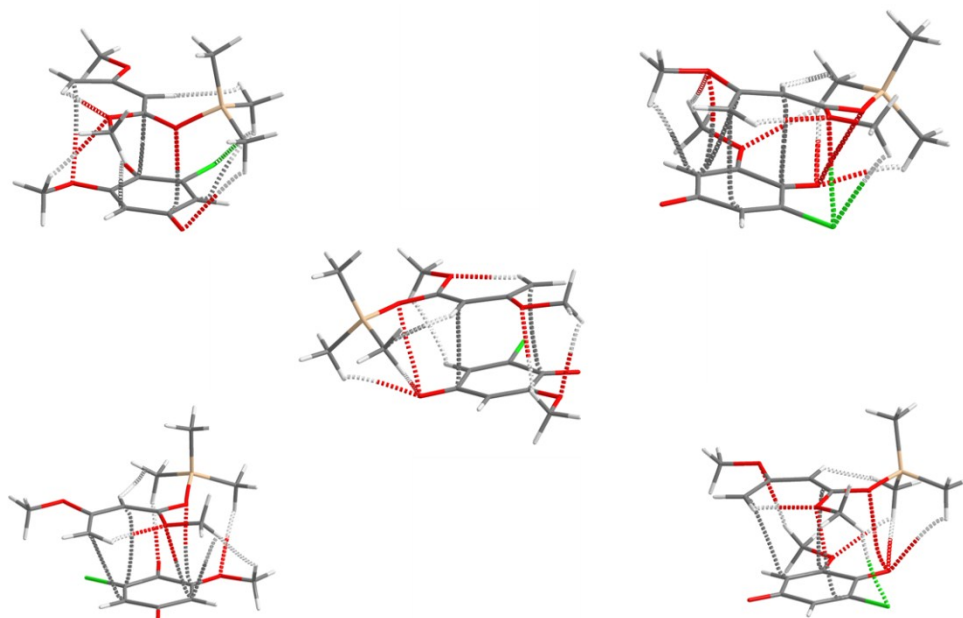

**Topological analysis of the electron density for  $\pi$ -complexes between  
Brassard's diene and bromoquinone Q3**

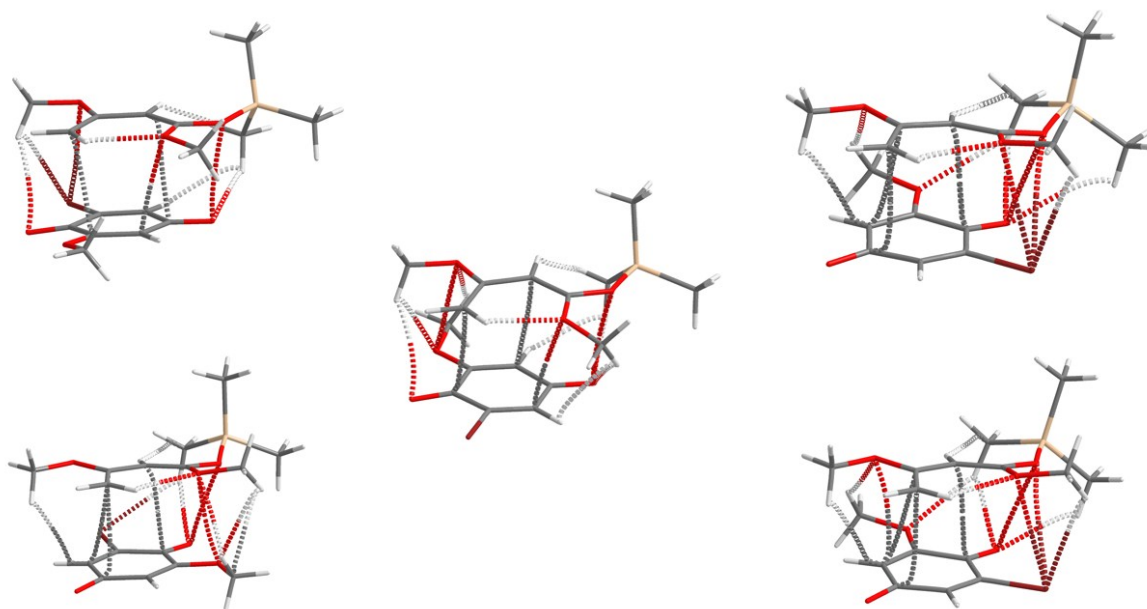



## Topological analysis of the electron density for $\pi$ -complexes between Brassard's diene and iodoquinone Q4

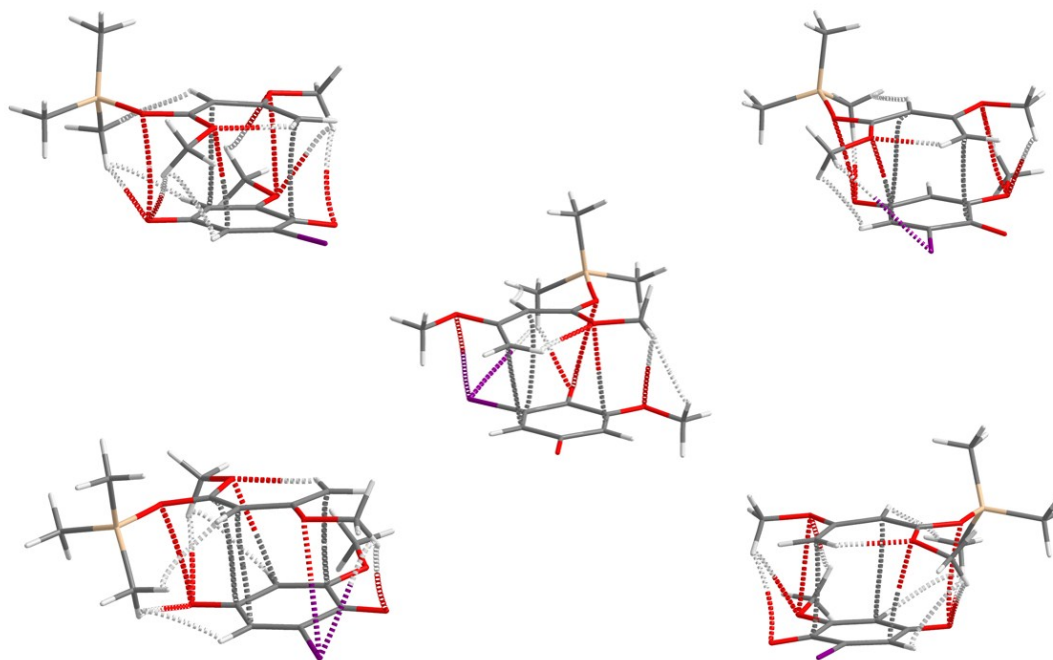

### Sampling of addition routes

Virtually every carbon atom at the 1,4-benzoquinone core is a potential 1,2 or 1,4 electrophile. The corresponding set of possible products is shown in Figure SX. The random sampling method applied, yielded geometries close to addition to every electrophilic carbon. The corresponding addition products were built and optimized at the M06-2X/6-31+G(d) level, with PCM implicit toluene solvation. Energies shown were computed using the 6-311++G(2d,2p) basis set.

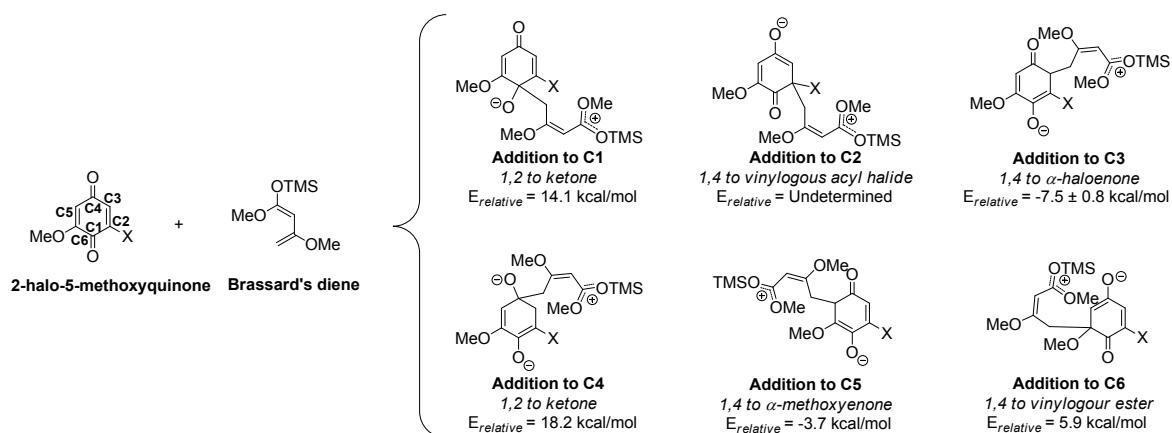

**Scheme S2.** Comparison between DFT energies of the probable addition products at every quinone position shows the observed regiochemistry is linked to the lowest-energy nucleophilic intermediate. Energies shown are relative to the corresponding stacked supermolecule.

As seen, the only observed regioisomer is theoretically linked to a transient, lower-energy intermediate, derived from 1,4-addition of an activated diene to a  $\alpha$ -haloenone system. The most probable competing addition would be, within this analysis, to the C5 electrophilic position. Products associated with this route were not observed in any case, and have not been reported up to date.

Addition to atom C2 was not determined since all attempts of modelling this reaction led to halogen elimination, an experimentally unobserved outcome.

All alternative addition products are strongly disfavored, so addition to position C3 of the studied quinones is the main result. In the vast majority of reported cases, this is the only observed product.

## Energy profiles and IRCs for the reaction between Brassard's diene and Q1

### N2 routes

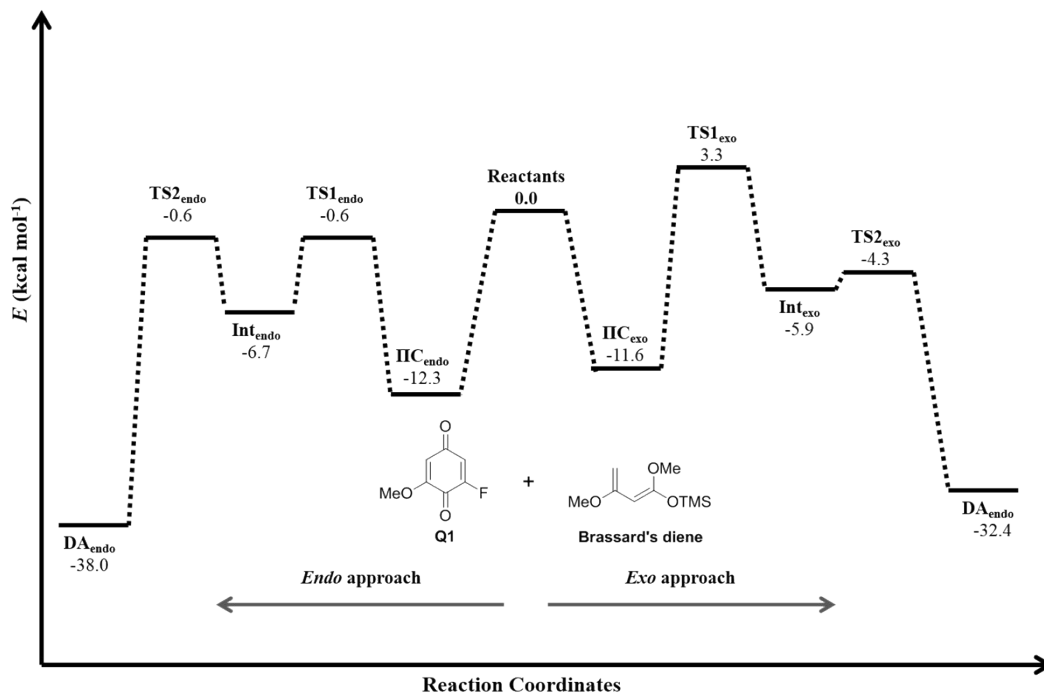

N1 routes

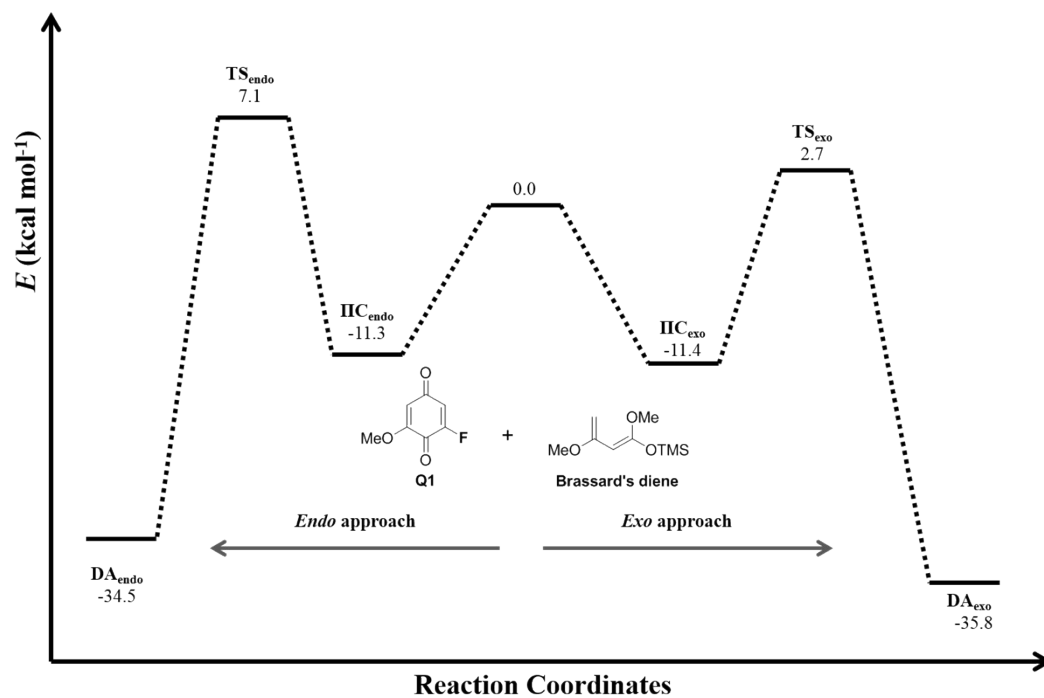

N2 route with fluoroquinone Q1

Endo approach

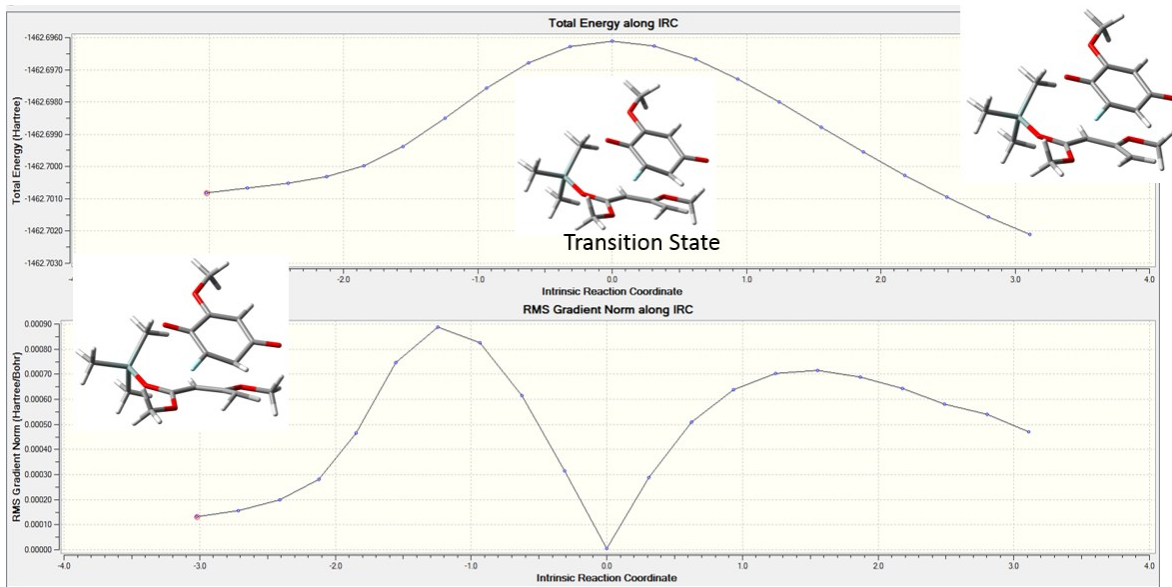

*Exo approach*

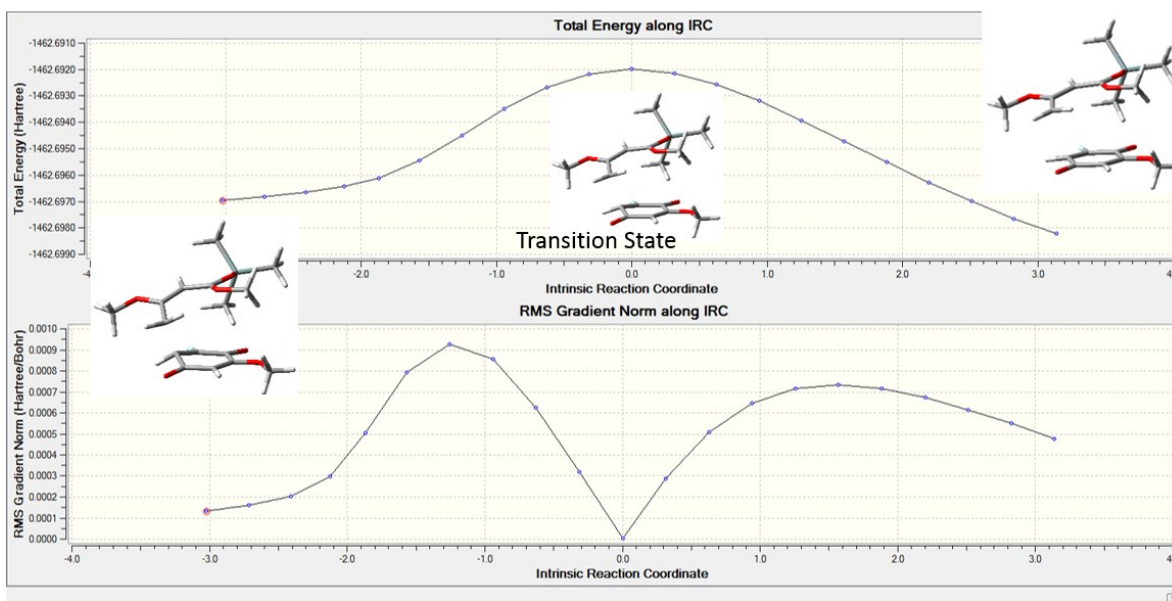

**N1 route with fluoroquinone Q1**

### Endo approach

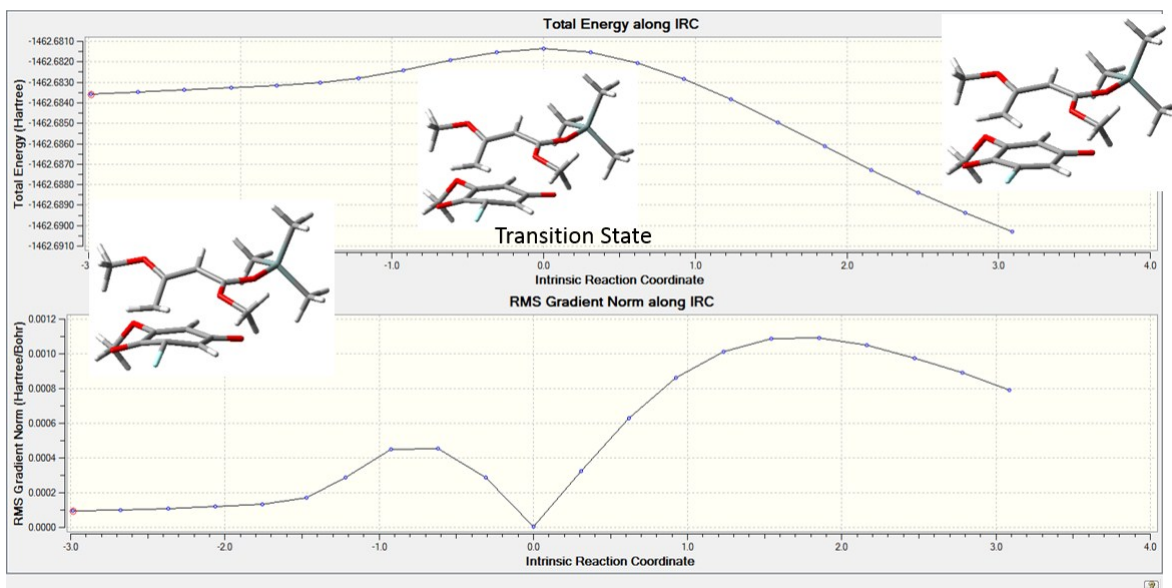

### Endo approach

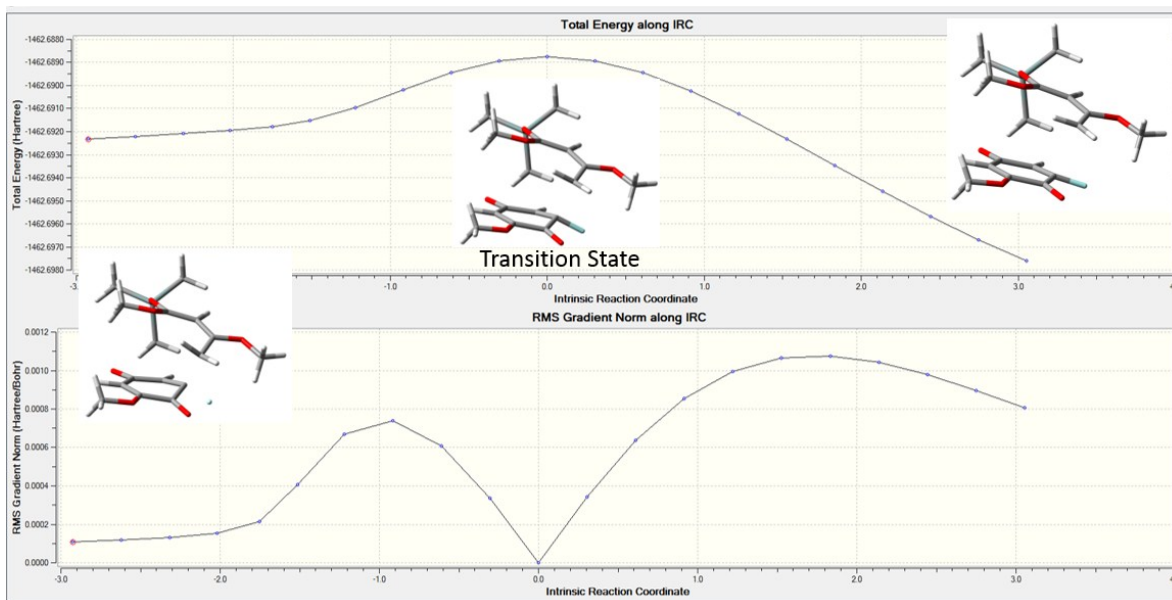

Energy profiles and IRCs for the reaction between Brassard's diene and Q2

### N2 routes

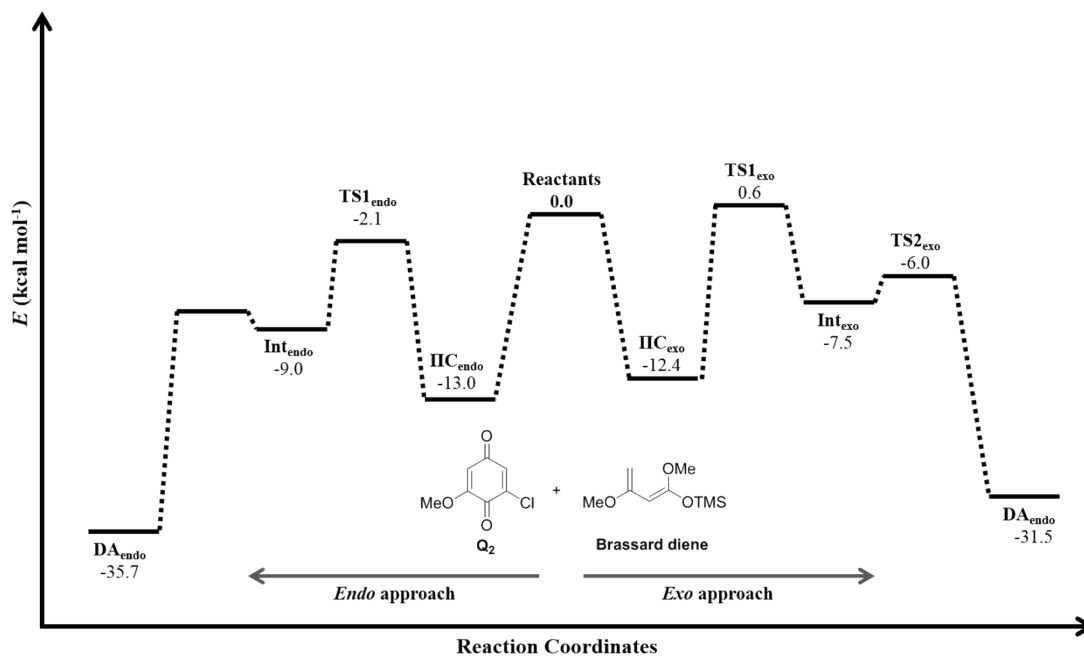

### N1 routes

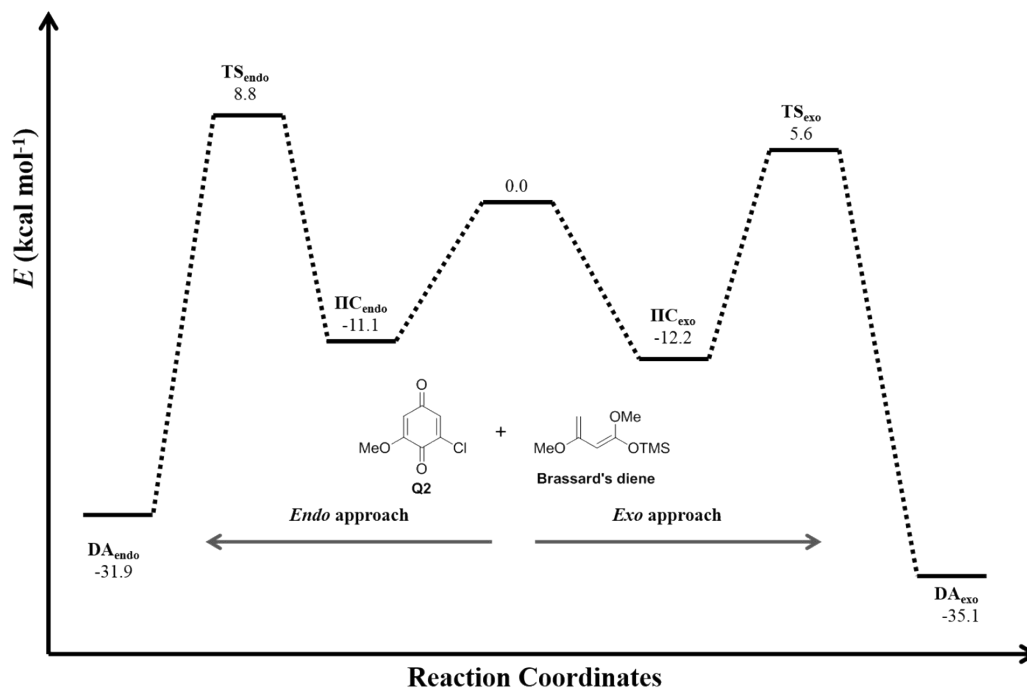

### N2 route with chloroquinone Q2

### Endo approach

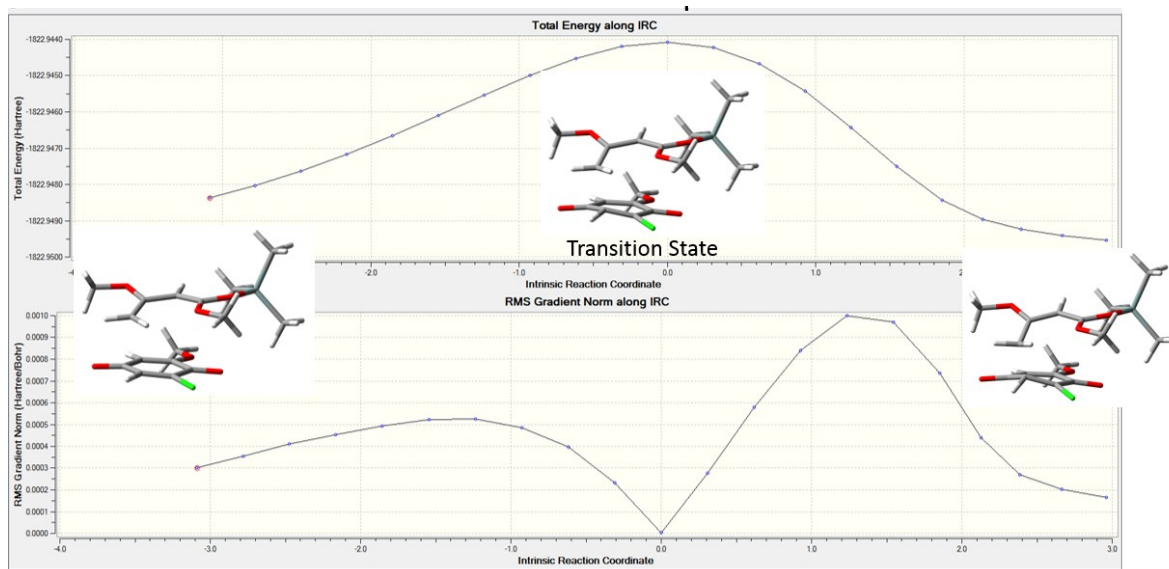

### Exo approach

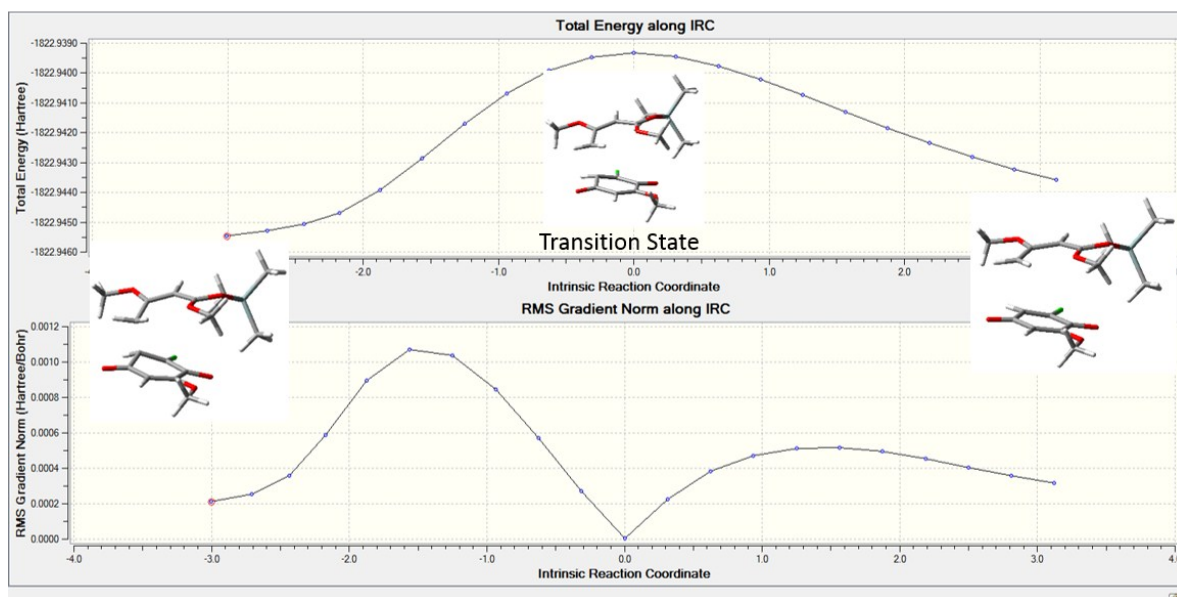

**N1 route with chloroquinone Q2**



### Endo approach

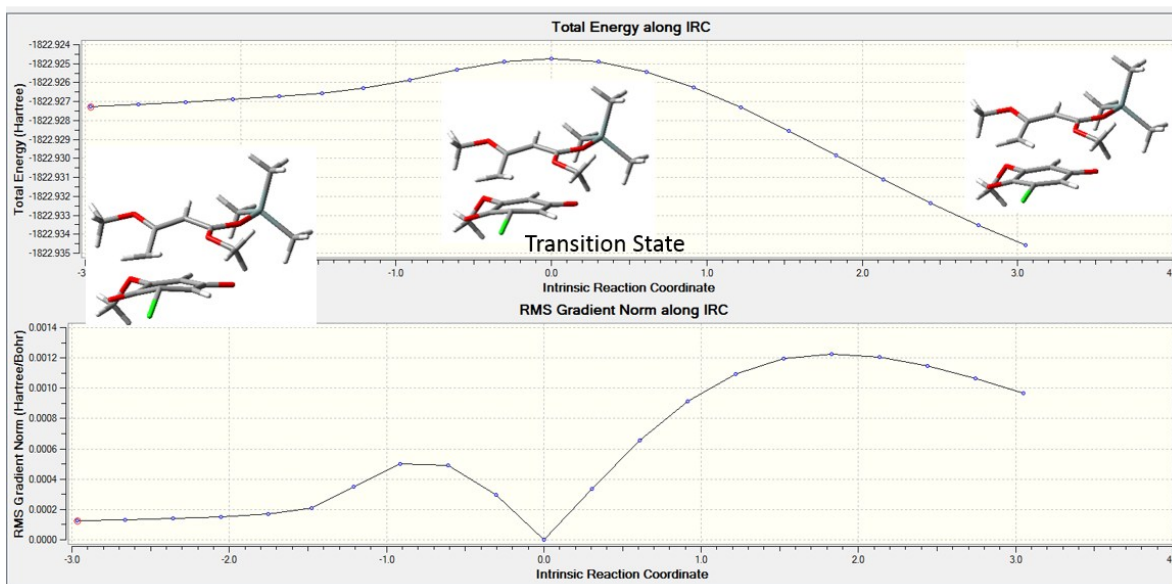

### Exo approach

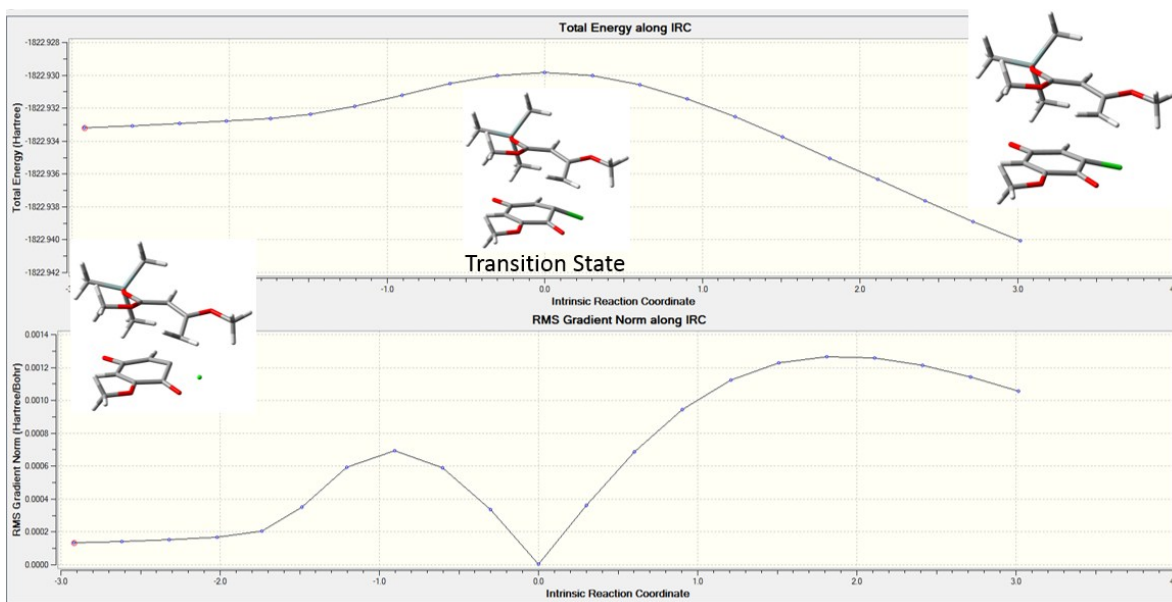

Energy profiles and IRCs for the reaction between Brassard's diene and Q3



## N2 routes

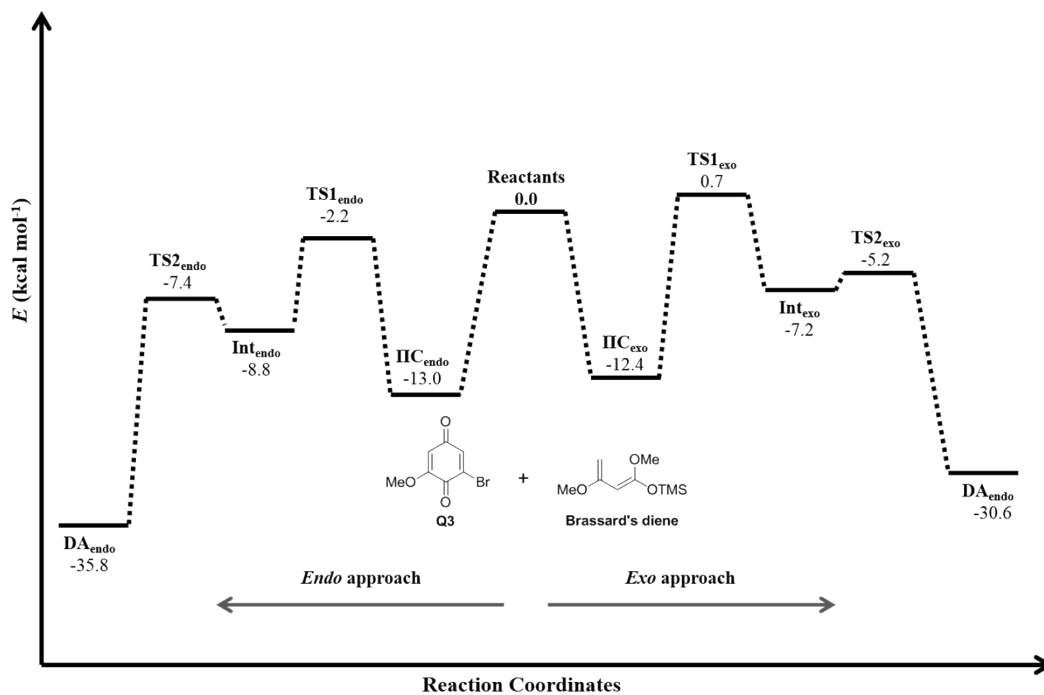

## N1 routes

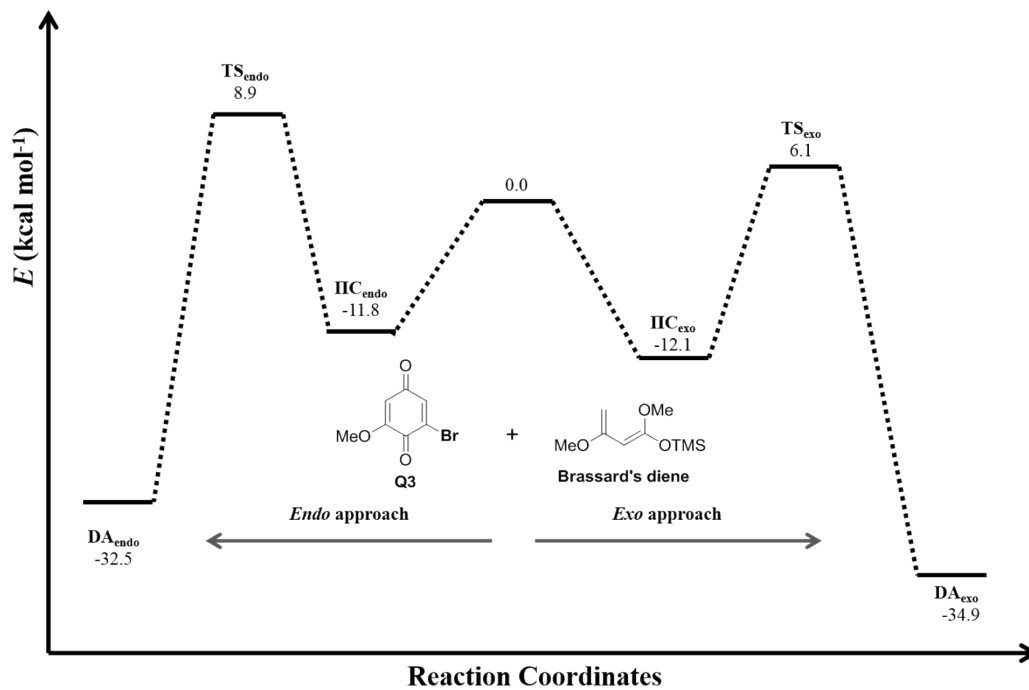

## N2 route with bromoquinone Q3

*Endo approach*

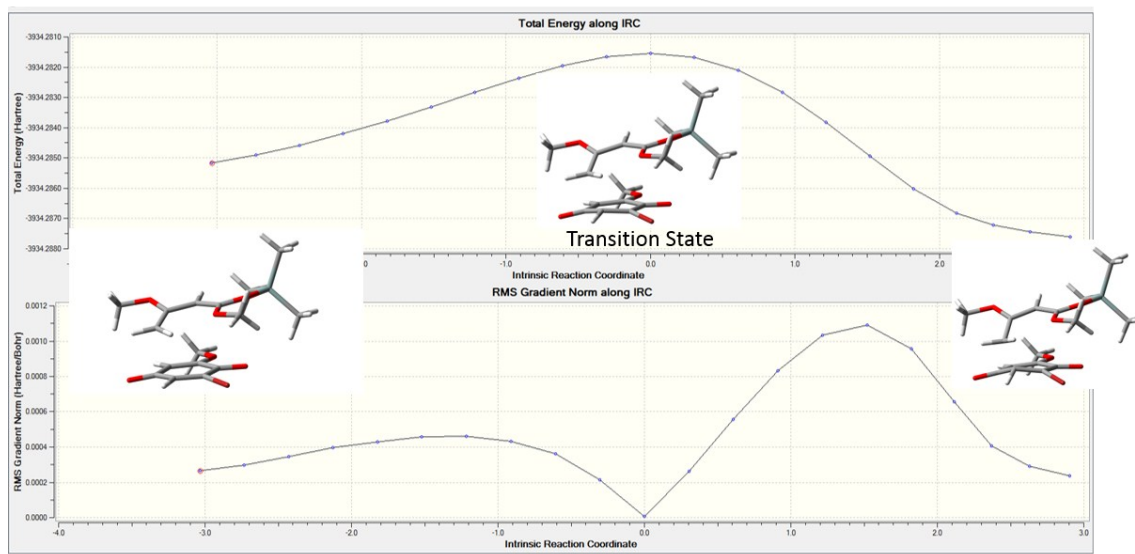

*Exo approach*

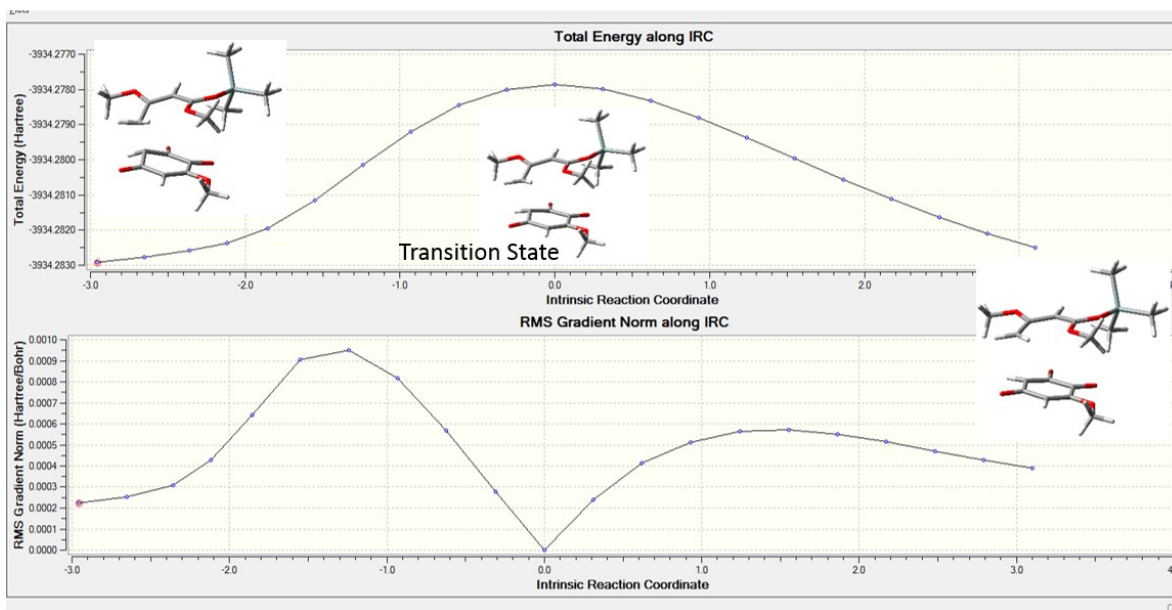

**N1 route with bromoquinone Q3**

### Endo approach

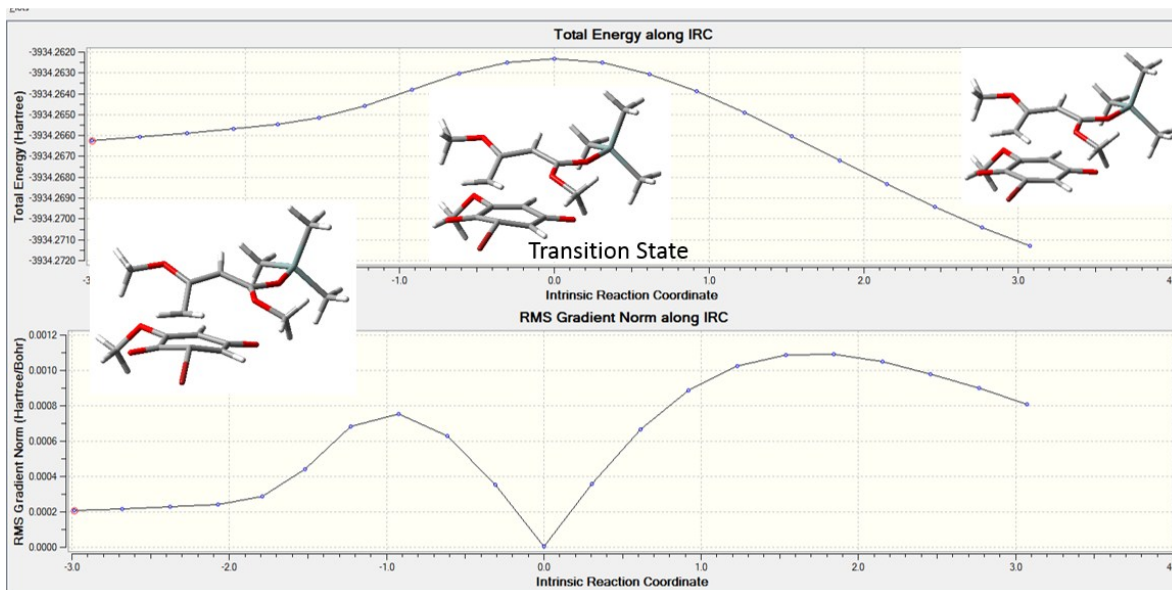

### Exo approach

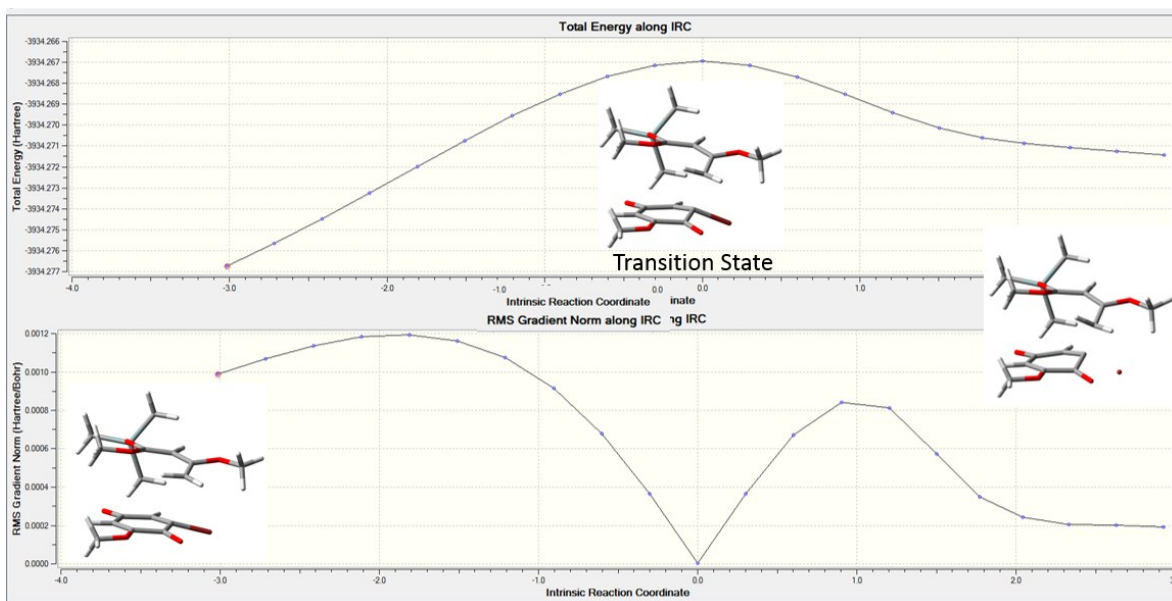

Energy profiles and IRCs for the reaction between Brassard's diene and Q4

### N2 routes

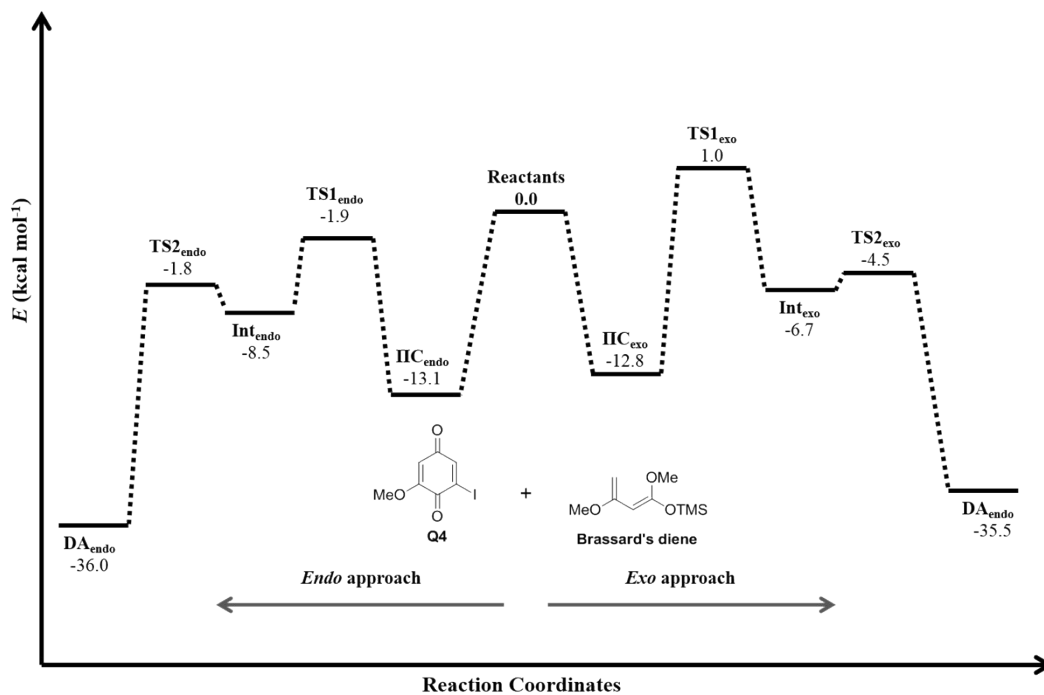

### N1 routes

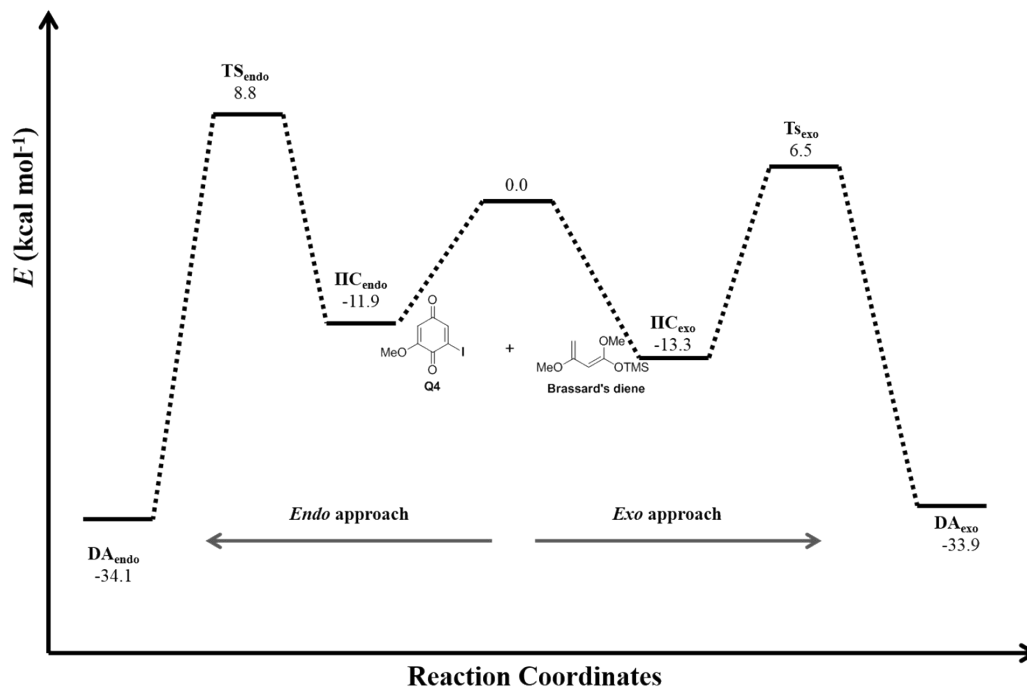

### N2 route with iodoquinone Q4

## Endo approach

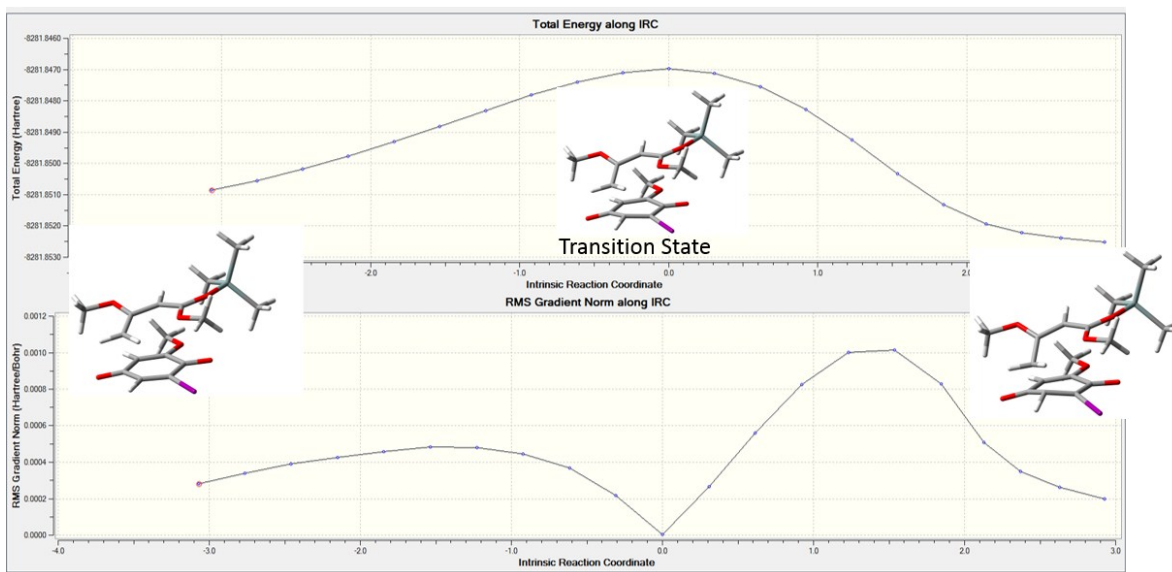

## Exo approach

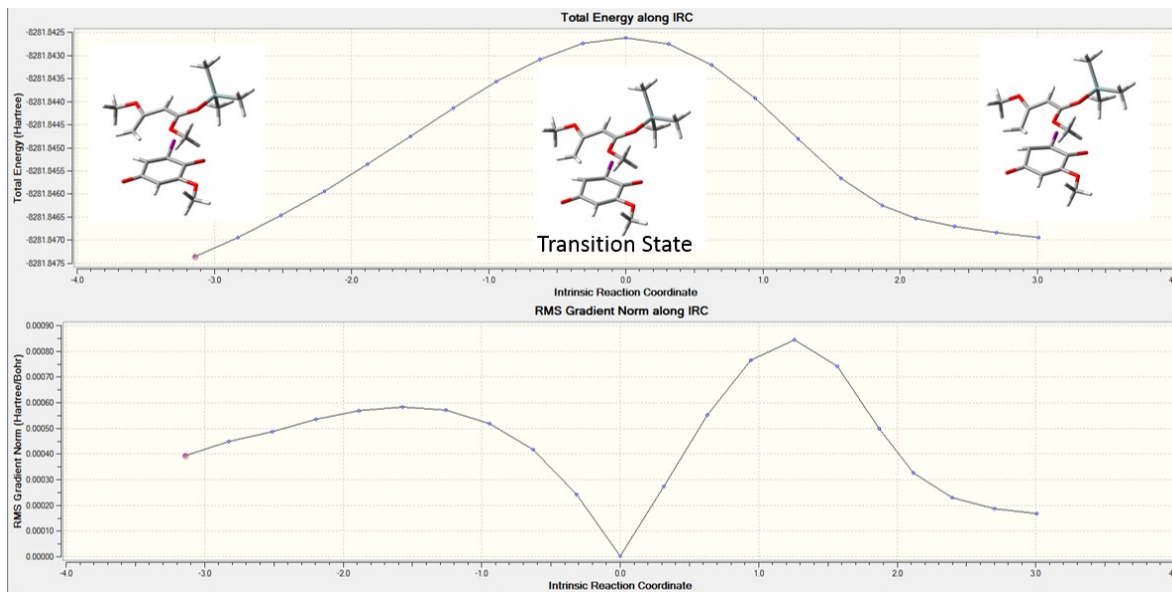

## N1 route with iodoquinone Q4

*Endo approach*

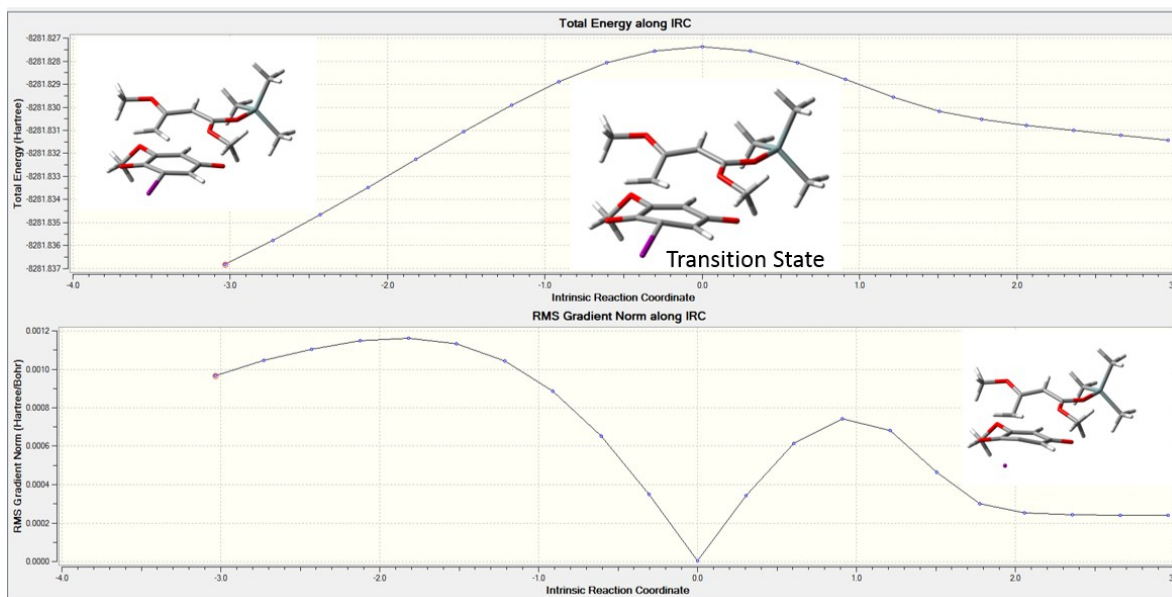

*Exo approach*

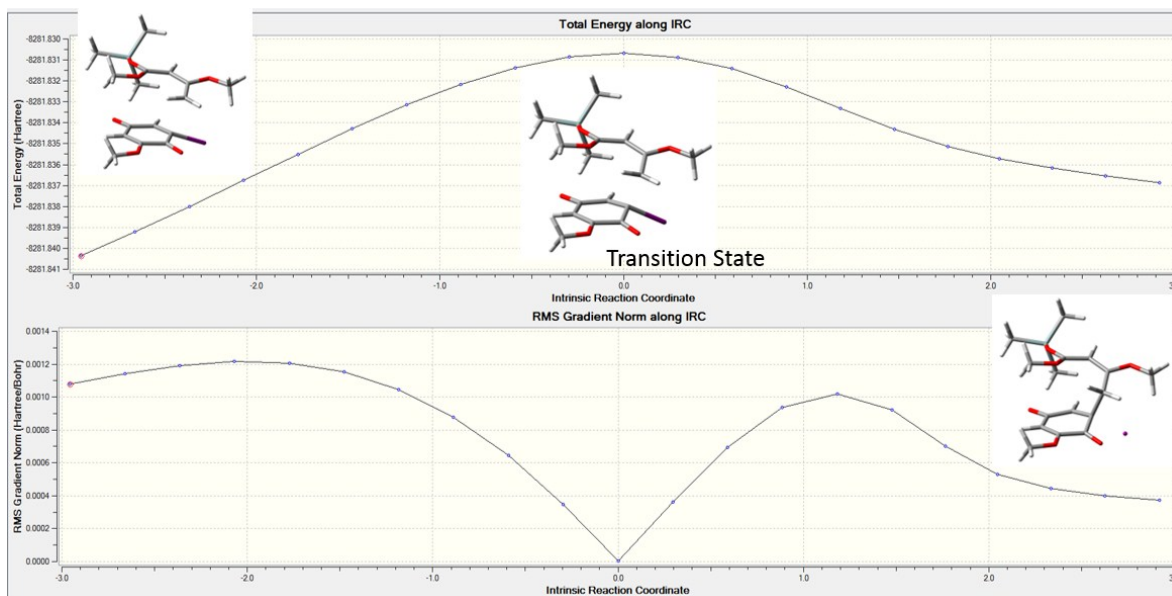

## Global Electron-Density Transfer (GEDT) Indices for Transition States

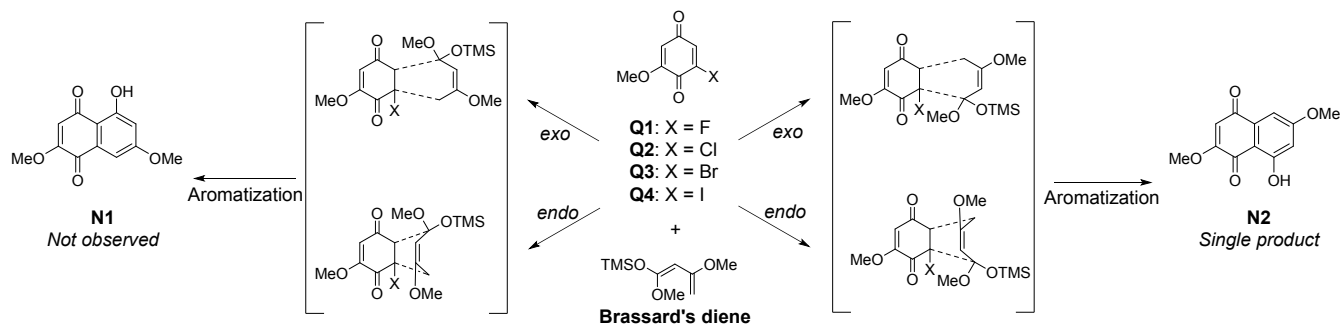

Computed through Natural Population Analysis at the M062X 6-31+G(d) level

| Cycloadduct | Approach    | Halogen | GEDT (e) |
|-------------|-------------|---------|----------|
| <b>N1</b>   | <i>Exo</i>  | F       | 0.53     |
|             |             | Cl      | 0.56     |
|             |             | Br      | 0.56     |
|             |             | I       | 0.40     |
|             | <i>Endo</i> | F       | 0.57     |
|             |             | Cl      | 0.62     |
|             |             | Br      | 0.60     |
|             |             | I       | 0.55     |
| <b>N2</b>   | <i>Exo</i>  | F       | 0.55     |
|             |             | Cl      | 0.54     |
|             |             | Br      | 0.55     |
|             |             | I       | 0.48     |
|             | <i>Endo</i> | F       | 0.54     |
|             |             | Cl      | 0.55     |
|             |             | Br      | 0.56     |
|             |             | I       | 0.49     |

**Coordinates list for all calculated species.**

**1) Reactants structures.**

*Brassard diene:*

| Atomic<br>Number | Coordinates (Angstroms) |           |           |
|------------------|-------------------------|-----------|-----------|
|                  | X                       | Y         | Z         |
| 6                | -3.193348               | 1.061879  | -0.060391 |
| 6                | -2.423702               | -0.039220 | -0.038241 |
| 6                | -0.083080               | 0.868128  | -0.081406 |
| 6                | -0.982809               | -0.133545 | -0.080766 |
| 1                | -0.600142               | -1.140145 | -0.115957 |
| 8                | -2.927939               | -1.320448 | 0.031787  |
| 8                | -0.469133               | 2.157388  | -0.064888 |
| 8                | 1.246876                | 0.714884  | -0.097844 |
| 6                | -4.333496               | -1.445580 | 0.072042  |
| 1                | -4.792669               | -1.043424 | -0.832672 |
| 1                | -4.540797               | -2.506186 | 0.142688  |
| 1                | -4.751565               | -0.932181 | 0.937710  |
| 6                | 0.549125                | 3.145989  | 0.090668  |
| 1                | 1.225638                | 3.152047  | -0.758288 |
| 1                | 0.021331                | 4.089311  | 0.149487  |
| 1                | 1.118358                | 2.981321  | 1.001196  |
| 14               | 2.180014                | -0.697266 | 0.006545  |
| 6                | 1.774322                | -1.594172 | 1.583919  |
| 1                | 0.790578                | -2.057119 | 1.563342  |
| 1                | 2.501835                | -2.382426 | 1.773208  |
| 1                | 1.798002                | -0.918094 | 2.436358  |
| 6                | 1.889473                | -1.754635 | -1.494540 |
| 1                | 0.863125                | -2.108613 | -1.565717 |
| 1                | 2.105620                | -1.209518 | -2.411207 |

|   |           |           |           |
|---|-----------|-----------|-----------|
| 1 | 2.532512  | -2.633387 | -1.479225 |
| 6 | 3.902904  | -0.009798 | 0.032493  |
| 1 | 4.646612  | -0.794385 | 0.158895  |
| 1 | 4.135084  | 0.515464  | -0.891632 |
| 1 | 4.032894  | 0.696370  | 0.850474  |
| 1 | -2.733332 | 2.030021  | -0.122745 |
| 1 | -4.268057 | 1.013800  | -0.022646 |

*Quinone H:*

| Atomic<br>Number | Coordinates (Angstroms) |           |           |
|------------------|-------------------------|-----------|-----------|
|                  | X                       | Y         | Z         |
| 6                | 0.225611                | 1.378850  | 0.000011  |
| 6                | -1.244948               | 1.586261  | -0.000015 |
| 6                | -2.093542               | 0.553960  | -0.000015 |
| 6                | -1.600702               | -0.855335 | 0.000022  |
| 6                | -0.146755               | -1.085196 | 0.000012  |
| 6                | 0.719229                | -0.049194 | 0.000010  |
| 1                | -3.172892               | 0.676397  | -0.000036 |
| 1                | 0.165285                | -2.123415 | 0.000010  |
| 8                | -2.394533               | -1.780371 | -0.000024 |
| 8                | 1.001599                | 2.308236  | -0.000005 |
| 8                | 2.048253                | -0.117293 | 0.000008  |
| 6                | 2.633079                | -1.409520 | 0.000009  |
| 1                | 3.709780                | -1.248656 | 0.000009  |
| 1                | 2.336221                | -1.965368 | 0.896374  |
| 1                | 2.336221                | -1.965370 | -0.896355 |
| 1                | -1.569003               | 2.622880  | -0.000035 |

*Quinone\_F: Q1*



| Atomic Number | Coordinates (Angstroms) |           |           |
|---------------|-------------------------|-----------|-----------|
|               | X                       | Y         | Z         |
| 6             | 0.181001                | -1.151332 | -0.000052 |
| 6             | 1.564728                | -0.585724 | -0.000052 |
| 6             | 1.826663                | 0.720182  | 0.000000  |
| 6             | 0.704123                | 1.695546  | 0.000285  |
| 6             | -0.680305               | 1.183383  | 0.000062  |
| 6             | -0.937650               | -0.140778 | 0.000006  |
| 1             | 2.838636                | 1.111275  | -0.000089 |
| 1             | -1.456599               | 1.940038  | 0.000019  |
| 8             | 0.934010                | 2.891601  | -0.000173 |
| 8             | -0.018020               | -2.340337 | 0.000170  |
| 8             | -2.129827               | -0.731449 | -0.000033 |
| 6             | -3.270328               | 0.113641  | -0.000005 |
| 1             | -4.132768               | -0.550477 | -0.000063 |
| 1             | -3.279725               | 0.742935  | 0.896751  |
| 1             | -3.279686               | 0.743045  | -0.896684 |
| 9             | 2.521271                | -1.506094 | -0.000123 |

Quinone\_Cl: **Q2**

| Atomic Number | Coordinates (Angstroms) |           |           |
|---------------|-------------------------|-----------|-----------|
|               | X                       | Y         | Z         |
| 6             | -0.209516               | -0.946799 | -0.000428 |
| 6             | -1.354678               | 0.022815  | -0.000034 |
| 6             | -1.156376               | 1.344457  | 0.000050  |
| 6             | 0.220437                | 1.915109  | 0.000120  |
| 6             | 1.365569                | 0.992045  | -0.000071 |
| 6             | 1.175791                | -0.343321 | -0.000165 |
| 1             | -1.974922               | 2.057870  | 0.000184  |

|    |           |           |           |
|----|-----------|-----------|-----------|
| 1  | 2.345321  | 1.455701  | -0.000057 |
| 8  | 0.372804  | 3.123811  | -0.000183 |
| 8  | -0.371724 | -2.140680 | 0.000219  |
| 8  | 2.113143  | -1.286893 | -0.000149 |
| 6  | 3.465738  | -0.857902 | 0.000029  |
| 1  | 4.065422  | -1.766282 | -0.000010 |
| 1  | 3.679719  | -0.265731 | -0.896629 |
| 1  | 3.679547  | -0.265925 | 0.896855  |
| 17 | -2.926509 | -0.679056 | 0.000209  |

Quinone\_Br: **Q4**

| Atomic Number | Coordinates (Angstroms) |           |           |
|---------------|-------------------------|-----------|-----------|
|               | X                       | Y         | Z         |
| 6             | 0.224675                | -0.846396 | 0.000029  |
| 6             | -0.787789               | 0.258429  | 0.000041  |
| 6             | -0.423595               | 1.543628  | 0.000130  |
| 6             | 1.013649                | 1.937997  | 0.000828  |
| 6             | 2.032520                | 0.878675  | 0.000238  |
| 6             | 1.674252                | -0.421361 | 0.000143  |
| 1             | -1.143115               | 2.356401  | -0.000061 |
| 1             | 3.063198                | 1.213914  | 0.000070  |
| 8             | 1.315202                | 3.118522  | -0.000426 |
| 8             | -0.082491               | -2.011821 | 0.000570  |
| 8             | 2.486189                | -1.474334 | -0.000012 |
| 6             | 3.881801                | -1.216699 | -0.000050 |
| 1             | 4.363444                | -2.193011 | -0.000202 |
| 1             | 4.167592                | -0.655974 | -0.896784 |
| 1             | 4.167689                | -0.656211 | 0.896801  |
| 35            | -2.573231               | -0.283706 | -0.000258 |

Quinone\_I: **Q5**

---

| Atomic |  | Coordinates (Angstroms) |           |           |
|--------|--|-------------------------|-----------|-----------|
| Number |  | X                       | Y         | Z         |
| 6      |  | -0.658659               | -0.809841 | 0.000078  |
| 6      |  | 0.306018                | 0.334623  | 0.000033  |
| 6      |  | -0.120888               | 1.601179  | 0.000037  |
| 6      |  | -1.577403               | 1.932560  | 0.000120  |
| 6      |  | -2.547771               | 0.829999  | 0.000078  |
| 6      |  | -2.129366               | -0.452261 | 0.000073  |
| 1      |  | 0.550433                | 2.454395  | -0.000009 |
| 1      |  | -3.592646               | 1.117856  | 0.000059  |
| 8      |  | -1.927594               | 3.099558  | 0.000005  |
| 8      |  | -0.307300               | -1.963474 | 0.000088  |
| 8      |  | -2.891643               | -1.541825 | 0.000058  |
| 6      |  | -4.297569               | -1.350261 | 0.000047  |
| 1      |  | -4.733552               | -2.347789 | 0.000032  |
| 1      |  | -4.609491               | -0.803343 | 0.896650  |
| 1      |  | -4.609470               | -0.803324 | -0.896553 |
| 53     |  | 2.342658                | -0.167695 | -0.000079 |

2) Flaviolin (**N1**) endo structures.

Int1\_F:

---

| Atomic |  | Coordinates (Angstroms) |  |  |
|--------|--|-------------------------|--|--|
|--------|--|-------------------------|--|--|

| Number | X         | Y         | Z         |
|--------|-----------|-----------|-----------|
| 6      | -0.086607 | -1.637567 | 0.419192  |
| 6      | -1.237378 | -1.993535 | -0.394946 |
| 6      | -2.458055 | -1.454808 | -0.186151 |
| 6      | -2.619084 | -0.491036 | 0.929001  |
| 6      | -1.424212 | 0.426233  | 1.147680  |
| 6      | -0.076260 | -0.296640 | 1.128473  |
| 1      | -1.123173 | -2.831153 | -1.067918 |
| 6      | -1.576322 | 1.561695  | 0.101035  |
| 6      | -0.658507 | 1.429333  | -1.063232 |
| 6      | 1.022267  | 0.628142  | 0.498757  |
| 6      | 0.592088  | 1.006258  | -0.881792 |
| 1      | 1.286568  | 0.963508  | -1.703516 |
| 8      | -3.637498 | -0.397960 | 1.574432  |
| 8      | 0.856610  | -2.403377 | 0.515251  |
| 8      | -1.089508 | 1.726918  | -2.321151 |
| 8      | 1.070444  | 1.850787  | 1.236061  |
| 8      | 2.237671  | -0.015354 | 0.585662  |
| 6      | -2.207808 | 2.593002  | -2.462468 |
| 1      | -2.095428 | 3.492410  | -1.859933 |
| 1      | -2.241938 | 2.866261  | -3.509082 |
| 1      | -3.142324 | 2.096301  | -2.203594 |
| 6      | 1.584535  | 1.747172  | 2.556455  |
| 1      | 1.669544  | 2.763869  | 2.920941  |
| 1      | 0.906613  | 1.201655  | 3.214137  |
| 1      | 2.562633  | 1.270778  | 2.566205  |
| 14     | 3.390346  | -0.500616 | -0.526969 |
| 6      | 2.690352  | -1.570788 | -1.884417 |
| 1      | 1.870180  | -1.096899 | -2.422429 |
| 1      | 3.467036  | -1.790040 | -2.618011 |
| 1      | 2.321693  | -2.516612 | -1.494018 |

|   |           |           |           |    |           |           |           |
|---|-----------|-----------|-----------|----|-----------|-----------|-----------|
| 6 | 4.199206  | 1.010999  | -1.267735 | 6  | 0.736933  | 0.693540  | 1.030218  |
| 1 | 3.546742  | 1.545201  | -1.956607 | 6  | 0.443855  | 2.037115  | 0.455101  |
| 1 | 4.499953  | 1.717504  | -0.495587 | 1  | 1.284020  | 2.706636  | 0.366926  |
| 1 | 5.094188  | 0.736956  | -1.826164 | 8  | -1.461964 | -0.071103 | -1.879691 |
| 6 | 4.578769  | -1.456448 | 0.528592  | 8  | -0.205919 | -1.976545 | 2.884366  |
| 1 | 5.362353  | -1.926426 | -0.063152 | 8  | -0.886499 | 3.728626  | -0.389291 |
| 1 | 5.060912  | -0.819128 | 1.267443  | 8  | 1.671149  | 0.962373  | 2.047811  |
| 1 | 4.049094  | -2.242350 | 1.064392  | 8  | 1.279519  | -0.179186 | 0.054942  |
| 1 | 0.205511  | -0.491786 | 2.162338  | 6  | -1.940115 | 4.002748  | -1.306330 |
| 8 | -3.509120 | -1.938720 | -0.857813 | 1  | -2.918305 | 3.958491  | -0.827937 |
| 6 | -4.766725 | -1.247529 | -0.827718 | 1  | -1.767254 | 5.012970  | -1.654734 |
| 1 | -5.313728 | -1.634699 | -1.677978 | 1  | -1.916208 | 3.320553  | -2.155085 |
| 1 | -5.299832 | -1.452092 | 0.092263  | 6  | 2.147705  | -0.137417 | 2.820209  |
| 1 | -4.631135 | -0.174706 | -0.939503 | 1  | 2.362607  | -1.003575 | 2.194687  |
| 1 | -1.347318 | 2.476498  | 0.645661  | 1  | 3.067206  | 0.204008  | 3.283856  |
| 1 | -2.618163 | 1.632408  | -0.204259 | 1  | 1.430421  | -0.419726 | 3.586329  |
| 9 | -1.591241 | 1.012879  | 2.398004  | 14 | 2.631095  | -0.062858 | -0.931119 |

Int1\_CI:

---

| Atomic | Coordinates (Angstroms) |           |           |
|--------|-------------------------|-----------|-----------|
| Number | X                       | Y         | Z         |
| 6      | -0.391067               | -1.527787 | 1.766544  |
| 6      | -0.486850               | -2.404283 | 0.615080  |
| 6      | -0.937577               | -2.000428 | -0.590862 |
| 6      | -1.348686               | -0.589024 | -0.790139 |
| 6      | -1.659454               | 0.182618  | 0.499209  |
| 6      | -0.559873               | -0.025989 | 1.533379  |
| 1      | -0.203667               | -3.435148 | 0.766965  |
| 6      | -1.990278               | 1.630671  | 0.231208  |
| 6      | -0.759757               | 2.449982  | 0.071479  |

|    |           |           |           |
|----|-----------|-----------|-----------|
| 6  | 0.736933  | 0.693540  | 1.030218  |
| 6  | 0.443855  | 2.037115  | 0.455101  |
| 1  | 1.284020  | 2.706636  | 0.366926  |
| 8  | -1.461964 | -0.071103 | -1.879691 |
| 8  | -0.205919 | -1.976545 | 2.884366  |
| 8  | -0.886499 | 3.728626  | -0.389291 |
| 8  | 1.671149  | 0.962373  | 2.047811  |
| 8  | 1.279519  | -0.179186 | 0.054942  |
| 6  | -1.940115 | 4.002748  | -1.306330 |
| 1  | -2.918305 | 3.958491  | -0.827937 |
| 1  | -1.767254 | 5.012970  | -1.654734 |
| 1  | -1.916208 | 3.320553  | -2.155085 |
| 6  | 2.147705  | -0.137417 | 2.820209  |
| 1  | 2.362607  | -1.003575 | 2.194687  |
| 1  | 3.067206  | 0.204008  | 3.283856  |
| 1  | 1.430421  | -0.419726 | 3.586329  |
| 14 | 2.631095  | -0.062858 | -0.931119 |
| 6  | 2.061502  | -0.902734 | -2.489787 |
| 1  | 1.249245  | -0.344132 | -2.955712 |
| 1  | 2.859947  | -1.001379 | -3.224073 |
| 1  | 1.687503  | -1.903555 | -2.277012 |
| 6  | 3.171045  | 1.689893  | -1.252579 |
| 1  | 2.395887  | 2.284828  | -1.732410 |
| 1  | 3.467482  | 2.196519  | -0.335078 |
| 1  | 4.038690  | 1.693066  | -1.912686 |
| 6  | 4.022641  | -1.006752 | -0.128907 |
| 1  | 4.868429  | -1.111942 | -0.807337 |
| 1  | 4.389236  | -0.509560 | 0.768422  |
| 1  | 3.707789  | -2.010874 | 0.153255  |
| 1  | -0.854340 | 0.434352  | 2.475384  |
| 8  | -0.937389 | -2.873360 | -1.605806 |
| 6  | -1.802391 | -2.680144 | -2.737581 |

|    |           |           |           |
|----|-----------|-----------|-----------|
| 1  | -1.885640 | -3.659133 | -3.191899 |
| 1  | -2.783972 | -2.336234 | -2.424689 |
| 1  | -1.369841 | -1.973047 | -3.435530 |
| 1  | -2.576780 | 2.026092  | 1.061705  |
| 1  | -2.624273 | 1.674931  | -0.651315 |
| 17 | -3.215322 | -0.595448 | 1.100443  |

Int1\_Br:

-----

| Atomic | Coordinates (Angstroms) |   |   |
|--------|-------------------------|---|---|
| Number | X                       | Y | Z |

-----

|   |           |           |           |
|---|-----------|-----------|-----------|
| 6 | 0.336791  | -1.654361 | -1.369872 |
| 6 | 0.490238  | -2.321325 | -0.086969 |
| 6 | 0.852177  | -1.682783 | 1.043228  |
| 6 | 1.110230  | -0.226369 | 1.025204  |
| 6 | 1.354308  | 0.383022  | -0.347741 |
| 6 | 0.372244  | -0.126742 | -1.385589 |
| 1 | 0.306124  | -3.385317 | -0.070695 |
| 6 | 1.445100  | 1.884529  | -0.272526 |
| 6 | 0.083873  | 2.465456  | -0.099000 |
| 6 | -1.054854 | 0.481396  | -1.122897 |
| 6 | -1.017320 | 1.826129  | -0.484936 |
| 1 | -1.968189 | 2.327869  | -0.402977 |
| 8 | 1.130918  | 0.451122  | 2.031592  |
| 8 | 0.205353  | -2.296618 | -2.395777 |
| 8 | -0.046249 | 3.733722  | 0.378321  |
| 8 | -1.761243 | 0.695336  | -2.327344 |
| 8 | -1.724106 | -0.469084 | -0.323939 |
| 6 | 0.951113  | 4.228813  | 1.265751  |
| 1 | 0.591285  | 5.195907  | 1.593156  |

|    |           |           |           |
|----|-----------|-----------|-----------|
| 1  | 1.073410  | 3.577756  | 2.129958  |
| 1  | 1.908331  | 4.362513  | 0.765519  |
| 6  | -2.119777 | -0.461364 | -3.079174 |
| 1  | -2.527634 | -1.240901 | -2.437868 |
| 1  | -2.882765 | -0.136020 | -3.778045 |
| 1  | -1.269643 | -0.866308 | -3.624056 |
| 14 | -3.019142 | -0.340429 | 0.735890  |
| 6  | -2.318024 | -0.074870 | 2.438956  |
| 1  | -1.720259 | 0.836604  | 2.477623  |
| 1  | -3.098641 | 0.010981  | 3.194138  |
| 1  | -1.668339 | -0.899077 | 2.733850  |
| 6  | -4.195638 | 1.028668  | 0.259930  |
| 1  | -3.909321 | 1.988401  | 0.686054  |
| 1  | -4.251850 | 1.147554  | -0.821514 |
| 1  | -5.201726 | 0.811686  | 0.617873  |
| 6  | -3.844028 | -2.000563 | 0.592134  |
| 1  | -4.609973 | -2.139464 | 1.353758  |
| 1  | -4.322731 | -2.130002 | -0.376910 |
| 1  | -3.117871 | -2.804591 | 0.706305  |
| 1  | 0.690132  | 0.202085  | -2.373391 |
| 8  | 0.892891  | -2.360165 | 2.200507  |
| 6  | 1.832312  | -1.956782 | 3.214430  |
| 1  | 2.025193  | -2.853386 | 3.789663  |
| 1  | 2.755981  | -1.604449 | 2.764271  |
| 1  | 1.413519  | -1.182403 | 3.846865  |
| 1  | 1.898243  | 2.275088  | -1.183864 |
| 1  | 2.102770  | 2.146086  | 0.551834  |
| 35 | 3.222827  | -0.276178 | -0.814184 |

Int1\_I:

-----

| Atomic | Coordinates (Angstroms) |  |  |
|--------|-------------------------|--|--|
|--------|-------------------------|--|--|

| Number | X         | Y         | Z         |
|--------|-----------|-----------|-----------|
| 6      | 0.353636  | -1.702078 | -1.231537 |
| 6      | 0.413009  | -2.323945 | 0.103800  |
| 6      | 0.578996  | -1.603982 | 1.228080  |
| 6      | 0.714863  | -0.109806 | 1.157639  |
| 6      | 1.080359  | 0.472371  | -0.207316 |
| 6      | 0.237527  | -0.174667 | -1.313504 |
| 1      | 0.327651  | -3.405278 | 0.148574  |
| 6      | 1.025521  | 1.990810  | -0.201197 |
| 6      | -0.394414 | 2.478168  | -0.294056 |
| 6      | -1.261351 | 0.293522  | -1.189266 |
| 6      | -1.388845 | 1.730200  | -0.765141 |
| 1      | -2.378886 | 2.164792  | -0.874160 |
| 8      | 0.548596  | 0.594124  | 2.130064  |
| 8      | 0.412509  | -2.384445 | -2.236061 |
| 8      | -0.634551 | 3.788545  | -0.001350 |
| 8      | -1.932745 | 0.250308  | -2.420962 |
| 8      | -1.858360 | -0.566629 | -0.256461 |
| 6      | -0.050495 | 4.295172  | 1.192661  |
| 1      | -0.575895 | 5.225529  | 1.409979  |
| 1      | -0.186021 | 3.592119  | 2.022653  |
| 1      | 1.015116  | 4.511274  | 1.058140  |
| 6      | -2.148079 | -1.013271 | -3.035468 |
| 1      | -2.403483 | -1.778837 | -2.294457 |
| 1      | -2.990202 | -0.871326 | -3.715866 |
| 1      | -1.266937 | -1.334985 | -3.596760 |
| 14     | -3.325507 | -0.408808 | 0.567303  |
| 6      | -3.183598 | 0.889179  | 1.915478  |
| 1      | -3.226638 | 1.909447  | 1.520856  |
| 1      | -3.996643 | 0.771944  | 2.642136  |
| 1      | -2.232949 | 0.777044  | 2.450337  |
| 6      | -4.700294 | -0.003585 | -0.641815 |
| 1      | -4.547003 | 0.964331  | -1.130394 |
| 1      | -4.761819 | -0.764126 | -1.428164 |
| 1      | -5.667727 | 0.027232  | -0.126384 |
| 6      | -3.542607 | -2.110241 | 1.313815  |
| 1      | -4.463448 | -2.175551 | 1.904197  |
| 1      | -3.585984 | -2.874865 | 0.530200  |
| 1      | -2.699368 | -2.351227 | 1.971330  |
| 1      | 0.601558  | 0.146500  | -2.294728 |
| 8      | 0.538925  | -2.200725 | 2.430089  |
| 6      | 1.379184  | -1.712015 | 3.482252  |
| 1      | 1.585163  | -2.577093 | 4.113378  |
| 1      | 2.319217  | -1.322054 | 3.079808  |
| 1      | 0.868671  | -0.934809 | 4.051022  |
| 1      | 1.587263  | 2.394838  | -1.052064 |
| 1      | 1.507930  | 2.350325  | 0.711220  |
| 53     | 3.216077  | -0.055591 | -0.477211 |

$\pi_{\text{complex\_F}}$ :

| -----  |                         |           |           |
|--------|-------------------------|-----------|-----------|
| Atomic | Coordinates (Angstroms) |           |           |
| Number | X                       | Y         | Z         |
| -----  |                         |           |           |
| 6      | 0.241022                | 0.721008  | -1.732903 |
| 6      | 1.036560                | -0.496407 | -1.677461 |
| 6      | 2.262110                | -0.540337 | -1.111129 |
| 6      | 2.845807                | 0.660230  | -0.465965 |
| 6      | 1.969991                | 1.849519  | -0.471966 |
| 6      | 0.780105                | 1.906254  | -1.073273 |
| 1      | 0.632583                | -1.381234 | -2.146611 |
| 6      | 1.408013                | 0.407320  | 2.203293  |
| 6      | 0.691071                | -0.608627 | 1.674703  |

|    |           |           |           |   |           |           |           |
|----|-----------|-----------|-----------|---|-----------|-----------|-----------|
| 6  | -1.425962 | 0.529640  | 0.931639  | 1 | 4.573895  | -2.749918 | -1.547964 |
| 6  | -0.603398 | -0.544442 | 1.061703  | 1 | 4.724069  | -1.006497 | -1.843219 |
| 1  | -0.942158 | -1.469124 | 0.624964  | 1 | 4.804084  | -1.623192 | -0.189741 |
| 8  | 3.976741  | 0.707901  | -0.008648 | 1 | 0.977499  | 1.389695  | 2.259625  |
| 8  | -0.834283 | 0.774749  | -2.334338 | 1 | 2.389993  | 0.266837  | 2.621214  |
| 8  | 1.153537  | -1.893984 | 1.584383  | 9 | 2.495200  | 2.913293  | 0.135771  |
| 8  | -1.103490 | 1.719252  | 1.456998  |   |           |           |           |
| 8  | -2.579315 | 0.518660  | 0.289510  |   |           |           |           |
| 6  | 2.454594  | -2.144214 | 2.085069  |   |           |           |           |
| 1  | 2.497914  | -1.989659 | 3.163323  |   |           |           |           |
| 1  | 2.667390  | -3.180688 | 1.852476  |   |           |           |           |
| 1  | 3.193829  | -1.505266 | 1.600123  |   |           |           |           |
| 6  | -1.980670 | 2.816363  | 1.174823  |   |           |           |           |
| 1  | -2.953380 | 2.662184  | 1.631860  | 6 | 0.035974  | 0.255295  | -1.686711 |
| 1  | -1.495874 | 3.680398  | 1.610282  | 6 | 0.797758  | -0.970705 | -1.527717 |
| 1  | -2.103977 | 2.945698  | 0.103951  | 6 | 2.056192  | -0.973074 | -1.041691 |
| 14 | -3.522727 | -0.782791 | -0.306410 | 6 | 2.716500  | 0.274181  | -0.581658 |
| 6  | -2.591669 | -1.824801 | -1.525068 | 6 | 1.880337  | 1.495204  | -0.678582 |
| 1  | -1.879104 | -2.500758 | -1.056633 | 6 | 0.655131  | 1.492662  | -1.220834 |
| 1  | -3.292830 | -2.441846 | -2.086841 | 1 | 0.344254  | -1.897411 | -1.844383 |
| 1  | -2.052209 | -1.198519 | -2.234092 | 6 | 1.411143  | 0.388182  | 2.176373  |
| 6  | -4.050881 | -1.763218 | 1.181789  | 6 | 0.610721  | -0.626008 | 1.780292  |
| 1  | -3.193327 | -2.187808 | 1.702197  | 6 | -1.451879 | 0.573943  | 0.971600  |
| 1  | -4.596341 | -1.150843 | 1.896553  | 6 | -0.699017 | -0.535359 | 1.204604  |
| 1  | -4.695782 | -2.592741 | 0.895932  | 1 | -1.112132 | -1.472553 | 0.873813  |
| 6  | -4.912730 | 0.141774  | -1.108015 | 8 | 3.874020  | 0.300656  | -0.198816 |
| 1  | -5.654513 | -0.530285 | -1.534902 | 8 | -1.078485 | 0.280569  | -2.218698 |
| 1  | -5.422931 | 0.787452  | -0.396587 | 8 | 0.990456  | -1.940845 | 1.798133  |
| 1  | -4.537762 | 0.771363  | -1.912884 | 8 | -1.049572 | 1.783865  | 1.384841  |
| 1  | 0.201750  | 2.815890  | -1.103795 | 8 | -2.594929 | 0.579510  | 0.317144  |
| 8  | 2.912168  | -1.720845 | -1.080908 | 6 | 2.294840  | -2.222371 | 2.277464  |
| 6  | 4.345322  | -1.762986 | -1.163471 | 1 | 2.395246  | -1.928000 | 3.322454  |

$\pi$ \_complex\_Cl:

```

-----
Atomic          Coordinates (Angstroms)
Number          X            Y            Z
-----

```

|    |           |           |           | Atomic | Coordinates (Angstroms) |           |           |
|----|-----------|-----------|-----------|--------|-------------------------|-----------|-----------|
|    |           |           |           | Number | X                       | Y         | Z         |
| 1  | 2.422175  | -3.293287 | 2.181046  |        |                         |           |           |
| 1  | 3.053336  | -1.713289 | 1.680754  |        |                         |           |           |
| 6  | -1.797598 | 2.914351  | 0.920813  |        |                         |           |           |
| 1  | -2.799201 | 2.915897  | 1.340399  | 6      | 0.183629                | -0.069829 | -1.683131 |
| 1  | -1.243885 | 3.778509  | 1.264190  | 6      | -0.331340               | 1.279224  | -1.542245 |
| 1  | -1.864947 | 2.912144  | -0.164939 | 6      | -1.568022               | 1.526274  | -1.060932 |
| 14 | -3.654843 | -0.638413 | -0.257669 | 6      | -2.450119               | 0.433468  | -0.577063 |
| 6  | -2.811138 | -2.114698 | -0.998395 | 6      | -1.861213               | -0.921904 | -0.658104 |
| 1  | -2.298225 | -2.751998 | -0.281858 | 6      | -0.662136               | -1.161306 | -1.201049 |
| 1  | -3.568804 | -2.732157 | -1.482483 | 1      | 0.287759                | 2.099577  | -1.872049 |
| 1  | -2.104498 | -1.804618 | -1.765155 | 6      | -1.160036               | 0.153973  | 2.178665  |
| 6  | -4.661274 | -1.122570 | 1.227561  | 6      | -0.183668               | 0.993179  | 1.768000  |
| 1  | -4.023170 | -1.501814 | 2.024373  | 6      | 1.608875                | -0.586682 | 0.969261  |
| 1  | -5.226068 | -0.283661 | 1.628486  | 6      | 1.087038                | 0.648828  | 1.201456  |
| 1  | -5.371522 | -1.910960 | 0.982953  | 1      | 1.681060                | 1.487744  | 0.881363  |
| 6  | -4.605416 | 0.290007  | -1.546006 | 8      | -3.588991               | 0.637384  | -0.190062 |
| 1  | -5.359693 | -0.334632 | -2.020531 | 8      | 1.270348                | -0.319077 | -2.213862 |
| 1  | -5.109111 | 1.162109  | -1.135782 | 8      | -0.310083               | 2.356503  | 1.761818  |
| 1  | -3.919800 | 0.629182  | -2.320342 | 8      | 0.970569                | -1.693172 | 1.371614  |
| 1  | 0.086346  | 2.401285  | -1.335318 | 8      | 2.736430                | -0.814336 | 0.327817  |
| 8  | 2.687607  | -2.156362 | -0.896104 | 6      | -1.535632               | 2.886395  | 2.237425  |
| 6  | 4.084113  | -2.257033 | -1.221171 | 1      | -1.684695               | 2.635794  | 3.288142  |
| 1  | 4.222808  | -3.276175 | -1.563408 | 1      | -1.460830               | 3.960160  | 2.120497  |
| 1  | 4.352049  | -1.566288 | -2.013914 | 1      | -2.378780               | 2.516726  | 1.652007  |
| 1  | 4.704628  | -2.062173 | -0.352619 | 6      | 1.455344                | -2.948036 | 0.876973  |
| 1  | 1.042963  | 1.396709  | 2.151192  | 1      | 2.377151                | -3.231080 | 1.375742  |
| 1  | 2.405214  | 0.227470  | 2.556701  | 1      | 0.672754                | -3.661084 | 1.105935  |
| 17 | 2.612280  | 2.946606  | -0.114467 | 1      | 1.626249                | -2.901307 | -0.195389 |
|    |           |           |           | 14     | 3.998047                | 0.190323  | -0.254390 |
|    |           |           |           | 6      | 3.417278                | 1.742187  | -1.088360 |
|    |           |           |           | 1      | 2.999718                | 2.485936  | -0.413702 |
|    |           |           |           | 1      | 4.270684                | 2.207670  | -1.582828 |

π\_Complex\_Br:

|    |           |           |           |   |           |           |           |
|----|-----------|-----------|-----------|---|-----------|-----------|-----------|
| 1  | 2.681121  | 1.506628  | -1.853941 | 6 | -0.970829 | 0.448756  | 2.276640  |
| 6  | 5.026051  | 0.585696  | 1.242419  | 6 | 0.032418  | 1.206706  | 1.782995  |
| 1  | 4.439599  | 1.134282  | 1.978672  | 6 | 1.657501  | -0.526756 | 0.943910  |
| 1  | 5.410512  | -0.307766 | 1.729603  | 6 | 1.265811  | 0.755124  | 1.157669  |
| 1  | 5.877002  | 1.213094  | 0.982200  | 1 | 1.903083  | 1.541608  | 0.777281  |
| 6  | 4.815498  | -0.947050 | -1.464272 | 8 | -3.268867 | 1.029507  | -0.180203 |
| 1  | 5.650024  | -0.470119 | -1.974162 | 8 | 1.579345  | 0.288934  | -2.278494 |
| 1  | 5.193313  | -1.845615 | -0.980833 | 8 | -0.002720 | 2.574441  | 1.741586  |
| 1  | 4.091763  | -1.250929 | -2.219078 | 8 | 0.922828  | -1.557488 | 1.394257  |
| 1  | -0.272299 | -2.161217 | -1.304597 | 8 | 2.735913  | -0.895858 | 0.264940  |
| 8  | -1.967531 | 2.809374  | -0.948098 | 6 | -1.137916 | 3.213379  | 2.282923  |
| 6  | -3.321730 | 3.159525  | -1.278229 | 1 | -1.227924 | 3.004682  | 3.356553  |
| 1  | -3.272343 | 4.183271  | -1.630648 | 1 | -0.987941 | 4.280918  | 2.120457  |
| 1  | -3.708401 | 2.521871  | -2.067127 | 1 | -2.054118 | 2.893084  | 1.771295  |
| 1  | -3.969921 | 3.086747  | -0.411498 | 6 | 1.368689  | -2.881811 | 1.122661  |
| 1  | -0.987447 | -0.906190 | 2.170419  | 1 | 2.349215  | -3.062141 | 1.570499  |
| 1  | -2.105505 | 0.504405  | 2.555698  | 1 | 0.620324  | -3.531372 | 1.575831  |
| 35 | -2.954171 | -2.340863 | -0.004905 | 1 | 1.424179  | -3.065701 | 0.045874  |

$\pi$ \_Complex\_I:

| -----  |                         |           |           |   |          |           |           |
|--------|-------------------------|-----------|-----------|---|----------|-----------|-----------|
| Atomic | Coordinates (Angstroms) |           |           |   |          |           |           |
| Number | X                       | Y         | Z         |   |          |           |           |
| -----  |                         |           |           |   |          |           |           |
| 6      | 0.496668                | 0.480334  | -1.739978 | 1 | 3.146144 | 1.889592  | -1.306693 |
| 6      | -0.051705               | 1.826918  | -1.539532 | 6 | 5.372617 | -0.345537 | 1.173616  |
| 6      | -1.277238               | 2.019200  | -1.017445 | 1 | 4.988507 | 0.131818  | 2.082585  |
| 6      | -2.141080               | 0.857554  | -0.592388 | 1 | 5.541467 | -1.405147 | 1.392787  |
| 6      | -1.536292               | -0.501701 | -0.751694 | 1 | 6.342112 | 0.110697  | 0.942366  |
| 6      | -0.326639               | -0.675897 | -1.294847 | 6 | 4.647984 | -1.101734 | -1.761308 |
| 1      | 0.561836                | 2.674330  | -1.828373 | 1 | 5.615743 | -0.773060 | -2.156384 |
|        |                         |           |           | 1 | 4.719212 | -2.170809 | -1.534388 |
|        |                         |           |           | 1 | 3.888785 | -0.961674 | -2.537339 |
|        |                         |           |           | 1 | 0.119009 | -1.655877 | -1.440601 |



|    |           |           |           |
|----|-----------|-----------|-----------|
| 8  | -1.705954 | 3.272187  | -0.786492 |
| 6  | -3.066684 | 3.636578  | -1.044307 |
| 1  | -3.036879 | 4.703499  | -1.269681 |
| 1  | -3.463107 | 3.088225  | -1.903269 |
| 1  | -3.692659 | 3.445704  | -0.172124 |
| 1  | -0.878854 | -0.626497 | 2.287098  |
| 1  | -1.873383 | 0.882301  | 2.687556  |
| 53 | -2.702903 | -2.119727 | -0.103542 |

|    |           |           |           |
|----|-----------|-----------|-----------|
| 8  | 1.648984  | -0.908035 | -0.665446 |
| 6  | 0.070967  | 4.816887  | -0.225980 |
| 1  | -0.845827 | 4.780203  | -0.813012 |
| 1  | -0.174538 | 4.901664  | 0.831463  |
| 1  | 0.646324  | 5.684674  | -0.521296 |
| 6  | -0.288181 | -1.610208 | -2.170491 |
| 1  | -0.356042 | -2.395100 | -1.415645 |
| 1  | -1.145230 | -1.672345 | -2.833100 |
| 1  | 0.627487  | -1.762321 | -2.738067 |
| 14 | 3.161120  | -0.981017 | 0.054782  |

3) Flaviolin (N1) exo structures.

DA\_adduct\_F:

| -----  |                         |           |           |
|--------|-------------------------|-----------|-----------|
| Atomic | Coordinates (Angstroms) |           |           |
| Number | X                       | Y         | Z         |
| -----  |                         |           |           |
| 6      | -0.641403               | -1.532930 | 1.013588  |
| 6      | -2.002882               | -1.801819 | 0.582389  |
| 6      | -2.790186               | -0.848461 | 0.034325  |
| 6      | -2.376414               | 0.581673  | -0.010904 |
| 6      | -1.191314               | 0.907943  | 0.901912  |
| 6      | -0.108579               | -0.135524 | 0.801399  |
| 1      | -2.323391               | -2.830077 | 0.656981  |
| 6      | -0.684870               | 2.322054  | 0.760005  |
| 6      | 0.429442                | 2.449956  | -0.221349 |
| 6      | 0.609922                | 0.000759  | -0.572955 |
| 6      | 1.026587                | 1.410100  | -0.804670 |
| 1      | 1.782496                | 1.571811  | -1.558026 |
| 8      | -2.989222               | 1.420557  | -0.620510 |
| 8      | 0.079115                | -2.406965 | 1.469011  |
| 8      | 0.905806                | 3.697046  | -0.494109 |
| 8      | -0.339300               | -0.302229 | -1.616822 |

|   |           |           |           |
|---|-----------|-----------|-----------|
| 6 | 3.133809  | -0.430391 | 1.833947  |
| 1 | 2.453087  | -1.032283 | 2.433260  |
| 1 | 4.130119  | -0.538465 | 2.262944  |
| 1 | 2.859505  | 0.619185  | 1.943310  |
| 6 | 3.579912  | -2.782069 | -0.088465 |
| 1 | 4.559907  | -3.011302 | 0.326669  |
| 1 | 2.842738  | -3.378080 | 0.446331  |
| 1 | 3.578203  | -3.108920 | -1.126995 |
| 6 | 4.347750  | 0.086553  | -0.908293 |
| 1 | 5.373400  | -0.065467 | -0.572636 |
| 1 | 4.318366  | -0.140507 | -1.972854 |
| 1 | 4.127728  | 1.146498  | -0.789444 |
| 1 | -1.525101 | 2.954111  | 0.474676  |
| 1 | -0.353296 | 2.653185  | 1.745034  |
| 9 | -1.761487 | 0.803709  | 2.201430  |
| 1 | 0.625808  | 0.060415  | 1.580368  |
| 8 | -3.992661 | -1.031715 | -0.510571 |
| 6 | -4.487132 | -2.368175 | -0.547620 |
| 1 | -3.801753 | -3.014439 | -1.093436 |
| 1 | -4.631040 | -2.751085 | 0.460723  |
| 1 | -5.437601 | -2.317855 | -1.060524 |

| DA_adduct_Cl: |                         |           |           |
|---------------|-------------------------|-----------|-----------|
| Atomic        | Coordinates (Angstroms) |           |           |
| Number        | X                       | Y         | Z         |
| 6             | -0.514284               | -1.596394 | 0.891447  |
| 6             | -1.829115               | -1.932752 | 0.373731  |
| 6             | -2.637824               | -1.009389 | -0.191388 |
| 6             | -2.298944               | 0.443969  | -0.200666 |
| 6             | -1.165313               | 0.832440  | 0.748658  |
| 6             | -0.039867               | -0.174229 | 0.698389  |
| 1             | -2.100224               | -2.976616 | 0.422414  |
| 6             | -0.704065               | 2.264359  | 0.580754  |
| 6             | 0.378081                | 2.411110  | -0.434223 |
| 6             | 0.722440                | -0.034110 | -0.661810 |
| 6             | 1.051739                | 1.385235  | -0.952343 |
| 1             | 1.799729                | 1.554984  | -1.712395 |
| 8             | -2.915135               | 1.250861  | -0.848662 |
| 8             | 0.220631                | -2.429011 | 1.398274  |
| 8             | 0.764032                | 3.671764  | -0.777777 |
| 8             | -0.146803               | -0.445078 | -1.733983 |
| 8             | 1.824785                | -0.871767 | -0.660248 |
| 6             | -0.167393               | 4.735215  | -0.612554 |
| 1             | -1.088079               | 4.546286  | -1.162289 |
| 1             | -0.397012               | 4.916289  | 0.436005  |
| 1             | 0.320282                | 5.611397  | -1.020875 |
| 6             | 0.029535                | -1.761552 | -2.239858 |
| 1             | -0.028397               | -2.527773 | -1.465486 |
| 1             | -0.780558               | -1.903541 | -2.947610 |
| 1             | 0.985388                | -1.863808 | -2.749353 |
| 14            | 3.291953                | -0.814467 | 0.149808  |
| 6             | 3.116269                | -0.229828 | 1.910420  |

|    |           |           |           |
|----|-----------|-----------|-----------|
| 1  | 2.449355  | -0.869548 | 2.485628  |
| 1  | 4.091458  | -0.255264 | 2.397291  |
| 1  | 2.759700  | 0.798428  | 1.981080  |
| 6  | 3.846856  | -2.582451 | 0.084066  |
| 1  | 4.814912  | -2.728927 | 0.560070  |
| 1  | 3.124013  | -3.216216 | 0.594848  |
| 1  | 3.927789  | -2.936042 | -0.942436 |
| 6  | 4.450898  | 0.322716  | -0.765198 |
| 1  | 5.457569  | 0.271761  | -0.350603 |
| 1  | 4.520541  | 0.064442  | -1.820533 |
| 1  | 4.130356  | 1.361571  | -0.698749 |
| 1  | -1.573530 | 2.864152  | 0.318116  |
| 1  | -0.342176 | 2.638625  | 1.539250  |
| 17 | -1.974414 | 0.732885  | 2.403151  |
| 1  | 0.672046  | 0.051450  | 1.488774  |
| 8  | -3.804914 | -1.239986 | -0.791757 |
| 6  | -4.210628 | -2.600049 | -0.916525 |
| 1  | -3.479425 | -3.163300 | -1.493161 |
| 1  | -4.339043 | -3.058823 | 0.061551  |
| 1  | -5.158050 | -2.576025 | -1.436584 |

| DA_adduct_Br: |                         |           |           |
|---------------|-------------------------|-----------|-----------|
| Atomic        | Coordinates (Angstroms) |           |           |
| Number        | X                       | Y         | Z         |
| 6             | -0.192445               | -1.568125 | 0.793131  |
| 6             | -1.361955               | -2.144237 | 0.164487  |
| 6             | -2.209528               | -1.406808 | -0.587369 |
| 6             | -2.086418               | 0.076733  | -0.711129 |
| 6             | -1.136649               | 0.722560  | 0.289467  |

|    |           |           |           |    |             |             |             |
|----|-----------|-----------|-----------|----|-------------|-------------|-------------|
| 6  | 0.099564  | -0.113452 | 0.509507  | 1  | 4.431147    | 1.495908    | -0.495087   |
| 1  | -1.486353 | -3.209318 | 0.287441  | 1  | -1.700729   | 2.577841    | -0.561500   |
| 6  | -0.850044 | 2.184269  | -0.003961 | 1  | -0.802907   | 2.744561    | 0.929600    |
| 6  | 0.420374  | 2.406837  | -0.754759 | 35 | -2.252632   | 0.688385    | 1.996698    |
| 6  | 1.010551  | 0.011921  | -0.759956 | 1  | 0.662237    | 0.285920    | 1.349269    |
| 6  | 1.284423  | 1.440851  | -1.062180 | 8  | -3.234747   | -1.875027   | -1.297667   |
| 1  | 2.161090  | 1.657247  | -1.653573 | 6  | -3.422295   | -3.288512   | -1.294502   |
| 8  | -2.742550 | 0.716065  | -1.494692 | 1  | -4.274088   | -3.473809   | -1.934313   |
| 8  | 0.583237  | -2.235116 | 1.462077  | 1  | -2.540019   | -3.789168   | -1.689237   |
| 8  | 0.748645  | 3.691607  | -1.071096 | 1  | -3.628383   | -3.646816   | -0.287837   |
| 8  | 0.270750  | -0.493083 | -1.891839 |    |             |             |             |
| 8  | 2.147867  | -0.756008 | -0.609230 |    |             |             |             |
| 6  | -0.298852 | 4.647830  | -1.188694 |    |             |             |             |
| 1  | -1.002168 | 4.372188  | -1.972092 |    |             |             |             |
| 1  | -0.834207 | 4.786496  | -0.250868 |    |             |             |             |
| 1  | 0.185656  | 5.578769  | -1.453792 |    |             |             |             |
| 6  | 0.602267  | -1.791578 | -2.361302 | 6  | 0.00180504  | 1.75577000  | -0.82834800 |
| 1  | 0.626716  | -2.540013 | -1.568076 | 6  | -0.84164000 | 2.76440000  | -0.21741100 |
| 1  | -0.179101 | -2.043097 | -3.073237 | 6  | -1.70483000 | 2.46473000  | 0.77872300  |
| 1  | 1.567164  | -1.793212 | -2.866302 | 6  | -1.97997000 | 1.05699000  | 1.20297000  |
| 14 | 3.483636  | -0.622310 | 0.401095  | 6  | -1.42249000 | -0.00616040 | 0.27954900  |
| 6  | 3.070600  | 0.100435  | 2.066769  | 6  | -0.05807090 | 0.36628700  | -0.23790400 |
| 1  | 2.356687  | -0.514309 | 2.611284  | 1  | -0.70329800 | 3.77569000  | -0.56900500 |
| 1  | 3.979030  | 0.161684  | 2.666509  | 6  | -1.50207000 | -1.40440000 | 0.85362200  |
| 1  | 2.679661  | 1.115655  | 1.992987  | 6  | -0.28121300 | -1.78292000 | 1.62423000  |
| 6  | 4.064305  | -2.377680 | 0.545218  | 6  | 0.98708300  | 0.23139900  | 0.93212200  |
| 1  | 4.942127  | -2.467977 | 1.183032  | 6  | 0.85116500  | -1.08192000 | 1.61457000  |
| 1  | 3.273969  | -2.991207 | 0.974347  | 1  | 1.68859000  | -1.39378000 | 2.22185000  |
| 1  | 4.316511  | -2.794815 | -0.428043 | 8  | -2.64034000 | 0.79913500  | 2.18221000  |
| 6  | 4.753883  | 0.457776  | -0.431830 | 8  | 0.77754100  | 2.01215000  | -1.73715000 |
| 1  | 5.690989  | 0.448358  | 0.124365  | 8  | -0.29632000 | -2.96244000 | 2.30567000  |
| 1  | 4.973889  | 0.117593  | -1.442424 | 8  | 0.69970800  | 1.21222000  | 1.94249000  |

DA\_adduct\_I:

| -----  |                         |   |   |
|--------|-------------------------|---|---|
| Atomic | Coordinates (Angstroms) |   |   |
| Number | X                       | Y | Z |
| -----  |                         |   |   |

|   |             |             |             |
|---|-------------|-------------|-------------|
| 6 | 0.00180504  | 1.75577000  | -0.82834800 |
| 6 | -0.84164000 | 2.76440000  | -0.21741100 |
| 6 | -1.70483000 | 2.46473000  | 0.77872300  |
| 6 | -1.97997000 | 1.05699000  | 1.20297000  |
| 6 | -1.42249000 | -0.00616040 | 0.27954900  |
| 6 | -0.05807090 | 0.36628700  | -0.23790400 |
| 1 | -0.70329800 | 3.77569000  | -0.56900500 |
| 6 | -1.50207000 | -1.40440000 | 0.85362200  |
| 6 | -0.28121300 | -1.78292000 | 1.62423000  |
| 6 | 0.98708300  | 0.23139900  | 0.93212200  |
| 6 | 0.85116500  | -1.08192000 | 1.61457000  |
| 1 | 1.68859000  | -1.39378000 | 2.22185000  |
| 8 | -2.64034000 | 0.79913500  | 2.18221000  |
| 8 | 0.77754100  | 2.01215000  | -1.73715000 |
| 8 | -0.29632000 | -2.96244000 | 2.30567000  |
| 8 | 0.69970800  | 1.21222000  | 1.94249000  |

|    |             |             |             | $\pi_{\text{complex\_F}}$ |                         |           |           |
|----|-------------|-------------|-------------|---------------------------|-------------------------|-----------|-----------|
|    |             |             |             | -----                     |                         |           |           |
|    |             |             |             | Atomic                    | Coordinates (Angstroms) |           |           |
|    |             |             |             | Number                    | X                       | Y         | Z         |
|    |             |             |             | -----                     |                         |           |           |
| 8  | 2.25451000  | 0.47667500  | 0.44342800  |                           |                         |           |           |
| 6  | -1.55177000 | -3.55438000 | 2.60693000  |                           |                         |           |           |
| 1  | -2.10889000 | -3.81894000 | 1.70842000  |                           |                         |           |           |
| 1  | -1.32267000 | -4.45929000 | 3.15785000  |                           |                         |           |           |
| 1  | -2.16191000 | -2.90353000 | 3.23261000  |                           |                         |           |           |
| 6  | 1.48312000  | 2.39470000  | 1.92915000  | 6                         | 0.319650                | 0.719022  | 1.652005  |
| 1  | 1.51977000  | 2.87605000  | 0.95160500  | 6                         | 1.230594                | 1.616336  | 0.968748  |
| 1  | 1.00900000  | 3.06594000  | 2.64143000  | 6                         | 2.437640                | 1.201932  | 0.522443  |
| 1  | 2.50469000  | 2.19083000  | 2.24592000  | 6                         | 2.931086                | -0.183037 | 0.767396  |
| 14 | 3.26251000  | -0.41239200 | -0.55374600 | 6                         | 1.963268                | -1.061200 | 1.439637  |
| 6  | 2.32026000  | -1.43789000 | -1.79534000 | 6                         | 0.758396                | -0.666274 | 1.859009  |
| 1  | 1.25740000  | -1.20290000 | -1.79511000 | 1                         | 0.877104                | 2.625379  | 0.821925  |
| 1  | 2.70003000  | -1.23883000 | -2.79738000 | 6                         | 1.661961                | -0.399122 | -2.008175 |
| 1  | 2.44298000  | -2.50680000 | -1.61529000 | 6                         | 0.715288                | -1.203188 | -1.476662 |
| 6  | 4.28343000  | 0.89889600  | -1.37929000 | 6                         | -1.198808               | 0.375274  | -1.047119 |
| 1  | 5.04653000  | 0.46967900  | -2.02718000 | 6                         | -0.601276               | -0.843453 | -1.031263 |
| 1  | 3.64255000  | 1.54004000  | -1.98144000 | 1                         | -1.171548               | -1.654245 | -0.607771 |
| 1  | 4.78526000  | 1.52498000  | -0.64292700 | 8                         | 4.060026                | -0.540271 | 0.496351  |
| 6  | 4.29810000  | -1.53702000 | 0.51454500  | 8                         | -0.783976               | 1.101496  | 2.050543  |
| 1  | 5.06336000  | -2.04321000 | -0.07321360 | 8                         | 0.912468                | -2.533193 | -1.217190 |
| 1  | 4.80161000  | -0.98063700 | 1.30345000  | 8                         | -0.594325               | 1.446228  | -1.584726 |
| 1  | 3.68912000  | -2.30621000 | 0.98802400  | 8                         | -2.388512               | 0.639134  | -0.543056 |
| 1  | -2.38833000 | -1.45312000 | 1.48474000  | 6                         | 2.182472                | -3.074153 | -1.549527 |
| 1  | -1.63968000 | -2.13496000 | 0.05457330  | 1                         | 2.978966                | -2.583203 | -0.991834 |
| 1  | 0.25551900  | -0.33501500 | -1.00391000 | 1                         | 2.140549                | -4.119841 | -1.271681 |
| 8  | -2.42537000 | 3.33651000  | 1.48451000  | 1                         | 2.377661                | -2.983870 | -2.618018 |
| 6  | -2.19724000 | 4.71396000  | 1.21285000  | 6                         | -1.245866               | 2.709710  | -1.400469 |
| 1  | -2.47831000 | 4.96278000  | 0.19029800  | 1                         | -1.454135               | 2.888831  | -0.349207 |
| 1  | -2.82057000 | 5.26580000  | 1.90560000  | 1                         | -0.551789               | 3.447533  | -1.782257 |
| 1  | -1.14829000 | 4.96591000  | 1.37244000  | 1                         | -2.173468               | 2.751111  | -1.964185 |
| 53 | -2.89935000 | 0.03768600  | -1.42328000 | 14                        | -3.579509               | -0.312309 | 0.228552  |
|    |             |             |             | 6                         | -2.875431               | -1.369171 | 1.579085  |

|               |                         |           |           |    |           |           |           |
|---------------|-------------------------|-----------|-----------|----|-----------|-----------|-----------|
| 1             | -2.249276               | -0.763117 | 2.232144  | 6  | -0.693910 | -0.547439 | -1.709778 |
| 1             | -3.691910               | -1.771480 | 2.179700  | 1  | -0.844388 | 2.815855  | -0.943409 |
| 1             | -2.293384               | -2.215678 | 1.221371  | 6  | -1.480596 | 0.023584  | 2.105361  |
| 6             | -4.671212               | 1.014626  | 0.919532  | 6  | -0.570352 | -0.885096 | 1.693491  |
| 1             | -5.519630               | 0.609531  | 1.467370  | 6  | 1.381108  | 0.544331  | 0.989613  |
| 1             | -4.098797               | 1.633259  | 1.609764  | 6  | 0.746271  | -0.641907 | 1.173717  |
| 1             | -5.062210               | 1.662896  | 0.137942  | 1  | 1.288780  | -1.529920 | 0.892958  |
| 6             | -4.385423               | -1.323513 | -1.105570 | 8  | -3.973609 | -0.337638 | -0.297686 |
| 1             | -5.175629               | -1.953077 | -0.699713 | 8  | 0.846356  | 1.196073  | -2.028615 |
| 1             | -4.831599               | -0.693652 | -1.872903 | 8  | -0.809952 | -2.231092 | 1.657210  |
| 1             | -3.670197               | -1.979381 | -1.598986 | 8  | 0.819692  | 1.704756  | 1.356675  |
| 1             | 1.434237                | 0.633043  | -2.201155 | 8  | 2.574397  | 0.686267  | 0.442887  |
| 1             | 2.638062                | -0.758545 | -2.283757 | 6  | -2.080793 | -2.672167 | 2.110150  |
| 9             | 2.392487                | -2.310438 | 1.630273  | 1  | -2.885137 | -2.227071 | 1.525232  |
| 1             | 0.094512                | -1.342301 | 2.375253  | 1  | -2.087975 | -3.745923 | 1.968515  |
| 8             | 3.337839                | 1.933051  | -0.139012 | 1  | -2.222499 | -2.435992 | 3.164412  |
| 6             | 2.950050                | 3.253960  | -0.491019 | 6  | 1.462189  | 2.903259  | 0.895828  |
| 1             | 3.774798                | 3.662606  | -1.059846 | 1  | 1.590002  | 2.876479  | -0.183956 |
| 1             | 2.049026                | 3.233827  | -1.105592 | 1  | 0.795190  | 3.706636  | 1.182183  |
| 1             | 2.776897                | 3.858579  | 0.397644  | 1  | 2.427001  | 3.034257  | 1.375452  |
|               |                         |           |           | 14 | 3.672643  | -0.441012 | -0.217385 |
|               |                         |           |           | 6  | 2.848014  | -1.523677 | -1.477514 |
|               |                         |           |           | 1  | 2.355180  | -0.903623 | -2.225358 |
|               |                         |           |           | 1  | 3.592826  | -2.133266 | -1.988474 |
|               |                         |           |           | 1  | 2.108761  | -2.203489 | -1.058725 |
|               |                         |           |           | 6  | 4.906175  | 0.687135  | -1.014479 |
|               |                         |           |           | 1  | 5.728933  | 0.136941  | -1.465971 |
|               |                         |           |           | 1  | 4.424363  | 1.266990  | -1.800426 |
|               |                         |           |           | 1  | 5.332224  | 1.388639  | -0.300304 |
|               |                         |           |           | 6  | 4.377551  | -1.406042 | 1.205910  |
|               |                         |           |           | 1  | 5.106750  | -2.136616 | 0.859355  |
|               |                         |           |           | 1  | 4.883485  | -0.754403 | 1.915378  |
| π_complex_Cl: |                         |           |           |    |           |           |           |
| -----         |                         |           |           |    |           |           |           |
| Atomic        | Coordinates (Angstroms) |           |           |    |           |           |           |
| Number        | X                       | Y         | Z         |    |           |           |           |
| -----         |                         |           |           |    |           |           |           |
| 6             | -0.264700               | 0.852473  | -1.613365 |    |           |           |           |
| 6             | -1.182200               | 1.793350  | -1.007788 |    |           |           |           |
| 6             | -2.365425               | 1.390026  | -0.498232 |    |           |           |           |
| 6             | -2.850620               | -0.017525 | -0.626991 |    |           |           |           |
| 6             | -1.886209               | -0.948184 | -1.248901 |    |           |           |           |

|    |           |           |           |   |           |           |           |
|----|-----------|-----------|-----------|---|-----------|-----------|-----------|
| 1  | 3.609859  | -1.950061 | 1.752581  | 8 | 1.436444  | 1.933779  | 1.109900  |
| 1  | -1.214151 | 1.063867  | 2.135522  | 8 | 2.919490  | 0.489565  | 0.292959  |
| 1  | -2.462567 | -0.254058 | 2.446798  | 6 | -2.103358 | -1.668933 | 2.716326  |
| 17 | -2.412421 | -2.579412 | -1.394912 | 1 | -2.870454 | -1.199345 | 2.100844  |
| 1  | -0.008510 | -1.236194 | -2.179149 | 1 | -2.297423 | -2.732469 | 2.779994  |
| 8  | -3.255848 | 2.155581  | 0.137372  | 1 | -2.115055 | -1.228546 | 3.713020  |
| 6  | -2.873523 | 3.502666  | 0.384710  | 6 | 2.243319  | 2.915946  | 0.442595  |
| 1  | -3.682986 | 3.943992  | 0.951680  | 1 | 2.290044  | 2.710261  | -0.624521 |
| 1  | -1.952454 | 3.535194  | 0.968491  | 1 | 1.746621  | 3.859988  | 0.628441  |
| 1  | -2.734693 | 4.045629  | -0.549035 | 1 | 3.246862  | 2.937808  | 0.855406  |

$\pi$ \_complex\_Br:

| -----  |                         |           |           |    |           |           |           |
|--------|-------------------------|-----------|-----------|----|-----------|-----------|-----------|
| Atomic | Coordinates (Angstroms) |           |           |    |           |           |           |
| Number | X                       | Y         | Z         |    |           |           |           |
| -----  |                         |           |           |    |           |           |           |
| 6      | 0.042353                | 0.850425  | -1.653525 | 1  | 1.939590  | -2.543449 | -0.708974 |
| 6      | -0.661853               | 2.019127  | -1.174781 | 6  | 5.141432  | -0.160191 | -1.197600 |
| 6      | -1.861886               | 1.913484  | -0.565135 | 1  | 5.856823  | -0.913821 | -1.520728 |
| 6      | -2.586075               | 0.609824  | -0.445131 | 1  | 4.742934  | 0.320789  | -2.089265 |
| 6      | -1.834465               | -0.557229 | -0.941759 | 1  | 5.687608  | 0.591607  | -0.631489 |
| 6      | -0.623921               | -0.450559 | -1.502286 | 6  | 4.367050  | -1.752853 | 1.339641  |
| 1      | -0.153426               | 2.963847  | -1.288919 | 1  | 4.931754  | -2.651409 | 1.096531  |
| 6      | -1.065507               | 0.836677  | 2.194470  | 1  | 5.021079  | -1.105769 | 1.920628  |
| 6      | -0.356515               | -0.276123 | 1.906084  | 1  | 3.545487  | -2.053102 | 1.986667  |
| 6      | 1.759707                | 0.649472  | 0.902831  | 1  | -0.627604 | 1.802871  | 2.025060  |
| 6      | 0.939909                | -0.360548 | 1.292935  | 1  | -2.048420 | 0.800622  | 2.630688  |
| 1      | 1.291932                | -1.365329 | 1.122731  | 35 | -2.720582 | -2.238864 | -0.803856 |
| 8      | -3.724411               | 0.554993  | -0.027837 | 1  | -0.091388 | -1.310579 | -1.877987 |
| 8      | 1.165864                | 0.921530  | -2.160514 | 8  | -2.567104 | 2.913412  | -0.030713 |
| 8      | -0.820371               | -1.544401 | 2.122128  | 6  | -1.948330 | 4.193918  | -0.021309 |
|        |                         |           |           | 1  | -2.634381 | 4.853667  | 0.493649  |
|        |                         |           |           | 1  | -0.999999 | 4.154036  | 0.516278  |
|        |                         |           |           | 1  | -1.779376 | 4.551787  | -1.035864 |

π\_complex\_I:

---

| Atomic<br>Number | Coordinates (Angstroms) |           |           |
|------------------|-------------------------|-----------|-----------|
|                  | X                       | Y         | Z         |
| 6                | 0.401072                | 0.920427  | -1.661922 |
| 6                | -0.073492               | 2.215566  | -1.234444 |
| 6                | -1.251080               | 2.350751  | -0.590318 |
| 6                | -2.186137               | 1.201296  | -0.383069 |
| 6                | -1.665366               | -0.105887 | -0.822227 |
| 6                | -0.472120               | -0.234761 | -1.414469 |
| 1                | 0.583387                | 3.051956  | -1.415380 |
| 6                | -0.560358               | 1.296370  | 2.195492  |
| 6                | -0.066214               | 0.063862  | 1.956204  |
| 6                | 2.134093                | 0.547397  | 0.833706  |
| 6                | 1.161750                | -0.279729 | 1.297179  |
| 1                | 1.324947                | -1.336749 | 1.161558  |
| 8                | -3.307902               | 1.375854  | 0.051615  |
| 8                | 1.496210                | 0.769485  | -2.214238 |
| 8                | -0.719330               | -1.088355 | 2.296801  |
| 8                | 2.054846                | 1.874828  | 0.993992  |
| 8                | 3.224599                | 0.155286  | 0.207070  |
| 6                | -1.943444               | -0.945025 | 2.994674  |
| 1                | -2.680532               | -0.400111 | 2.403298  |
| 1                | -2.305435               | -1.951531 | 3.176558  |
| 1                | -1.793331               | -0.428716 | 3.944181  |
| 6                | 2.974766                | 2.668295  | 0.235983  |
| 1                | 2.946927                | 2.390901  | -0.815743 |
| 1                | 2.641080                | 3.691689  | 0.366173  |
| 1                | 3.987245                | 2.560935  | 0.615734  |

|    |           |           |           |
|----|-----------|-----------|-----------|
| 14 | 3.787128  | -1.396981 | -0.200918 |
| 6  | 2.536067  | -2.315079 | -1.218060 |
| 1  | 2.165319  | -1.663636 | -2.008546 |
| 1  | 3.009540  | -3.177859 | -1.686783 |
| 1  | 1.687558  | -2.678378 | -0.641620 |
| 6  | 5.294592  | -0.980946 | -1.197502 |
| 1  | 5.843577  | -1.876536 | -1.483431 |
| 1  | 5.016678  | -0.455399 | -2.109764 |
| 1  | 5.973068  | -0.340926 | -0.635885 |
| 6  | 4.203633  | -2.263693 | 1.392080  |
| 1  | 4.575460  | -3.269868 | 1.202806  |
| 1  | 4.975078  | -1.725627 | 1.939924  |
| 1  | 3.335406  | -2.351756 | 2.042159  |
| 1  | 0.021042  | 2.160537  | 1.937471  |
| 1  | -1.505888 | 1.453995  | 2.683438  |
| 53 | -2.942986 | -1.753316 | -0.538920 |
| 1  | -0.094919 | -1.189312 | -1.749120 |
| 8  | -1.754538 | 3.489231  | -0.104500 |
| 6  | -0.915052 | 4.631512  | -0.184960 |
| 1  | -1.451065 | 5.436929  | 0.304088  |
| 1  | 0.029578  | 4.450969  | 0.331594  |
| 1  | -0.713615 | 4.899191  | -1.223125 |

TS1\_F:

---

| Atomic<br>Number | Coordinates (Angstroms) |           |           |
|------------------|-------------------------|-----------|-----------|
|                  | X                       | Y         | Z         |
| 6                | 0.416493                | -1.250300 | -1.067603 |
| 6                | 1.575990                | -1.974205 | -0.468003 |
| 6                | 2.746193                | -1.360410 | -0.210003 |





|    |           |           |           |
|----|-----------|-----------|-----------|
| 6  | -0.294604 | 2.052408  | -1.047506 |
| 6  | 1.267810  | 0.115879  | -1.139906 |
| 6  | 0.970200  | 1.459096  | -0.934896 |
| 1  | 1.791393  | 2.094539  | -0.621864 |
| 8  | -3.980087 | 0.148400  | 0.360777  |
| 8  | 0.887983  | -1.871222 | 1.287121  |
| 8  | -0.257131 | 3.385285  | -0.870227 |
| 8  | 0.434070  | -0.676835 | -1.795805 |
| 8  | 2.412048  | -0.424980 | -0.842465 |
| 6  | -1.428985 | 4.157311  | -1.101620 |
| 1  | -2.191923 | 3.953945  | -0.346462 |
| 1  | -1.107507 | 5.195985  | -1.030537 |
| 1  | -1.825397 | 3.959187  | -2.103301 |
| 6  | 0.826813  | -2.041340 | -2.013387 |
| 1  | 1.104562  | -2.511522 | -1.068147 |
| 1  | -0.054277 | -2.515600 | -2.444009 |
| 1  | 1.661413  | -2.075560 | -2.717623 |
| 14 | 3.612947  | -0.229372 | 0.389641  |
| 6  | 2.958688  | 0.598342  | 1.923846  |
| 1  | 2.259995  | -0.070552 | 2.433772  |
| 1  | 3.809025  | 0.791543  | 2.590540  |
| 1  | 2.465972  | 1.556739  | 1.732209  |
| 6  | 4.156067  | -1.980873 | 0.696205  |
| 1  | 4.960787  | -2.024028 | 1.438552  |
| 1  | 3.300102  | -2.550781 | 1.073060  |
| 1  | 4.518423  | -2.450675 | -0.224548 |
| 6  | 4.936557  | 0.809182  | -0.432877 |
| 1  | 5.814967  | 0.892958  | 0.217500  |
| 1  | 5.261303  | 0.361408  | -1.378087 |
| 1  | 4.583443  | 1.825019  | -0.643415 |
| 1  | -1.477279 | 0.383744  | -1.607956 |
| 1  | -2.438634 | 1.872579  | -1.196218 |

|    |           |           |           |
|----|-----------|-----------|-----------|
| 1  | 0.241008  | 0.640114  | 1.775629  |
| 8  | -3.542643 | -2.352489 | -0.376452 |
| 6  | -3.368072 | -3.738196 | -0.596342 |
| 1  | -4.317133 | -4.103598 | -0.986304 |
| 1  | -2.570584 | -3.919318 | -1.327916 |
| 1  | -3.125353 | -4.250865 | 0.341886  |
| 17 | -2.169920 | 2.110877  | 1.643507  |

TS1\_Br:

| -----  |                         |           |           |
|--------|-------------------------|-----------|-----------|
| Atomic | Coordinates (Angstroms) |           |           |
| Number | X                       | Y         | Z         |
| -----  |                         |           |           |
| 6      | 0.142035                | 1.470256  | -1.051856 |
| 6      | -0.778267               | 2.504818  | -0.507643 |
| 6      | -2.028817               | 2.202868  | -0.109461 |
| 6      | -2.574734               | 0.802863  | -0.247998 |
| 6      | -1.536699               | -0.259069 | -0.509516 |
| 6      | -0.322601               | 0.123628  | -1.096139 |
| 1      | -0.379907               | 3.514036  | -0.472511 |
| 6      | -1.418291               | -0.765678 | 1.405295  |
| 6      | -0.326708               | -1.666754 | 1.417319  |
| 6      | 1.496290                | 0.007476  | 1.188949  |
| 6      | 0.998404                | -1.291097 | 1.162788  |
| 1      | 1.690662                | -2.075308 | 0.876266  |
| 8      | -3.751581               | 0.575388  | -0.112026 |
| 8      | 1.282111                | 1.818459  | -1.417856 |

|    |           |           |           |    |             |             |             |
|----|-----------|-----------|-----------|----|-------------|-------------|-------------|
| 8  | -0.499543 | -3.001659 | 1.403146  | 35 | -2.282984   | -1.876736   | -1.255231   |
| 8  | 0.834042  | 0.979468  | 1.799440  |    |             |             |             |
| 8  | 2.681416  | 0.340052  | 0.768421  |    |             |             |             |
| 6  | -1.729038 | -3.552420 | 1.858840  |    |             |             |             |
| 1  | -2.537425 | -3.362203 | 1.148292  |    |             |             |             |
| 1  | -1.553513 | -4.625211 | 1.935769  |    |             |             |             |
| 1  | -1.987498 | -3.145551 | 2.842433  |    |             |             |             |
| 6  | 1.437361  | 2.282265  | 1.847435  |    |             |             |             |
| 1  | 1.723338  | 2.607689  | 0.845552  | 6  | 0.03566810  | 1.54379000  | -1.03595000 |
| 1  | 0.664835  | 2.927732  | 2.263825  | 6  | -0.94757000 | 2.58239000  | -0.63609400 |
| 1  | 2.309907  | 2.258586  | 2.504574  | 6  | -2.18619000 | 2.25336000  | -0.23705700 |
| 14 | 3.767001  | -0.205630 | -0.464100 | 6  | -2.70078000 | 0.81450000  | -0.18207900 |
| 6  | 2.911656  | -1.071963 | -1.875006 | 6  | -1.63176000 | -0.20970100 | -0.51360900 |
| 1  | 2.311882  | -0.356876 | -2.444449 | 6  | -0.42595000 | 0.16200300  | -1.02028000 |
| 1  | 3.689764  | -1.475608 | -2.535767 | 1  | -0.58592400 | 3.60407000  | -0.70085900 |
| 1  | 2.277541  | -1.908057 | -1.563571 | 6  | -1.40409000 | -0.62923400 | 1.47911000  |
| 6  | 4.587367  | 1.375132  | -0.996196 | 6  | -0.48276300 | -1.66779000 | 1.50420000  |
| 1  | 5.346365  | 1.189515  | -1.764324 | 6  | 1.65366000  | -0.42691800 | 1.22153000  |
| 1  | 3.825244  | 2.043370  | -1.411131 | 6  | 0.91068400  | -1.58040000 | 1.21697000  |
| 1  | 5.074360  | 1.874802  | -0.152061 | 1  | 1.41412000  | -2.51195000 | 0.93476200  |
| 6  | 4.925454  | -1.368951 | 0.436441  | 8  | -3.84003000 | 0.55549000  | 0.09536730  |
| 1  | 5.728585  | -1.703144 | -0.230468 | 8  | 1.17804000  | 1.86085000  | -1.34211000 |
| 1  | 5.388159  | -0.880256 | 1.300210  | 8  | -0.79923200 | -2.97671000 | 1.72246000  |
| 1  | 4.401153  | -2.262206 | 0.794608  | 8  | 1.18349000  | 0.69647100  | 1.82105000  |
| 1  | -1.235647 | 0.210920  | 1.837861  | 8  | 2.87601000  | -0.34868100 | 0.77339300  |
| 1  | -2.412541 | -1.160398 | 1.592004  | 6  | -2.15788000 | -3.32656000 | 2.10368000  |
| 1  | 0.309275  | -0.619512 | -1.561406 | 1  | -2.85968000 | -3.06502000 | 1.29999000  |
| 8  | -2.949848 | 3.045714  | 0.381183  | 1  | -2.08051000 | -4.41391000 | 2.22166000  |
| 6  | -2.576137 | 4.405272  | 0.489457  | 1  | -2.41632000 | -2.83889000 | 3.04649000  |
| 1  | -3.442588 | 4.923687  | 0.898275  | 6  | 1.97184000  | 1.92016000  | 1.73818000  |
| 1  | -1.719789 | 4.519973  | 1.165916  | 1  | 2.04520000  | 2.23416000  | 0.68452500  |
| 1  | -2.322152 | 4.817336  | -0.494155 | 1  | 1.35999000  | 2.61321000  | 2.32625000  |

|    |             |             |             |   |           |           |           |
|----|-------------|-------------|-------------|---|-----------|-----------|-----------|
| 1  | 2.95708000  | 1.76113000  | 2.18366000  | 6 | -0.731761 | 2.019505  | -0.540830 |
| 14 | 4.05172000  | -0.27894800 | -0.45344700 | 6 | -1.968031 | 1.943189  | 0.032231  |
| 6  | 3.28308000  | -0.92680500 | -2.00169000 | 6 | -2.840759 | 0.841435  | -0.225125 |
| 1  | 2.47148000  | -0.23576400 | -2.31296000 | 6 | -2.312769 | -0.279091 | -1.111313 |
| 1  | 4.02251000  | -0.96104700 | -2.81870000 | 6 | -1.045768 | -0.001545 | -1.763419 |
| 1  | 2.84919000  | -1.93076000 | -1.89254000 | 6 | -2.279559 | -1.630490 | -0.235578 |
| 6  | 4.53284000  | 1.49686000  | -0.65846700 | 6 | -1.523333 | -1.456467 | 1.010714  |
| 1  | 5.32898000  | 1.57727000  | -1.41824000 | 6 | 0.773868  | -1.554349 | 0.063425  |
| 1  | 3.65612000  | 2.06352000  | -1.03582000 | 6 | -0.158391 | -1.281626 | 1.072875  |
| 1  | 4.89095000  | 1.97675000  | 0.25976800  | 1 | 0.244665  | -0.913944 | 2.004035  |
| 6  | 5.45630000  | -1.32326000 | 0.15673400  | 8 | -3.973773 | 0.750110  | 0.245860  |
| 1  | 6.25939000  | -1.33829000 | -0.59925500 | 8 | 1.089302  | 1.044490  | -1.756014 |
| 1  | 5.87913000  | -0.93424500 | 1.09529000  | 8 | -2.136239 | -1.268744 | 2.188963  |
| 1  | 5.13913000  | -2.36245000 | 0.33563400  | 8 | 0.483756  | -2.389581 | -0.909975 |
| 1  | -1.04743000 | 0.37022300  | 1.72002000  | 8 | 1.992863  | -1.132813 | 0.079563  |
| 1  | -2.42928000 | -0.77993000 | 1.78624000  | 6 | -3.546930 | -1.504606 | 2.326477  |
| 1  | 0.28065500  | -0.56952300 | -1.41306000 | 1 | -3.781484 | -2.540672 | 2.091635  |
| 8  | -3.18512000 | 3.07838000  | 0.17269500  | 1 | -3.751364 | -1.317510 | 3.371932  |
| 6  | -2.92750000 | 4.50918000  | 0.15618900  | 1 | -4.117134 | -0.823637 | 1.703299  |
| 1  | -3.88443000 | 4.90687000  | 0.51947800  | 6 | 1.450427  | -2.476152 | -1.990108 |
| 1  | -2.10993000 | 4.75362000  | 0.83917000  | 1 | 2.345971  | -2.972875 | -1.630850 |
| 1  | -2.72154000 | 4.84285000  | -0.86486000 | 1 | 0.959714  | -3.065060 | -2.751192 |
| 53 | -2.46098000 | -2.04692000 | -1.31432000 | 1 | 1.674924  | -1.478837 | -2.356407 |

4) *Isoflaviolin* (N2) endo structures.

Int1\_F:

| -----  |                         |          |           |
|--------|-------------------------|----------|-----------|
| Atomic | Coordinates (Angstroms) |          |           |
| Number | X                       | Y        | Z         |
| -----  |                         |          |           |
| 6      | -0.115310               | 0.959094 | -1.403760 |

|    |          |           |          |
|----|----------|-----------|----------|
| 14 | 2.984669 | 0.054793  | 0.839241 |
| 6  | 2.016031 | 1.474611  | 1.514378 |
| 1  | 1.154650 | 1.194834  | 2.118794 |
| 1  | 2.667944 | 2.084012  | 2.141246 |
| 1  | 1.671967 | 2.088547  | 0.686532 |
| 6  | 3.828352 | -0.919577 | 2.181307 |
| 1  | 3.125257 | -1.303509 | 2.918299 |
| 1  | 4.373370 | -1.768923 | 1.773440 |
| 1  | 4.547657 | -0.299823 | 2.713624 |

|   |           |           |           |    |           |           |           |
|---|-----------|-----------|-----------|----|-----------|-----------|-----------|
| 6 | 4.126432  | 0.552073  | -0.521490 | 8  | 1.022804  | 0.740044  | -1.894967 |
| 1 | 4.845129  | 1.298953  | -0.189601 | 8  | -2.054644 | -0.597136 | 2.578629  |
| 1 | 4.686595  | -0.295824 | -0.911546 | 8  | 0.510909  | -2.520286 | -0.114944 |
| 1 | 3.538743  | 0.976553  | -1.333931 | 8  | 2.027702  | -1.014783 | 0.409405  |
| 1 | -3.085667 | -0.500593 | -1.849246 | 6  | -3.451235 | -0.833572 | 2.823667  |
| 1 | -1.826939 | -2.384286 | -0.870958 | 1  | -3.656926 | -1.901060 | 2.831596  |
| 1 | -3.311044 | -1.905124 | -0.047879 | 1  | -3.625206 | -0.426013 | 3.810792  |
| 8 | 0.084495  | 3.067706  | -0.405841 | 1  | -4.064340 | -0.321744 | 2.089165  |
| 6 | -0.346291 | 4.144313  | 0.419501  | 6  | 1.519578  | -3.029586 | -1.020350 |
| 1 | -0.546338 | 3.796056  | 1.431887  | 1  | 2.354753  | -3.415437 | -0.444016 |
| 1 | 0.472912  | 4.851170  | 0.430646  | 1  | 1.024193  | -3.819077 | -1.566652 |
| 1 | -1.239142 | 4.614060  | 0.011774  | 1  | 1.845536  | -2.246815 | -1.695874 |
| 1 | -2.371360 | 2.734949  | 0.644699  | 14 | 3.058307  | 0.313006  | 0.798787  |
| 9 | -0.704986 | -0.931873 | -2.707307 | 6  | 2.131750  | 1.866541  | 1.168574  |

Int1\_Cl:

-----

| Atomic | Coordinates (Angstroms) |   |   |
|--------|-------------------------|---|---|
| Number | X                       | Y | Z |

-----

|   |           |           |           |   |           |           |           |
|---|-----------|-----------|-----------|---|-----------|-----------|-----------|
| 6 | -0.155150 | 0.716207  | -1.476053 | 1 | 1.312668  | 1.755601  | 1.877067  |
| 6 | -0.731558 | 1.939203  | -0.818819 | 1 | 2.823424  | 2.598554  | 1.586671  |
| 6 | -1.943276 | 1.995298  | -0.198968 | 1 | 1.733733  | 2.269760  | 0.241534  |
| 6 | -2.824573 | 0.869665  | -0.185259 | 6 | 3.978563  | -0.320914 | 2.285941  |
| 6 | -2.334602 | -0.418695 | -0.831346 | 1 | 3.316802  | -0.504895 | 3.130513  |
| 6 | -1.096581 | -0.306869 | -1.595423 | 1 | 4.499518  | -1.251075 | 2.066715  |
| 6 | -2.255723 | -1.540456 | 0.322928  | 1 | 4.726525  | 0.399232  | 2.612447  |
| 6 | -1.469545 | -1.068028 | 1.467838  | 6 | 4.115685  | 0.453946  | -0.705694 |
| 6 | 0.811092  | -1.420946 | 0.544954  | 1 | 4.846414  | 1.254498  | -0.605937 |
| 6 | -0.106893 | -0.862788 | 1.442084  | 1 | 4.659775  | -0.467118 | -0.906823 |
| 1 | 0.309620  | -0.241071 | 2.219903  | 1 | 3.482228  | 0.672438  | -1.563993 |
| 8 | -3.939313 | 0.894318  | 0.333797  | 1 | -3.147976 | -0.787194 | -1.457092 |
|   |           |           |           | 1 | -1.804698 | -2.410845 | -0.144132 |
|   |           |           |           | 1 | -3.274851 | -1.781889 | 0.602248  |
|   |           |           |           | 8 | 0.085511  | 2.987543  | -0.949183 |
|   |           |           |           | 6 | -0.320724 | 4.223343  | -0.370622 |
|   |           |           |           | 1 | -0.474564 | 4.113580  | 0.701800  |
|   |           |           |           | 1 | 0.492476  | 4.912683  | -0.555246 |

|    |           |           |           |
|----|-----------|-----------|-----------|
| 1  | -1.233738 | 4.589134  | -0.835910 |
| 1  | -2.325254 | 2.901726  | 0.245962  |
| 17 | -0.768295 | -1.633338 | -2.673314 |

Int1\_Br:

---

| Atomic | Coordinates (Angstroms) |           |           |
|--------|-------------------------|-----------|-----------|
| Number | X                       | Y         | Z         |
| 6      | 0.187707                | -0.022641 | -1.492340 |
| 6      | 0.640664                | -1.454671 | -1.606078 |
| 6      | 1.793470                | -1.955919 | -1.083320 |
| 6      | 2.731700                | -1.110018 | -0.412979 |
| 6      | 2.344335                | 0.348214  | -0.208928 |
| 6      | 1.183503                | 0.799512  | -0.965437 |
| 6      | 2.190463                | 0.575248  | 1.385608  |
| 6      | 1.278439                | -0.410928 | 1.970270  |
| 6      | -0.889828               | 0.643280  | 1.365330  |
| 6      | -0.086050               | -0.427435 | 1.769299  |
| 1      | -0.601136               | -1.350736 | 1.984491  |
| 8      | 3.808406                | -1.511987 | 0.023770  |
| 8      | -0.944701               | 0.289953  | -1.917557 |
| 8      | 1.735847                | -1.516067 | 2.577564  |
| 8      | -0.470503               | 1.883256  | 1.518612  |
| 8      | -2.112422               | 0.522460  | 0.974235  |
| 6      | 3.104967                | -1.591834 | 3.010355  |
| 1      | 3.313648                | -0.797005 | 3.722142  |
| 1      | 3.181180                | -2.551751 | 3.503768  |
| 1      | 3.783389                | -1.556188 | 2.163283  |
| 6      | -1.373785               | 2.932688  | 1.097354  |
| 1      | -2.220604               | 2.972767  | 1.775403  |

|    |           |           |           |
|----|-----------|-----------|-----------|
| 1  | -0.785539 | 3.837383  | 1.149870  |
| 1  | -1.704060 | 2.754333  | 0.080006  |
| 14 | -3.261921 | -0.635139 | 0.407529  |
| 6  | -2.491345 | -2.234290 | -0.096979 |
| 1  | -1.876934 | -2.707291 | 0.666803  |
| 1  | -3.290419 | -2.935932 | -0.341681 |
| 1  | -1.896053 | -2.090749 | -0.995126 |
| 6  | -4.366468 | -0.834556 | 1.890702  |
| 1  | -3.836108 | -1.262166 | 2.740055  |
| 1  | -4.783332 | 0.119016  | 2.209745  |
| 1  | -5.202385 | -1.494625 | 1.666450  |
| 6  | -4.077717 | 0.253051  | -0.986938 |
| 1  | -4.884273 | -0.334309 | -1.421679 |
| 1  | -4.501276 | 1.201956  | -0.662017 |
| 1  | -3.339499 | 0.451966  | -1.761337 |
| 1  | 3.225888  | 0.945608  | -0.440243 |
| 1  | 1.822060  | 1.589584  | 1.501870  |
| 1  | 3.185483  | 0.510270  | 1.811033  |
| 8  | -0.220905 | -2.173308 | -2.331067 |
| 6  | 0.076280  | -3.548434 | -2.549969 |
| 1  | 0.141976  | -4.084721 | -1.604596 |
| 1  | -0.748041 | -3.932444 | -3.135670 |
| 1  | 1.009236  | -3.660677 | -3.098899 |
| 1  | 2.090136  | -2.985277 | -1.216002 |
| 35 | 1.021136  | 2.700883  | -1.179521 |

Int1\_I:

---

| Atomic | Coordinates (Angstroms) |   |   |
|--------|-------------------------|---|---|
| Number | X                       | Y | Z |

---

|    |           |           |           |    |           |           |           |
|----|-----------|-----------|-----------|----|-----------|-----------|-----------|
| 6  | -0.158086 | 0.098427  | -1.430186 | 1  | 5.616445  | 0.833409  | 1.219801  |
| 6  | -0.360279 | 1.557536  | -1.742434 | 6  | 3.905178  | -1.014979 | -1.053184 |
| 6  | -1.385389 | 2.320321  | -1.276965 | 1  | 4.769619  | -0.696937 | -1.633171 |
| 6  | -2.413055 | 1.758641  | -0.459302 | 1  | 4.146192  | -1.970779 | -0.590092 |
| 6  | -2.257596 | 0.307121  | -0.028023 | 1  | 3.058749  | -1.151961 | -1.723585 |
| 6  | -1.232886 | -0.455884 | -0.737109 | 1  | -3.240684 | -0.154709 | -0.118020 |
| 6  | -2.047983 | 0.329828  | 1.573842  | 1  | -1.856819 | -0.699461 | 1.858236  |
| 6  | -0.938419 | 1.219711  | 1.931226  | 1  | -2.985165 | 0.653461  | 2.011309  |
| 6  | 0.955930  | -0.323611 | 1.500567  | 8  | 0.575153  | 2.005818  | -2.584718 |
| 6  | 0.386381  | 0.942459  | 1.673940  | 6  | 0.520231  | 3.373564  | -2.967441 |
| 1  | 1.073678  | 1.773812  | 1.658537  | 1  | 0.607013  | 4.024093  | -2.097085 |
| 8  | -3.386762 | 2.401866  | -0.068711 | 1  | 1.365282  | 3.525565  | -3.628690 |
| 8  | 0.871771  | -0.467393 | -1.861480 | 1  | -0.407431 | 3.597508  | -3.493614 |
| 8  | -1.151964 | 2.479177  | 2.338686  | 1  | -1.506280 | 3.355571  | -1.558080 |
| 8  | 0.337221  | -1.390323 | 1.970295  | 53 | -1.405470 | -2.555073 | -0.659550 |
| 8  | 2.138324  | -0.535335 | 1.042271  |    |           |           |           |
| 6  | -2.452369 | 2.871509  | 2.802228  |    |           |           |           |
| 1  | -2.747947 | 2.258223  | 3.652056  |    |           |           |           |
| 1  | -2.331580 | 3.899758  | 3.123502  |    |           |           |           |
| 1  | -3.186113 | 2.816418  | 2.002930  |    |           |           |           |
| 6  | 1.037028  | -2.646188 | 1.868060  |    |           |           |           |
| 1  | 1.917598  | -2.625503 | 2.505506  |    |           |           |           |
| 1  | 0.329762  | -3.387860 | 2.215649  | 6  | 1.630519  | -1.473444 | 0.702253  |
| 1  | 1.316814  | -2.847131 | 0.839821  | 6  | 2.224779  | -1.059546 | -0.603268 |
| 14 | 3.438029  | 0.238287  | 0.216800  | 6  | 1.486634  | -0.969325 | -1.730638 |
| 6  | 2.983127  | 1.882383  | -0.488846 | 6  | 0.050804  | -1.159819 | -1.695855 |
| 1  | 2.571907  | 2.579917  | 0.237905  | 6  | -0.516238 | -1.873685 | -0.469508 |
| 1  | 3.889760  | 2.336008  | -0.892287 | 6  | 0.114327  | -1.354454 | 0.824313  |
| 1  | 2.281367  | 1.753360  | -1.307667 | 6  | -2.030768 | -1.853694 | -0.442975 |
| 6  | 4.685611  | 0.405950  | 1.588832  | 6  | -2.576085 | -0.614239 | 0.167638  |
| 1  | 4.319361  | 1.057930  | 2.381419  | 6  | -0.390456 | 0.088429  | 1.142915  |
| 1  | 4.921481  | -0.559045 | 2.034571  | 6  | -1.848913 | 0.224173  | 0.904916  |

Int2\_F:

| -----  |                         |           |           |
|--------|-------------------------|-----------|-----------|
| Atomic | Coordinates (Angstroms) |           |           |
| Number | X                       | Y         | Z         |
| -----  |                         |           |           |
| 6      | 1.630519                | -1.473444 | 0.702253  |
| 6      | 2.224779                | -1.059546 | -0.603268 |
| 6      | 1.486634                | -0.969325 | -1.730638 |
| 6      | 0.050804                | -1.159819 | -1.695855 |
| 6      | -0.516238               | -1.873685 | -0.469508 |
| 6      | 0.114327                | -1.354454 | 0.824313  |
| 6      | -2.030768               | -1.853694 | -0.442975 |
| 6      | -2.576085               | -0.614239 | 0.167638  |
| 6      | -0.390456               | 0.088429  | 1.142915  |
| 6      | -1.848913               | 0.224173  | 0.904916  |

|    |           |           |           |
|----|-----------|-----------|-----------|
| 1  | -2.327291 | 1.068841  | 1.378337  |
| 8  | -0.671702 | -0.821659 | -2.618944 |
| 8  | 2.318265  | -1.934847 | 1.577541  |
| 8  | -3.910120 | -0.353836 | 0.057052  |
| 8  | -0.212863 | 0.461893  | 2.481608  |
| 8  | 0.384476  | 0.903900  | 0.278757  |
| 6  | -4.610839 | -0.921889 | -1.043138 |
| 1  | -4.672693 | -2.005786 | -0.967068 |
| 1  | -5.609102 | -0.505765 | -0.997854 |
| 1  | -4.148916 | -0.648376 | -1.991844 |
| 6  | 1.120741  | 0.549008  | 2.975183  |
| 1  | 1.812185  | 0.887122  | 2.202568  |
| 1  | 1.097307  | 1.285334  | 3.771570  |
| 1  | 1.452485  | -0.407697 | 3.370167  |
| 14 | 0.035459  | 2.453515  | -0.277409 |
| 6  | -1.463380 | 2.478724  | -1.383160 |
| 1  | -2.399974 | 2.420461  | -0.831930 |
| 1  | -1.486046 | 3.395210  | -1.973678 |
| 1  | -1.439864 | 1.640633  | -2.080156 |
| 6  | -0.166416 | 3.609580  | 1.168659  |
| 1  | -0.992684 | 3.302749  | 1.808358  |
| 1  | 0.727810  | 3.637331  | 1.789067  |
| 1  | -0.367642 | 4.628383  | 0.839994  |
| 6  | 1.572475  | 2.813584  | -1.267165 |
| 1  | 1.624491  | 3.850206  | -1.596029 |
| 1  | 2.470125  | 2.603707  | -0.685276 |
| 1  | 1.598366  | 2.186814  | -2.159090 |
| 1  | -0.187632 | -2.911631 | -0.564031 |
| 1  | -2.411356 | -2.710297 | 0.115544  |
| 1  | -2.367934 | -1.963060 | -1.471500 |
| 8  | 3.532517  | -0.836067 | -0.488820 |
| 6  | 4.238641  | -0.485678 | -1.677258 |

|   |           |           |           |
|---|-----------|-----------|-----------|
| 1 | 3.844352  | 0.435282  | -2.102101 |
| 1 | 5.265714  | -0.341139 | -1.371788 |
| 1 | 4.177646  | -1.288060 | -2.409497 |
| 1 | 1.908247  | -0.665590 | -2.677092 |
| 9 | -0.289284 | -2.176144 | 1.861337  |

Int2\_Cl:

| -----  |                         |           |           |
|--------|-------------------------|-----------|-----------|
| Atomic | Coordinates (Angstroms) |           |           |
| Number | X                       | Y         | Z         |
| -----  |                         |           |           |
| 6      | 1.423372                | -1.615708 | 0.258747  |
| 6      | 2.046014                | -1.022406 | -0.967243 |
| 6      | 1.325422                | -0.582009 | -2.019182 |
| 6      | -0.119994               | -0.629971 | -2.007004 |
| 6      | -0.770676               | -1.523443 | -0.952042 |
| 6      | -0.092110               | -1.403368 | 0.421384  |
| 6      | -2.266452               | -1.307461 | -0.905592 |
| 6      | -2.613399               | -0.092068 | -0.128888 |
| 6      | -0.418788               | -0.006740 | 1.082595  |
| 6      | -1.788597               | 0.466464  | 0.756157  |
| 1      | -2.141509               | 1.293700  | 1.352396  |
| 8      | -0.795429               | -0.054131 | -2.843775 |
| 8      | 2.100906                | -2.237866 | 1.034057  |
| 8      | -3.862553               | 0.439162  | -0.237847 |
| 8      | -0.373633               | -0.001386 | 2.481233  |
| 8      | 0.598569                | 0.833998  | 0.560380  |
| 6      | -4.581843               | 0.212883  | -1.444615 |
| 1      | -4.874649               | -0.830738 | -1.548880 |
| 1      | -5.473450               | 0.822582  | -1.369733 |
| 1      | -4.005876               | 0.523718  | -2.315937 |

| Atomic | Coordinates (Angstroms) |           |           | Number | X         | Y         | Z         |
|--------|-------------------------|-----------|-----------|--------|-----------|-----------|-----------|
| 6      | 0.879315                | -0.273579 | 3.102346  |        |           |           |           |
| 1      | 1.687436                | 0.289147  | 2.635632  |        |           |           |           |
| 1      | 0.769399                | 0.044859  | 4.132891  | 6      | 1.124109  | -1.709324 | -0.114747 |
| 1      | 1.110615                | -1.335083 | 3.076721  | 6      | 2.007924  | -1.095775 | -1.155650 |
| 14     | 0.582767                | 2.496680  | 0.310505  | 6      | 1.555300  | -0.245749 | -2.099222 |
| 6      | -0.159459               | 2.877300  | -1.352643 | 6      | 0.158891  | 0.128008  | -2.151001 |
| 1      | -1.206518               | 2.581438  | -1.406222 | 6      | -0.815074 | -0.786490 | -1.405232 |
| 1      | -0.107448               | 3.944308  | -1.569383 | 6      | -0.299564 | -1.141589 | -0.004896 |
| 1      | 0.355397                | 2.354674  | -2.157753 | 6      | -2.215210 | -0.216952 | -1.418943 |
| 6      | -0.315023               | 3.395907  | 1.672640  | 6      | -2.395486 | 0.821509  | -0.374606 |
| 1      | -1.394162               | 3.385958  | 1.532240  | 6      | -0.375638 | 0.120888  | 0.932956  |
| 1      | -0.107720               | 2.953301  | 2.646523  | 6      | -1.590839 | 0.939581  | 0.679741  |
| 1      | -0.011163               | 4.441407  | 1.711399  | 1      | -1.823725 | 1.668450  | 1.441707  |
| 6      | 2.402881                | 2.886642  | 0.333223  | 8      | -0.240787 | 1.064843  | -2.821422 |
| 1      | 2.613307                | 3.911932  | 0.033984  | 8      | 1.547254  | -2.614729 | 0.557803  |
| 1      | 2.829348                | 2.737194  | 1.323887  | 8      | -3.488078 | 1.634887  | -0.428925 |
| 1      | 2.940187                | 2.227299  | -0.347614 | 8      | -0.424279 | -0.158682 | 2.304658  |
| 1      | -0.579890               | -2.542449 | -1.298477 | 8      | 0.820886  | 0.815037  | 0.611731  |
| 1      | -2.759947               | -2.171376 | -0.456750 | 6      | -4.027856 | 1.925475  | -1.714572 |
| 1      | -2.614573               | -1.227532 | -1.931665 | 1      | -4.507174 | 1.054653  | -2.158021 |
| 8      | 3.373503                | -1.006108 | -0.863464 | 1      | -4.772210 | 2.694245  | -1.551131 |
| 6      | 4.102501                | -0.510070 | -1.983020 | 1      | -3.258747 | 2.303683  | -2.388073 |
| 1      | 3.849853                | 0.531165  | -2.176540 | 6      | 0.697836  | -0.816604 | 2.885827  |
| 1      | 5.146458                | -0.589474 | -1.712731 | 1      | 1.636304  | -0.393029 | 2.527648  |
| 1      | 3.897824                | -1.107795 | -2.868652 | 1      | 0.614641  | -0.648140 | 3.954068  |
| 1      | 1.781634                | -0.132560 | -2.888040 | 1      | 0.675878  | -1.884372 | 2.681094  |
| 17     | -0.736069               | -2.710752 | 1.471163  | 14     | 1.172698  | 2.440153  | 0.883976  |
|        |                         |           |           | 6      | 0.348532  | 3.518858  | -0.388332 |
|        |                         |           |           | 1      | -0.731775 | 3.558106  | -0.256110 |
|        |                         |           |           | 1      | 0.722337  | 4.541274  | -0.328822 |
|        |                         |           |           | 1      | 0.534699  | 3.155983  | -1.398420 |
|        |                         |           |           | 6      | 0.690340  | 2.944784  | 2.610479  |

Int2\_Br:

Atomic

Coordinates (Angstroms)



|    |           |           |           |    |           |           |           |
|----|-----------|-----------|-----------|----|-----------|-----------|-----------|
| 1  | -0.385538 | 2.899260  | 2.768894  | 6  | -0.020201 | 0.356462  | 0.873566  |
| 1  | 1.151541  | 2.307230  | 3.362741  | 6  | -0.367360 | 1.807905  | 0.694897  |
| 1  | 1.002675  | 3.969212  | 2.811591  | 1  | -0.177505 | 2.442301  | 1.556610  |
| 6  | 3.021580  | 2.448300  | 0.665375  | 8  | 1.252270  | 1.051328  | -2.673011 |
| 1  | 3.462279  | 3.417696  | 0.892251  | 8  | -0.559541 | -2.916309 | 0.336970  |
| 1  | 3.493878  | 1.713018  | 1.316262  | 8  | -1.189969 | 3.665678  | -0.408182 |
| 1  | 3.291618  | 2.200484  | -0.360553 | 8  | -0.330674 | 0.091098  | 2.209830  |
| 1  | -0.815453 | -1.714129 | -1.983548 | 8  | 1.339462  | 0.097596  | 0.619248  |
| 1  | -2.945597 | -1.011873 | -1.254639 | 6  | -1.081889 | 4.371471  | -1.634529 |
| 1  | -2.393215 | 0.190962  | -2.410266 | 1  | -1.866705 | 4.077377  | -2.340273 |
| 8  | 3.266606  | -1.509302 | -1.011177 | 1  | -1.208263 | 5.424620  | -1.382115 |
| 6  | 4.205250  | -1.067070 | -1.987713 | 1  | -0.096760 | 4.219465  | -2.091349 |
| 1  | 4.337606  | 0.011511  | -1.932599 | 6  | 0.016179  | -1.173001 | 2.757356  |
| 1  | 5.135785  | -1.564761 | -1.752431 | 1  | 0.964486  | -1.539718 | 2.349631  |
| 1  | 3.876216  | -1.344350 | -2.987027 | 1  | 0.124513  | -1.012566 | 3.832035  |
| 1  | 2.207276  | 0.227231  | -2.817199 | 1  | -0.773143 | -1.906933 | 2.571282  |
| 35 | -1.466298 | -2.570801 | 0.742537  | 14 | 2.687288  | 1.018912  | 1.067793  |

Int2\_I:

---

| Atomic | Coordinates (Angstroms) |           |           |
|--------|-------------------------|-----------|-----------|
| Number | X                       | Y         | Z         |
| 6      | -0.139133               | -1.959540 | -0.261909 |
| 6      | 1.069063                | -2.135700 | -1.159127 |
| 6      | 1.467641                | -1.193112 | -2.036470 |
| 6      | 0.758817                | 0.087209  | -2.117265 |
| 6      | -0.679159               | 0.119782  | -1.572863 |
| 6      | -0.760761               | -0.551215 | -0.183708 |
| 6      | -1.254029               | 1.529944  | -1.623006 |
| 6      | -0.878972               | 2.338339  | -0.416529 |

---

|   |           |           |           |
|---|-----------|-----------|-----------|
| 6 | 2.745937  | 2.659995  | 0.165182  |
| 1 | 2.046902  | 3.390876  | 0.583025  |
| 1 | 3.757544  | 3.080433  | 0.227170  |
| 1 | 2.497755  | 2.520959  | -0.893465 |
| 6 | 2.684030  | 1.258621  | 2.926806  |
| 1 | 1.779913  | 1.783378  | 3.254310  |
| 1 | 2.716530  | 0.296033  | 3.449510  |
| 1 | 3.553064  | 1.846526  | 3.244758  |
| 6 | 4.090106  | -0.086661 | 0.501358  |
| 1 | 5.065940  | 0.302460  | 0.812343  |
| 1 | 3.976683  | -1.095912 | 0.913814  |
| 1 | 4.089487  | -0.160838 | -0.592642 |
| 1 | -1.249894 | -0.510096 | -2.270126 |
| 1 | -2.349157 | 1.491129  | -1.687133 |
| 1 | -0.883570 | 2.001201  | -2.537165 |

|    |           |           |           |    |           |           |           |
|----|-----------|-----------|-----------|----|-----------|-----------|-----------|
| 8  | 1.650340  | -3.315813 | -0.949741 | 1  | -3.275604 | 2.261789  | 2.663726  |
| 6  | 2.798932  | -3.619701 | -1.723940 | 1  | -3.718695 | 0.715870  | 1.900544  |
| 1  | 3.595239  | -2.891583 | -1.531252 | 6  | 1.685114  | -3.148022 | 0.572122  |
| 1  | 3.116670  | -4.612285 | -1.408838 | 1  | 2.579792  | -3.063607 | 1.182765  |
| 1  | 2.551653  | -3.625593 | -2.791434 | 1  | 1.226193  | -4.115515 | 0.721081  |
| 1  | 2.355002  | -1.290773 | -2.652158 | 1  | 1.936857  | -3.003303 | -0.472033 |
| 53 | -2.852806 | -0.768842 | 0.381406  | 14 | 3.174166  | 0.686687  | 0.169582  |

$\pi_{\text{complex\_F}}$ :

-----

| Atomic | Coordinates (Angstroms) |   |   |
|--------|-------------------------|---|---|
| Number | X                       | Y | Z |

-----

|   |           |           |           |
|---|-----------|-----------|-----------|
| 6 | -0.459302 | -0.107388 | -1.728392 |
| 6 | -1.359924 | 1.006232  | -1.326423 |
| 6 | -2.623953 | 0.787345  | -0.909865 |
| 6 | -3.157945 | -0.558833 | -0.772663 |
| 6 | -2.251880 | -1.678891 | -1.061684 |
| 6 | -1.022273 | -1.444091 | -1.525334 |
| 6 | -1.853034 | -1.234239 | 2.068119  |
| 6 | -1.180785 | -0.088764 | 1.837099  |
| 6 | 0.987592  | -0.902649 | 0.844762  |
| 6 | 0.118468  | 0.065446  | 1.248268  |
| 1 | 0.429766  | 1.084271  | 1.081907  |
| 8 | -4.321664 | -0.761115 | -0.436714 |
| 8 | 0.649446  | 0.076126  | -2.203416 |
| 8 | -1.698471 | 1.161465  | 2.085768  |
| 8 | 0.695522  | -2.199231 | 0.996298  |
| 8 | 2.137684  | -0.671035 | 0.244856  |
| 6 | -3.025841 | 1.210126  | 2.582865  |
| 1 | -3.093853 | 0.744161  | 3.566042  |

|   |           |           |           |
|---|-----------|-----------|-----------|
| 1 | 3.066022  | 2.993493  | -0.581563 |
| 1 | 1.635474  | 2.125149  | -1.123422 |
| 6 | 3.934550  | 0.787731  | 1.863941  |
| 1 | 3.163840  | 0.927288  | 2.621242  |
| 1 | 4.480339  | -0.120077 | 2.114039  |
| 1 | 4.627132  | 1.622740  | 1.952822  |
| 6 | 4.351803  | 0.162994  | -1.158012 |
| 1 | 5.122885  | 0.910205  | -1.333560 |
| 1 | 4.846732  | -0.773393 | -0.908501 |
| 1 | 3.816757  | 0.013779  | -2.094481 |
| 1 | -2.629299 | -2.679488 | -0.923467 |
| 1 | -1.384597 | -2.178571 | 1.864052  |
| 1 | -2.849434 | -1.247172 | 2.474449  |
| 8 | -0.750218 | 2.192981  | -1.435093 |
| 6 | -1.458052 | 3.321960  | -0.933264 |
| 1 | -1.762793 | 3.148531  | 0.098530  |
| 1 | -0.762242 | 4.149792  | -0.982073 |
| 1 | -2.330549 | 3.536247  | -1.547959 |
| 1 | -3.293742 | 1.589921  | -0.643323 |
| 9 | -0.188131 | -2.446830 | -1.830972 |

$\pi_{\text{complex\_Cl}}$ :



|    |           |           |           |    |           |           |           |
|----|-----------|-----------|-----------|----|-----------|-----------|-----------|
| 6  | 1.890935  | -0.042785 | 2.462120  | 1  | 1.322828  | 0.842988  | 2.677983  |
| 6  | 1.332910  | -1.029833 | 1.732811  | 1  | 2.887225  | -0.110327 | 2.863294  |
| 6  | -0.972069 | -0.135517 | 1.275076  | 8  | 1.015450  | -1.733198 | -2.132361 |
| 6  | 0.046635  | -1.021187 | 1.097407  | 6  | 1.832582  | -2.900651 | -2.100156 |
| 1  | -0.116666 | -1.796329 | 0.365872  | 1  | 2.116879  | -3.129865 | -1.073227 |
| 8  | 4.307535  | 0.898730  | 0.032416  | 1  | 1.220179  | -3.694646 | -2.507161 |
| 8  | -0.605757 | 0.326712  | -1.988749 | 1  | 2.721609  | -2.773504 | -2.714990 |
| 8  | 1.983367  | -2.196408 | 1.404999  | 1  | 3.512634  | -1.255227 | -1.155442 |
| 8  | -0.877673 | 0.852418  | 2.172583  | 35 | -0.400066 | 3.014168  | -0.550615 |
| 8  | -2.085011 | -0.129323 | 0.570889  |    |           |           |           |
| 6  | 3.337670  | -2.301921 | 1.816537  |    |           |           |           |
| 1  | 3.417316  | -2.320146 | 2.903255  |    |           |           |           |
| 1  | 3.699861  | -3.241164 | 1.414424  |    |           |           |           |
| 1  | 3.931700  | -1.475706 | 1.424736  |    |           |           |           |
| 6  | -2.063115 | 1.620154  | 2.423989  |    |           |           |           |
| 1  | -2.859054 | 0.980470  | 2.795835  |    |           |           |           |
| 1  | -1.776188 | 2.336350  | 3.182019  | 6  | 0.475140  | 0.390162  | -1.393903 |
| 1  | -2.390823 | 2.130794  | 1.524249  | 6  | 1.723142  | -0.408718 | -1.552266 |
| 14 | -3.038941 | -1.330182 | -0.181702 | 6  | 2.910975  | 0.002133  | -1.067932 |
| 6  | -2.055503 | -2.575445 | -1.140595 | 6  | 3.024309  | 1.221585  | -0.293397 |
| 1  | -1.480892 | -3.246431 | -0.503588 | 6  | 1.781390  | 1.967098  | -0.025389 |
| 1  | -2.744799 | -3.196415 | -1.714205 | 6  | 0.613719  | 1.597191  | -0.566876 |
| 1  | -1.377487 | -2.094960 | -1.844474 | 6  | 2.001166  | 0.011385  | 2.458282  |
| 6  | -3.940980 | -2.142998 | 1.228459  | 6  | 1.677888  | -1.035106 | 1.674512  |
| 1  | -3.234062 | -2.521692 | 1.966028  | 6  | -0.780212 | -0.688059 | 1.288061  |
| 1  | -4.607673 | -1.450731 | 1.739820  | 6  | 0.418164  | -1.280093 | 1.036343  |
| 1  | -4.540783 | -2.988661 | 0.896650  | 1  | 0.429644  | -2.003226 | 0.237867  |
| 6  | -4.115411 | -0.300138 | -1.277286 | 8  | 4.104282  | 1.641874  | 0.116034  |
| 1  | -4.857364 | -0.897680 | -1.802379 | 8  | -0.563545 | 0.052233  | -1.938171 |
| 1  | -4.641635 | 0.466430  | -0.712471 | 8  | 2.571918  | -2.006577 | 1.293838  |
| 1  | -3.498760 | 0.201696  | -2.021203 | 8  | -0.913128 | 0.205003  | 2.276683  |
| 1  | 2.433203  | 2.629632  | 0.386004  | 8  | -1.869548 | -0.887168 | 0.579537  |

$\pi$ \_complex\_l:

| ----- |        |                         |           |           |  |  |  |
|-------|--------|-------------------------|-----------|-----------|--|--|--|
|       | Atomic | Coordinates (Angstroms) |           |           |  |  |  |
|       | Number | X                       | Y         | Z         |  |  |  |
| ----- |        |                         |           |           |  |  |  |
|       | 6      | 0.475140                | 0.390162  | -1.393903 |  |  |  |
|       | 6      | 1.723142                | -0.408718 | -1.552266 |  |  |  |
|       | 6      | 2.910975                | 0.002133  | -1.067932 |  |  |  |
|       | 6      | 3.024309                | 1.221585  | -0.293397 |  |  |  |
|       | 6      | 1.781390                | 1.967098  | -0.025389 |  |  |  |
|       | 6      | 0.613719                | 1.597191  | -0.566876 |  |  |  |
|       | 6      | 2.001166                | 0.011385  | 2.458282  |  |  |  |
|       | 6      | 1.677888                | -1.035106 | 1.674512  |  |  |  |
|       | 6      | -0.780212               | -0.688059 | 1.288061  |  |  |  |
|       | 6      | 0.418164                | -1.280093 | 1.036343  |  |  |  |
|       | 1      | 0.429644                | -2.003226 | 0.237867  |  |  |  |
|       | 8      | 4.104282                | 1.641874  | 0.116034  |  |  |  |
|       | 8      | -0.563545               | 0.052233  | -1.938171 |  |  |  |
|       | 8      | 2.571918                | -2.006577 | 1.293838  |  |  |  |
|       | 8      | -0.913128               | 0.205003  | 2.276683  |  |  |  |
|       | 8      | -1.869548               | -0.887168 | 0.579537  |  |  |  |

|       |           |           |           | TS1_F: |                         |           |           |
|-------|-----------|-----------|-----------|--------|-------------------------|-----------|-----------|
| ----- |           |           |           | -----  |                         |           |           |
|       |           |           |           | Atomic | Coordinates (Angstroms) |           |           |
|       |           |           |           | Number | X                       | Y         | Z         |
| ----- |           |           |           | -----  |                         |           |           |
| 6     | 3.922173  | -1.796648 | 1.668288  |        |                         |           |           |
| 1     | 4.046031  | -1.841448 | 2.751302  |        |                         |           |           |
| 1     | 4.491595  | -2.598344 | 1.209046  |        |                         |           |           |
| 1     | 4.283583  | -0.831933 | 1.309273  |        |                         |           |           |
| 6     | -2.245719 | 0.598853  | 2.618871  |        |                         |           |           |
| 1     | -2.831404 | -0.261600 | 2.936451  |        |                         |           |           |
| 1     | -2.133220 | 1.294347  | 3.441635  | 6      | -0.347992               | 0.722417  | -1.560703 |
| 1     | -2.735734 | 1.086066  | 1.780978  | 6      | -1.058771               | 1.784486  | -0.766312 |
| 14    | -2.514185 | -2.227985 | -0.246547 | 6      | -2.293895               | 1.623921  | -0.227904 |
| 6     | -1.264048 | -3.178013 | -1.234635 | 6      | -3.055799               | 0.424012  | -0.463603 |
| 1     | -0.564175 | -3.728201 | -0.607482 | 6      | -2.353402               | -0.697765 | -1.156978 |
| 1     | -1.790152 | -3.908633 | -1.850055 | 6      | -1.155998               | -0.406665 | -1.808458 |
| 1     | -0.704564 | -2.518334 | -1.895051 | 6      | -2.080480               | -1.917038 | 0.385155  |
| 6     | -3.228815 | -3.278286 | 1.115833  | 6      | -1.316985               | -1.235644 | 1.350256  |
| 1     | -2.454891 | -3.521022 | 1.844519  | 6      | 0.937287                | -1.397421 | 0.287033  |
| 1     | -4.027015 | -2.754539 | 1.639701  | 6      | 0.039210                | -0.908747 | 1.216725  |
| 1     | -3.633815 | -4.218151 | 0.745071  | 1      | 0.421694                | -0.184571 | 1.918089  |
| 6     | -3.782432 | -1.416400 | -1.323419 | 8      | -4.218617               | 0.293028  | -0.090933 |
| 1     | -4.367256 | -2.143541 | -1.883498 | 8      | 0.815102                | 0.897219  | -1.960660 |
| 1     | -4.468895 | -0.813622 | -0.731451 | 8      | -1.870528               | -0.629397 | 2.426959  |
| 1     | -3.284944 | -0.757866 | -2.033435 | 8      | 0.638919                | -2.437844 | -0.474224 |
| 1     | 1.887052  | 2.846659  | 0.591713  | 8      | 2.140409                | -0.932888 | 0.116266  |
| 1     | 1.248198  | 0.732746  | 2.714694  | 6      | -3.226687               | -0.929744 | 2.766750  |
| 1     | 2.990020  | 0.153004  | 2.857856  | 1      | -3.357611               | -2.001524 | 2.910682  |
| 8     | 1.491787  | -1.547859 | -2.217615 | 1      | -3.406461               | -0.412577 | 3.700437  |
| 6     | 2.560169  | -2.486129 | -2.257529 | 1      | -3.914359               | -0.567668 | 2.008229  |
| 1     | 2.908913  | -2.703632 | -1.247481 | 6      | 1.566638                | -2.756105 | -1.535158 |
| 1     | 2.149065  | -3.379075 | -2.713618 | 1      | 2.478810                | -3.170477 | -1.117315 |
| 1     | 3.386866  | -2.116632 | -2.864067 | 1      | 1.053041                | -3.491166 | -2.138043 |
| 1     | 3.817901  | -0.565515 | -1.205645 | 1      | 1.779470                | -1.868178 | -2.120542 |
| 53    | -1.148309 | 2.731293  | -0.326947 | 14     | 3.125032                | 0.353570  | 0.680142  |
|       |           |           |           | 6      | 2.170398                | 1.906077  | 0.979938  |

|   |           |           |           |    |           |           |           |
|---|-----------|-----------|-----------|----|-----------|-----------|-----------|
| 1 | 1.401446  | 1.823682  | 1.745455  | 6  | -2.307529 | -1.062616 | -0.771911 |
| 1 | 2.859167  | 2.689401  | 1.297978  | 6  | -1.095154 | -0.944073 | -1.460456 |
| 1 | 1.702699  | 2.225400  | 0.051217  | 6  | -2.023166 | -1.550906 | 1.149074  |
| 6 | 3.903973  | -0.313384 | 2.230722  | 6  | -1.309173 | -0.496140 | 1.745772  |
| 1 | 3.156241  | -0.542158 | 2.988524  | 6  | 0.985715  | -1.027715 | 0.926942  |
| 1 | 4.468998  | -1.223225 | 2.040011  | 6  | 0.031866  | -0.189696 | 1.475845  |
| 1 | 4.589107  | 0.410846  | 2.668691  | 1  | 0.355675  | 0.809940  | 1.720286  |
| 6 | 4.302004  | 0.539967  | -0.731940 | 8  | -4.308369 | 0.088826  | -0.256498 |
| 1 | 5.052797  | 1.304452  | -0.544468 | 8  | 0.776929  | 0.412359  | -2.013703 |
| 1 | 4.825173  | -0.389483 | -0.946507 | 8  | -1.907358 | 0.476497  | 2.473297  |
| 1 | 3.745558  | 0.826405  | -1.623303 | 8  | 0.754756  | -2.327767 | 0.811248  |
| 1 | -3.021061 | -1.392789 | -1.649241 | 8  | 2.171785  | -0.654853 | 0.556626  |
| 1 | -1.565883 | -2.680807 | -0.172455 | 6  | -3.270967 | 0.300946  | 2.866814  |
| 1 | -3.103467 | -2.158499 | 0.631594  | 1  | -3.389686 | -0.616431 | 3.441159  |
| 8 | -0.326597 | 2.896854  | -0.677703 | 1  | -3.499299 | 1.153974  | 3.492966  |
| 6 | -0.846217 | 3.963091  | 0.107397  | 1  | -3.934348 | 0.290175  | 2.006820  |
| 1 | -0.983049 | 3.643891  | 1.139542  | 6  | 1.814841  | -3.138835 | 0.268577  |
| 1 | -0.107957 | 4.753178  | 0.056762  | 1  | 2.648316  | -3.168518 | 0.964784  |
| 1 | -1.793449 | 4.316708  | -0.294367 | 1  | 1.380764  | -4.121768 | 0.154268  |
| 1 | -2.793288 | 2.403316  | 0.326952  | 1  | 2.136747  | -2.749728 | -0.690449 |
| 9 | -0.640807 | -1.374295 | -2.617232 | 14 | 3.166630  | 0.738295  | 0.403420  |

TS1\_Cl:

| -----  |                         |          |           |   |          |           |           |
|--------|-------------------------|----------|-----------|---|----------|-----------|-----------|
| Atomic | Coordinates (Angstroms) |          |           |   |          |           |           |
| Number | X                       | Y        | Z         |   |          |           |           |
| -----  |                         |          |           |   |          |           |           |
| 6      | -0.372553               | 0.271259 | -1.578297 | 6 | 4.282357 | 0.591866  | 1.883976  |
| 6      | -1.160623               | 1.479607 | -1.143617 | 1 | 3.714948 | 0.612422  | 2.813426  |
| 6      | -2.426688               | 1.427484 | -0.667961 | 1 | 4.855472 | -0.332815 | 1.867251  |
| 6      | -3.120767               | 0.169502 | -0.556427 | 1 | 4.993268 | 1.415548  | 1.926567  |
|        |                         |          |           | 6 | 4.031507 | 0.431983  | -1.198122 |
|        |                         |          |           | 1 | 4.765907 | 1.204343  | -1.417174 |
|        |                         |          |           | 1 | 4.551060 | -0.524196 | -1.188859 |

|    |           |           |           |    |           |           |          |
|----|-----------|-----------|-----------|----|-----------|-----------|----------|
| 1  | 3.301761  | 0.413044  | -2.005242 | 8  | -0.770237 | 1.561265  | 1.779914 |
| 1  | -2.908079 | -1.939187 | -0.970331 | 8  | -2.201462 | 0.169987  | 0.835944 |
| 1  | -1.461244 | -2.444066 | 0.933756  | 6  | 3.181264  | -1.737294 | 2.642828 |
| 1  | -3.037016 | -1.731232 | 1.475600  | 1  | 3.300231  | -1.120239 | 3.531898 |
| 8  | -0.457699 | 2.602072  | -1.320943 | 1  | 3.384856  | -2.771852 | 2.888676 |
| 6  | -1.044479 | 3.821156  | -0.879297 | 1  | 3.862924  | -1.404411 | 1.865403 |
| 1  | -1.255846 | 3.779306  | 0.189327  | 6  | -1.823265 | 2.535749  | 1.647514 |
| 1  | -0.308735 | 4.587649  | -1.084231 | 1  | -2.648463 | 2.273824  | 2.304377 |
| 1  | -1.959703 | 4.033399  | -1.427391 | 1  | -1.374755 | 3.469941  | 1.954009 |
| 1  | -2.989919 | 2.311841  | -0.411644 | 1  | -2.160007 | 2.596361  | 0.619021 |
| 17 | -0.358007 | -2.386330 | -2.093633 | 14 | -3.217111 | -1.024219 | 0.129133 |

TS1\_Br:

| -----  |                         |           |           |   |           |           |           |
|--------|-------------------------|-----------|-----------|---|-----------|-----------|-----------|
| Atomic | Coordinates (Angstroms) |           |           |   |           |           |           |
| Number | X                       | Y         | Z         |   |           |           |           |
| -----  |                         |           |           |   |           |           |           |
| 6      | 0.382749                | 0.061666  | -1.474596 | 6 | -4.366346 | -1.439154 | 1.531255  |
| 6      | 1.149482                | -1.236763 | -1.509703 | 1 | -3.822848 | -1.840203 | 2.385611  |
| 6      | 2.408336                | -1.385634 | -1.036179 | 1 | -4.918041 | -0.565312 | 1.871792  |
| 6      | 3.110849                | -0.274240 | -0.446446 | 1 | -5.096421 | -2.190837 | 1.235859  |
| 6      | 2.308036                | 0.958075  | -0.183576 | 6 | -4.034194 | -0.085480 | -1.233961 |
| 6      | 1.112502                | 1.127208  | -0.890223 | 1 | -4.775700 | -0.687034 | -1.755384 |
| 6      | 1.993896                | 0.664879  | 1.769832  | 1 | -4.536607 | 0.801714  | -0.853199 |
| 6      | 1.253722                | -0.524907 | 1.897889  | 1 | -3.283210 | 0.233571  | -1.954364 |
| 6      | -1.018967               | 0.334551  | 1.342581  | 1 | 2.921845  | 1.832737  | -0.020168 |
| 6      | -0.085047               | -0.672539 | 1.509649  | 1 | 1.448111  | 1.582201  | 1.914073  |
| 1      | -0.425820               | -1.678926 | 1.322418  | 1 | 3.002813  | 0.682879  | 2.155653  |
| 8      | 4.294004                | -0.328396 | -0.125187 | 8 | 0.438382  | -2.200541 | -2.102132 |
| 8      | -0.753529               | 0.109314  | -1.960540 | 6 | 1.005884  | -3.504788 | -2.140987 |
| 8      | 1.823848                | -1.716537 | 2.192895  | 1 | 1.199129  | -3.868967 | -1.131996 |
|        |                         |           |           | 1 | 0.267728  | -4.128787 | -2.628425 |
|        |                         |           |           | 1 | 1.928637  | -3.511391 | -2.716936 |
|        |                         |           |           | 1 | 2.958939  | -2.309536 | -1.127520 |





|    |           |           |           |   |           |           |           |
|----|-----------|-----------|-----------|---|-----------|-----------|-----------|
| 6  | 1.588892  | 2.235665  | -0.265214 | 1 | -4.993400 | 0.653012  | -0.651833 |
| 6  | 2.533984  | 1.184619  | 0.021359  | 1 | -4.682921 | -0.581883 | 0.592409  |
| 6  | 2.153007  | 0.130643  | 1.071826  | 1 | -3.866378 | 0.998661  | 0.693068  |
| 6  | 0.775529  | 0.238842  | 1.601964  | 1 | 2.850372  | 0.294504  | 1.915261  |
| 6  | 2.500730  | -1.314618 | 0.532766  | 1 | 2.206031  | -2.029150 | 1.311803  |
| 6  | 1.767371  | -1.569688 | -0.740323 | 1 | 3.585139  | -1.373758 | 0.396292  |
| 6  | -0.485820 | -1.466111 | 0.307468  | 8 | -0.552816 | 3.263868  | 0.116231  |
| 6  | 0.401083  | -1.505317 | -0.818507 | 6 | -0.185425 | 4.340007  | -0.762824 |
| 1  | -0.050189 | -1.447562 | -1.810222 | 1 | -0.012074 | 3.971262  | -1.785561 |
| 8  | 3.641981  | 1.118601  | -0.543133 | 1 | -1.039974 | 5.025767  | -0.752947 |
| 8  | -1.247145 | 1.462717  | 1.917667  | 1 | 0.714048  | 4.855813  | -0.393057 |
| 8  | 2.409267  | -1.708978 | -1.932681 | 1 | 1.920450  | 2.978902  | -0.991010 |
| 8  | -0.279866 | -2.356171 | 1.301807  | 9 | 0.638111  | -0.419258 | 2.814376  |
| 8  | -1.733914 | -1.025639 | 0.216479  |   |           |           |           |
| 6  | 3.851002  | -1.779789 | -1.973714 |   |           |           |           |
| 1  | 4.212546  | -2.661749 | -1.422424 |   |           |           |           |
| 1  | 4.091421  | -1.895895 | -3.036486 |   |           |           |           |
| 1  | 4.300989  | -0.856483 | -1.585278 |   |           |           |           |
| 6  | -1.295370 | -2.430297 | 2.340623  |   |           |           |           |
| 1  | -2.186871 | -2.939213 | 1.944978  |   |           |           |           |
| 1  | -0.836661 | -3.030109 | 3.134732  | 6 | -0.370541 | 1.107663  | 1.371041  |
| 1  | -1.552684 | -1.430508 | 2.707388  | 6 | -0.075661 | 2.267554  | 0.468980  |
| 14 | -2.781113 | -0.411782 | -1.002593 | 6 | 1.097484  | 2.432426  | -0.189730 |
| 6  | -1.997397 | 0.957162  | -2.008362 | 6 | 2.176803  | 1.490955  | -0.072038 |
| 1  | -1.047480 | 0.669827  | -2.480169 | 6 | 2.037956  | 0.344233  | 0.919375  |
| 1  | -2.692943 | 1.254010  | -2.810366 | 6 | 0.661558  | 0.119772  | 1.448391  |
| 1  | -1.818768 | 1.834802  | -1.373734 | 6 | 2.628993  | -0.941387 | 0.278675  |
| 6  | -3.239710 | -1.873150 | -2.088769 | 6 | 1.950093  | -1.152566 | -1.027038 |
| 1  | -2.379439 | -2.261116 | -2.656456 | 6 | -0.245568 | -1.435105 | 0.040861  |
| 1  | -3.652730 | -2.701559 | -1.491970 | 6 | 0.602112  | -1.229088 | -1.105733 |
| 1  | -4.006707 | -1.571276 | -2.820544 | 1 | 0.128470  | -1.163381 | -2.074878 |
| 6  | -4.218409 | 0.219639  | -0.000637 | 8 | 3.204749  | 1.598170  | -0.732968 |

TS2\_CI:

---

| Atomic | Coordinates (Angstroms) |   |   |
|--------|-------------------------|---|---|
| Number | X                       | Y | Z |

---

|    |           |           |           |    |           |           |           |
|----|-----------|-----------|-----------|----|-----------|-----------|-----------|
| 8  | -1.464852 | 1.045534  | 1.926485  | 1  | -0.084280 | 4.883593  | 0.005515  |
| 8  | 2.612245  | -1.104103 | -2.197343 | 1  | 1.278999  | 3.271286  | -0.844769 |
| 8  | 0.042811  | -2.504280 | 0.802407  | 17 | 0.702208  | -0.747720 | 2.983793  |
| 8  | -1.529117 | -1.139843 | 0.000477  |    |           |           |           |
| 6  | 4.038837  | -1.002999 | -2.211752 |    |           |           |           |
| 1  | 4.492938  | -1.877459 | -1.750154 |    |           |           |           |
| 1  | 4.303742  | -0.972187 | -3.260272 |    |           |           |           |
| 1  | 4.368313  | -0.091918 | -1.720627 |    |           |           |           |
| 6  | -1.008047 | -2.990690 | 1.656550  |    |           |           |           |
| 1  | -1.736595 | -3.532015 | 1.056688  |    |           |           |           |
| 1  | -0.520686 | -3.658897 | 2.353445  | 6  | 0.272345  | 0.511122  | -1.522933 |
| 1  | -1.496209 | -2.180352 | 2.186294  | 6  | -0.048433 | 1.965600  | -1.355490 |
| 14 | -2.621596 | -0.532822 | -1.151366 | 6  | -1.185107 | 2.425692  | -0.780485 |
| 6  | -2.011182 | 1.033920  | -1.940725 | 6  | -2.202868 | 1.539216  | -0.289523 |
| 1  | -0.960757 | 0.998729  | -2.227701 | 6  | -2.049546 | 0.042169  | -0.536820 |
| 1  | -2.587299 | 1.235856  | -2.844415 | 6  | -0.702307 | -0.401187 | -1.004427 |
| 1  | -2.152872 | 1.874482  | -1.265794 | 6  | -2.507911 | -0.711861 | 0.742630  |
| 6  | -2.836772 | -1.887382 | -2.411531 | 6  | -1.687678 | -0.213343 | 1.877937  |
| 1  | -1.936363 | -2.061330 | -2.998506 | 6  | 0.378175  | -1.082160 | 0.878527  |
| 1  | -3.102845 | -2.828835 | -1.933692 | 6  | -0.338375 | -0.271268 | 1.830459  |
| 1  | -3.634389 | -1.644374 | -3.112373 | 1  | 0.242140  | 0.282153  | 2.554778  |
| 6  | -4.134855 | -0.240135 | -0.132506 | 8  | -3.196942 | 1.956401  | 0.295352  |
| 1  | -4.942085 | 0.190718  | -0.721427 | 8  | 1.349375  | 0.199732  | -2.027830 |
| 1  | -4.501751 | -1.158816 | 0.319155  | 8  | -2.221932 | 0.468999  | 2.907582  |
| 1  | -3.895886 | 0.452754  | 0.672849  | 8  | 0.019673  | -2.379103 | 0.825469  |
| 1  | 2.690497  | 0.609395  | 1.755940  | 8  | 1.652525  | -0.874670 | 0.630774  |
| 1  | 2.449029  | -1.769329 | 0.961201  | 6  | -3.643562 | 0.555445  | 3.046480  |
| 1  | 3.698813  | -0.822545 | 0.161575  | 1  | -4.079988 | -0.435148 | 3.157225  |
| 8  | -1.100678 | 3.121102  | 0.426349  | 1  | -3.798254 | 1.118004  | 3.958143  |
| 6  | -0.937127 | 4.307266  | -0.346222 | 1  | -4.082497 | 1.080933  | 2.204073  |
| 1  | -0.809796 | 4.065087  | -1.400586 | 6  | 0.997434  | -3.304233 | 0.320174  |
| 1  | -1.849937 | 4.871032  | -0.205674 | 1  | 1.749914  | -3.487327 | 1.085665  |

TS2\_Br:

---

| Atomic | Coordinates (Angstroms) |   |   |
|--------|-------------------------|---|---|
| Number | X                       | Y | Z |

---

|    |           |           |           |    |           |           |           |
|----|-----------|-----------|-----------|----|-----------|-----------|-----------|
| 1  | 0.447168  | -4.210870 | 0.108540  | 6  | -0.139133 | -1.959540 | -0.261909 |
| 1  | 1.469625  | -2.931988 | -0.581617 | 6  | 1.069063  | -2.135700 | -1.159127 |
| 14 | 2.858736  | 0.209254  | 1.141780  | 6  | 1.467641  | -1.193112 | -2.036470 |
| 6  | 2.336968  | 1.977112  | 0.940898  | 6  | 0.758817  | 0.087209  | -2.117265 |
| 1  | 1.343169  | 2.190195  | 1.334167  | 6  | -0.679159 | 0.119782  | -1.572863 |
| 1  | 3.036997  | 2.628094  | 1.465520  | 6  | -0.760761 | -0.551215 | -0.183708 |
| 1  | 2.357069  | 2.251801  | -0.111326 | 6  | -1.254029 | 1.529944  | -1.623006 |
| 6  | 3.205599  | -0.213231 | 2.922381  | 6  | -0.878972 | 2.338339  | -0.416529 |
| 1  | 2.362314  | -0.016524 | 3.581836  | 6  | -0.020201 | 0.356462  | 0.873566  |
| 1  | 3.463282  | -1.265875 | 3.030118  | 6  | -0.367360 | 1.807905  | 0.694897  |
| 1  | 4.049392  | 0.362813  | 3.300338  | 1  | -0.177505 | 2.442301  | 1.556610  |
| 6  | 4.262174  | -0.221955 | 0.019545  | 8  | 1.252270  | 1.051328  | -2.673011 |
| 1  | 5.120604  | 0.426641  | 0.182443  | 8  | -0.559540 | -2.916309 | 0.336970  |
| 1  | 4.591685  | -1.250302 | 0.155414  | 8  | -1.189970 | 3.665678  | -0.408182 |
| 1  | 3.944120  | -0.108730 | -1.015519 | 8  | -0.330674 | 0.091098  | 2.209830  |
| 1  | -2.785908 | -0.186603 | -1.311691 | 8  | 1.339462  | 0.097596  | 0.619248  |
| 1  | -2.361002 | -1.778001 | 0.582964  | 6  | -1.081890 | 4.371471  | -1.634529 |
| 1  | -3.564696 | -0.531615 | 0.897932  | 1  | -1.866706 | 4.077377  | -2.340273 |
| 8  | 0.911605  | 2.735039  | -1.870581 | 1  | -1.208264 | 5.424620  | -1.382115 |
| 6  | 0.723624  | 4.146126  | -1.824632 | 1  | -0.096761 | 4.219465  | -2.091349 |
| 1  | 0.683987  | 4.498844  | -0.794677 | 6  | 0.016179  | -1.173001 | 2.757356  |
| 1  | 1.585563  | 4.567575  | -2.325002 | 1  | 0.964486  | -1.539718 | 2.349631  |
| 1  | -0.186612 | 4.431862  | -2.346963 | 1  | 0.124513  | -1.012566 | 3.832035  |
| 1  | -1.387066 | 3.480385  | -0.663478 | 1  | -0.773143 | -1.906933 | 2.571282  |
| 35 | -0.834312 | -2.038757 | -2.060236 | 14 | 2.687288  | 1.018912  | 1.067793  |

TS2\_I:

---

| Atomic | Coordinates (Angstroms) |   |   |
|--------|-------------------------|---|---|
| Number | X                       | Y | Z |

---

|   |          |          |           |
|---|----------|----------|-----------|
| 6 | 2.745937 | 2.659995 | 0.165182  |
| 1 | 2.046901 | 3.390876 | 0.583025  |
| 1 | 3.757544 | 3.080434 | 0.227170  |
| 1 | 2.497755 | 2.520959 | -0.893465 |
| 6 | 2.684030 | 1.258621 | 2.926806  |
| 1 | 1.779913 | 1.783378 | 3.254310  |
| 1 | 2.716530 | 0.296033 | 3.449510  |

|    |           |           |           |    |           |           |           |
|----|-----------|-----------|-----------|----|-----------|-----------|-----------|
| 1  | 3.553064  | 1.846527  | 3.244758  | 6  | 0.628795  | 1.786962  | 0.880451  |
| 6  | 4.090106  | -0.086660 | 0.501358  | 1  | 1.501110  | 2.370912  | 0.609348  |
| 1  | 5.065940  | 0.302461  | 0.812343  | 6  | -0.604042 | 2.354601  | 0.673611  |
| 1  | 3.976683  | -1.095911 | 0.913814  | 6  | -1.895972 | 1.614643  | 0.718832  |
| 1  | 4.089487  | -0.160837 | -0.592642 | 1  | -2.741920 | 2.271789  | 0.929421  |
| 1  | -1.249894 | -0.510096 | -2.270126 | 1  | -1.843884 | 0.871331  | 1.513364  |
| 1  | -2.349157 | 1.491128  | -1.687133 | 8  | -0.565210 | 3.634165  | 0.305965  |
| 1  | -0.883570 | 2.001201  | -2.537165 | 8  | 0.007428  | -0.246331 | 1.935455  |
| 8  | 1.650341  | -3.315813 | -0.949741 | 6  | 0.260077  | -1.655447 | 2.128639  |
| 6  | 2.798933  | -3.619701 | -1.723940 | 1  | -0.689724 | -2.058609 | 2.477717  |
| 1  | 3.595240  | -2.891582 | -1.531252 | 1  | 1.035862  | -1.777470 | 2.887369  |
| 1  | 3.116671  | -4.612285 | -1.408838 | 1  | 0.562474  | -2.111028 | 1.183142  |
| 1  | 2.551654  | -3.625593 | -2.791434 | 8  | 1.989617  | -0.147781 | 0.990644  |
| 1  | 2.355002  | -1.290773 | -2.652158 | 14 | 3.247738  | -0.132255 | -0.243082 |
| 53 | -2.852806 | -0.768843 | 0.381406  | 6  | -1.749180 | 4.308383  | -0.115438 |

5) *Isoflaviolin* (N2) exo structures.

Int1\_F:

| Atomic | Coordinates (Angstroms) |           |           |
|--------|-------------------------|-----------|-----------|
| Number | X                       | Y         | Z         |
| 6      | -2.829449               | -1.560412 | -0.057443 |
| 6      | -1.572657               | -1.948075 | -0.423629 |
| 6      | -0.508462               | -1.031218 | -1.000641 |
| 6      | -0.985513               | 0.233671  | -1.223735 |
| 6      | -3.264262               | -0.185938 | -0.232109 |
| 6      | -2.200115               | 0.832078  | -0.640848 |
| 8      | -4.402027               | 0.197290  | 0.002668  |
| 8      | 0.653505                | -1.489068 | -1.233169 |
| 6      | 0.875452                | 0.433703  | 1.227867  |

|    |           |           |           |
|----|-----------|-----------|-----------|
| 1  | 0.628795  | 1.786962  | 0.880451  |
| 6  | 1.501110  | 2.370912  | 0.609348  |
| 6  | -0.604042 | 2.354601  | 0.673611  |
| 6  | -1.895972 | 1.614643  | 0.718832  |
| 1  | -2.741920 | 2.271789  | 0.929421  |
| 1  | -1.843884 | 0.871331  | 1.513364  |
| 8  | -0.565210 | 3.634165  | 0.305965  |
| 8  | 0.007428  | -0.246331 | 1.935455  |
| 6  | 0.260077  | -1.655447 | 2.128639  |
| 1  | -0.689724 | -2.058609 | 2.477717  |
| 1  | 1.035862  | -1.777470 | 2.887369  |
| 1  | 0.562474  | -2.111028 | 1.183142  |
| 8  | 1.989617  | -0.147781 | 0.990644  |
| 14 | 3.247738  | -0.132255 | -0.243082 |
| 6  | -1.749180 | 4.308383  | -0.115438 |
| 1  | -2.249965 | 3.758513  | -0.915344 |
| 1  | -1.407404 | 5.271416  | -0.491227 |
| 1  | -2.429405 | 4.462868  | 0.726814  |
| 6  | 3.625403  | -1.934002 | -0.482052 |
| 1  | 4.479145  | -2.062055 | -1.157617 |
| 1  | 2.746717  | -2.421573 | -0.915398 |
| 1  | 3.875419  | -2.413211 | 0.470958  |
| 6  | 4.622688  | 0.756529  | 0.675245  |
| 1  | 4.850880  | 0.265472  | 1.627310  |
| 1  | 4.361152  | 1.800022  | 0.885485  |
| 1  | 5.539491  | 0.762148  | 0.074199  |
| 6  | 2.769230  | 0.784664  | -1.782595 |
| 1  | 2.416685  | 1.803410  | -1.594974 |
| 1  | 1.981886  | 0.233001  | -2.300952 |
| 1  | 3.660391  | 0.848885  | -2.420861 |
| 1  | -2.663452 | 1.539560  | -1.337704 |
| 9  | -0.182658 | 1.170717  | -1.822435 |

|   |           |           |           |
|---|-----------|-----------|-----------|
| 1 | -3.575883 | -2.250781 | 0.317905  |
| 8 | -1.123387 | -3.201185 | -0.320384 |
| 6 | -2.011549 | -4.197229 | 0.150736  |
| 1 | -2.889695 | -4.273527 | -0.499601 |
| 1 | -1.450689 | -5.131058 | 0.128998  |
| 1 | -2.335672 | -3.979095 | 1.175931  |

Int1\_Cl:

-----

| Atomic | Coordinates (Angstroms) |   |   |
|--------|-------------------------|---|---|
| Number | X                       | Y | Z |

-----

|   |           |           |           |
|---|-----------|-----------|-----------|
| 6 | -2.132851 | 2.260183  | -0.046534 |
| 6 | -0.915656 | 2.239414  | 0.560578  |
| 6 | -0.287851 | 1.024877  | 1.181147  |
| 6 | -1.144032 | -0.069834 | 1.183880  |
| 6 | -2.942533 | 1.077658  | -0.156681 |
| 6 | -2.367236 | -0.224644 | 0.396300  |
| 8 | -4.035207 | 1.061531  | -0.711092 |
| 8 | 0.871194  | 1.104951  | 1.649838  |
| 6 | 0.647135  | -0.432397 | -1.263452 |
| 6 | 0.200657  | -1.734175 | -1.000436 |
| 1 | 0.964235  | -2.450439 | -0.725601 |
| 6 | -1.109062 | -2.131447 | -0.868717 |
| 6 | -2.248049 | -1.205086 | -0.890418 |
| 1 | -3.197147 | -1.725505 | -0.990638 |
| 1 | -2.155173 | -0.564385 | -1.762323 |
| 8 | -1.265258 | -3.437382 | -0.614602 |
| 8 | -0.121366 | 0.415983  | -1.931906 |
| 6 | 0.440927  | 1.710645  | -2.227433 |
| 1 | -0.390288 | 2.283006  | -2.628062 |
| 1 | 1.226285  | 1.602989  | -2.975809 |

|    |           |           |           |
|----|-----------|-----------|-----------|
| 1  | 0.842424  | 2.175478  | -1.329362 |
| 8  | 1.839049  | -0.016448 | -1.012789 |
| 14 | 3.188039  | -0.410588 | 0.019886  |
| 6  | -2.509659 | -3.888905 | -0.073753 |
| 1  | -2.793460 | -3.280267 | 0.785329  |
| 1  | -2.326767 | -4.911095 | 0.242959  |
| 1  | -3.292679 | -3.877487 | -0.832203 |
| 6  | 3.825474  | 1.262945  | 0.463926  |
| 1  | 4.703383  | 1.199695  | 1.112305  |
| 1  | 3.050620  | 1.817638  | 0.999748  |
| 1  | 4.114826  | 1.832502  | -0.422564 |
| 6  | 4.300494  | -1.307093 | -1.174125 |
| 1  | 4.531875  | -0.695147 | -2.048738 |
| 1  | 3.848557  | -2.234351 | -1.535113 |
| 1  | 5.251153  | -1.576379 | -0.706858 |
| 6  | 2.736571  | -1.474637 | 1.454484  |
| 1  | 2.278452  | -2.424208 | 1.174464  |
| 1  | 2.054761  | -0.943968 | 2.118733  |
| 1  | 3.647944  | -1.715174 | 2.012202  |
| 1  | -3.150069 | -0.685224 | 1.007632  |
| 17 | -0.703539 | -1.484173 | 2.106910  |
| 1  | -2.551510 | 3.162015  | -0.477635 |
| 8  | -0.112236 | 3.305295  | 0.672539  |
| 6  | -0.597900 | 4.545627  | 0.177826  |
| 1  | -1.546591 | 4.809619  | 0.648553  |
| 1  | 0.159327  | 5.283028  | 0.428224  |
| 1  | -0.730515 | 4.506613  | -0.906586 |

Int1\_Br:

-----

| Atomic | Coordinates (Angstroms) |  |  |
|--------|-------------------------|--|--|
|--------|-------------------------|--|--|

| Number | X         | Y         | Z         |
|--------|-----------|-----------|-----------|
| 6      | 0.371545  | 3.088510  | -0.081122 |
| 6      | 1.086793  | 2.221224  | 0.684262  |
| 6      | 0.553055  | 0.932700  | 1.237877  |
| 6      | -0.786636 | 0.727404  | 0.929050  |
| 6      | -0.935480 | 2.747110  | -0.569020 |
| 6      | -1.627135 | 1.516189  | 0.023155  |
| 8      | -1.499219 | 3.385057  | -1.453284 |
| 8      | 1.310485  | 0.213472  | 1.925099  |
| 6      | 0.365858  | -0.576441 | -1.455147 |
| 6      | -0.832461 | -1.289604 | -1.318984 |
| 1      | -0.746786 | -2.353065 | -1.139136 |
| 6      | -2.082163 | -0.726837 | -1.249997 |
| 6      | -2.327241 | 0.723688  | -1.182940 |
| 1      | -3.391618 | 0.937078  | -1.168059 |
| 1      | -1.948901 | 1.191618  | -2.092837 |
| 8      | -3.080825 | -1.618523 | -1.188734 |
| 8      | 0.351358  | 0.602085  | -2.059811 |
| 6      | 1.624098  | 1.210051  | -2.355056 |
| 1      | 1.375319  | 2.211556  | -2.692559 |
| 1      | 2.116748  | 0.646713  | -3.146868 |
| 1      | 2.260055  | 1.240962  | -1.473111 |
| 8      | 1.533457  | -1.046018 | -1.168841 |
| 14     | 2.170142  | -2.329691 | -0.168304 |
| 6      | -4.379915 | -1.199114 | -0.765250 |
| 1      | -4.316856 | -0.664515 | 0.183201  |
| 1      | -4.941412 | -2.118735 | -0.630843 |
| 1      | -4.862640 | -0.586276 | -1.527441 |
| 6      | 3.706465  | -1.535830 | 0.474969  |
| 1      | 4.265626  | -2.204371 | 1.133483  |
| 1      | 3.427450  | -0.651567 | 1.056240  |

  

| Int1_I: |                         |           |           |
|---------|-------------------------|-----------|-----------|
| Atomic  | Coordinates (Angstroms) |           |           |
| Number  | X                       | Y         | Z         |
| 6       | 1.183595                | -2.963492 | 0.075743  |
| 6       | 1.550630                | -2.003831 | -0.815068 |
| 6       | 0.678237                | -0.862254 | -1.246221 |
| 6       | -0.597829               | -0.916809 | -0.698305 |
| 6       | -0.028755               | -2.845950 | 0.829351  |
| 6       | -1.073407               | -1.830853 | 0.349863  |
| 8       | -0.252285               | -3.520074 | 1.831794  |
| 8       | 1.133511                | -0.037513 | -2.073072 |

|    |           |           |           |    |           |           |           |
|----|-----------|-----------|-----------|----|-----------|-----------|-----------|
| 6  | 0.685844  | 0.605602  | 1.559257  | 53 | -2.095789 | 0.268368  | -1.610476 |
| 6  | -0.629740 | 1.076713  | 1.619769  | 1  | 1.852571  | -3.756240 | 0.374643  |
| 1  | -0.771017 | 2.136956  | 1.483959  | 8  | 2.741013  | -1.963958 | -1.425672 |
| 6  | -1.750874 | 0.293922  | 1.732730  | 6  | 3.623858  | -3.051191 | -1.193713 |
| 6  | -1.771277 | -1.178297 | 1.623330  | 1  | 3.166004  | -3.992556 | -1.495539 |
| 1  | -2.790505 | -1.536515 | 1.688884  | 1  | 4.501876  | -2.862374 | -1.799630 |
| 1  | -1.253866 | -1.612215 | 2.478052  | 1  | 3.908862  | -3.115038 | -0.142681 |
| 8  | -2.873174 | 0.997824  | 1.927012  |    |           |           |           |
| 8  | 0.974799  | -0.558291 | 2.114898  |    |           |           |           |
| 6  | 2.360719  | -0.940220 | 2.172684  |    |           |           |           |
| 1  | 2.349895  | -1.969209 | 2.510291  |    |           |           |           |
| 1  | 2.879255  | -0.307567 | 2.887821  |    |           |           |           |
| 1  | 2.831442  | -0.859392 | 1.198114  |    |           |           |           |
| 8  | 1.691646  | 1.291827  | 1.136676  |    |           |           |           |
| 14 | 1.914148  | 2.674435  | 0.109524  | 6  | -3.168624 | 0.411759  | -0.049068 |
| 6  | -4.148439 | 0.388853  | 1.725315  | 6  | -2.656487 | -0.807088 | -0.349729 |
| 1  | -4.197076 | -0.070633 | 0.739102  | 6  | -1.292286 | -0.972012 | -0.903744 |
| 1  | -4.860824 | 1.202329  | 1.788726  | 6  | -0.368659 | 0.215922  | -0.755637 |
| 1  | -4.368134 | -0.342680 | 2.500296  | 6  | -2.373558 | 1.624122  | -0.123703 |
| 6  | 3.448948  | 2.183736  | -0.794721 | 6  | -1.050223 | 1.568936  | -0.884078 |
| 1  | 3.754087  | 2.947080  | -1.507771 | 8  | -2.799588 | 2.699265  | 0.347285  |
| 1  | 3.240744  | 1.267697  | -1.349314 | 8  | -0.917260 | -2.024908 | -1.435104 |
| 1  | 4.281490  | 2.008485  | -0.114355 | 6  | 0.504570  | 0.087649  | 0.526944  |
| 6  | 2.157565  | 4.050329  | 1.339373  | 6  | 1.452984  | 1.219615  | 0.629725  |
| 1  | 2.988804  | 3.852002  | 2.013801  | 1  | 2.390231  | 1.085530  | 1.143939  |
| 1  | 1.264933  | 4.201203  | 1.945517  | 6  | 1.142365  | 2.418012  | 0.132241  |
| 1  | 2.365301  | 4.990904  | 0.830937  | 6  | -0.128673 | 2.760072  | -0.583266 |
| 6  | 0.486178  | 2.966082  | -1.015901 | 1  | 0.148187  | 3.239485  | -1.521571 |
| 1  | -0.450871 | 3.192786  | -0.512229 | 1  | -0.705710 | 3.496838  | -0.014625 |
| 1  | 0.343473  | 2.094705  | -1.654810 | 8  | 2.125262  | 3.410333  | 0.189079  |
| 1  | 0.732148  | 3.817388  | -1.652735 | 8  | -0.482287 | 0.216391  | 1.629361  |
| 1  | -1.865449 | -2.465248 | -0.063212 | 6  | -0.910897 | -1.020709 | 2.280673  |

Int2\_F:

---

| Atomic | Coordinates (Angstroms) |   |   |
|--------|-------------------------|---|---|
| Number | X                       | Y | Z |

---

|    |           |           |           | -----  |                         |           |           |
|----|-----------|-----------|-----------|--------|-------------------------|-----------|-----------|
|    |           |           |           | Atomic | Coordinates (Angstroms) |           |           |
|    |           |           |           | Number | X                       | Y         | Z         |
|    |           |           |           | -----  |                         |           |           |
| 1  | -1.872436 | -0.773527 | 2.720467  |        |                         |           |           |
| 1  | -0.194456 | -1.308675 | 3.043748  |        |                         |           |           |
| 1  | -1.022139 | -1.841649 | 1.575339  |        |                         |           |           |
| 8  | 1.076842  | -1.175541 | 0.577617  |        |                         |           |           |
| 14 | 2.532161  | -1.968375 | 0.009019  | 6      | -0.522281               | 2.941514  | -0.190915 |
| 6  | 1.704455  | 4.811855  | 0.250923  | 6      | 0.632576                | 2.505308  | 0.355838  |
| 1  | 1.059394  | 5.066331  | -0.584847 | 6      | 0.778038                | 1.136589  | 0.922337  |
| 1  | 2.626051  | 5.368903  | 0.203575  | 6      | -0.395361               | 0.194391  | 0.732592  |
| 1  | 1.187682  | 4.999138  | 1.190098  | 6      | -1.728229               | 2.127070  | -0.207364 |
| 6  | 2.003350  | -3.760773 | 0.224732  | 6      | -1.734132               | 0.925575  | 0.731804  |
| 1  | 2.810666  | -4.474109 | 0.075143  | 8      | -2.715175               | 2.456897  | -0.836412 |
| 1  | 1.201243  | -3.994674 | -0.476251 | 8      | 1.811979                | 0.793536  | 1.449602  |
| 1  | 1.595827  | -3.887826 | 1.226654  | 6      | -0.239161               | -0.631303 | -0.604963 |
| 6  | 3.932829  | -1.424402 | 1.169007  | 6      | -1.454362               | -1.453599 | -0.838398 |
| 1  | 3.838358  | -1.809346 | 2.182027  | 1      | -1.317272               | -2.314538 | -1.479366 |
| 1  | 3.951432  | -0.336902 | 1.230532  | 6      | -2.660760               | -1.142853 | -0.370611 |
| 1  | 4.905583  | -1.727802 | 0.782441  | 6      | -2.930297               | 0.009531  | 0.527475  |
| 6  | 2.970791  | -1.412285 | -1.739077 | 1      | -3.268340               | -0.359021 | 1.501743  |
| 1  | 2.956775  | -0.323132 | -1.762038 | 1      | -3.740953               | 0.622513  | 0.122096  |
| 1  | 2.272645  | -1.764167 | -2.494614 | 8      | -3.702927               | -1.944996 | -0.738417 |
| 1  | 3.974578  | -1.735205 | -2.016763 | 8      | -0.213456               | 0.341999  | -1.672870 |
| 1  | -1.331880 | 1.650946  | -1.938629 | 6      | 1.048756                | 0.704340  | -2.191780 |
| 9  | 0.568177  | 0.134339  | -1.877990 | 1      | 0.844419                | 1.493740  | -2.915930 |
| 1  | -4.173883 | 0.551310  | 0.311629  | 1      | 1.533616                | -0.135817 | -2.696883 |
| 8  | -3.279291 | -2.006659 | -0.183577 | 1      | 1.739073                | 1.097401  | -1.434967 |
| 6  | -4.624804 | -2.035955 | 0.390638  | 8      | 0.868701                | -1.425292 | -0.630139 |
| 1  | -5.360668 | -1.836602 | -0.381610 | 14     | 2.407336                | -1.909815 | -0.201001 |
| 1  | -4.725446 | -3.039073 | 0.781645  | 6      | -4.932121               | -1.831301 | -0.040633 |
| 1  | -4.708113 | -1.316967 | 1.202596  | 1      | -4.811654               | -2.027956 | 1.027358  |
|    |           |           |           | 1      | -5.575625               | -2.595633 | -0.468959 |
|    |           |           |           | 1      | -5.399048               | -0.854274 | -0.184871 |
|    |           |           |           | 6      | 3.708373                | -0.624762 | -0.571837 |

Int2\_Cl:





|    |           |           |           |    |           |           |           |
|----|-----------|-----------|-----------|----|-----------|-----------|-----------|
| 1  | 3.365247  | -3.226601 | 1.305880  | 8  | 0.731610  | -0.436055 | -1.870641 |
| 1  | -1.779763 | 1.494938  | 1.551210  | 6  | 1.175264  | -1.765009 | -2.096495 |
| 35 | -0.559222 | -1.072819 | 2.013771  | 1  | 2.024986  | -1.673901 | -2.777093 |
| 1  | -0.220713 | 4.096353  | -0.543992 | 1  | 0.390080  | -2.361554 | -2.571896 |
| 8  | 2.049824  | 3.077193  | 0.581237  | 1  | 1.490576  | -2.277303 | -1.181222 |
| 6  | 2.194448  | 4.420651  | 0.133485  | 8  | -0.845936 | -1.388177 | -0.499483 |
| 1  | 1.527599  | 5.087320  | 0.683130  | 14 | -2.395879 | -1.998308 | -0.767632 |
| 1  | 3.229712  | 4.682319  | 0.330862  | 6  | -2.127679 | 4.215005  | -0.917028 |
| 1  | 1.991414  | 4.492165  | -0.937451 | 1  | -2.623121 | 3.916688  | 0.015500  |

Int2\_l:

---

| Atomic | Coordinates (Angstroms) |   |   |
|--------|-------------------------|---|---|
| Number | X                       | Y | Z |

---

|   |           |           |           |    |           |           |           |
|---|-----------|-----------|-----------|----|-----------|-----------|-----------|
| 6 | 3.322340  | 0.507820  | -0.642775 | 1  | -2.072164 | -3.547420 | 1.126795  |
| 6 | 3.036588  | -0.572439 | 0.112603  | 1  | -1.554954 | -4.300422 | -0.389080 |
| 6 | 1.696047  | -0.758334 | 0.791185  | 6  | -2.700074 | -2.198187 | -2.612209 |
| 6 | 0.610527  | 0.265451  | 0.449943  | 1  | -1.973178 | -2.886041 | -3.058143 |
| 6 | 2.353136  | 1.602289  | -0.812246 | 1  | -2.651267 | -1.254589 | -3.165797 |
| 6 | 1.201761  | 1.660337  | 0.203314  | 1  | -3.697351 | -2.624783 | -2.775781 |
| 8 | 2.530722  | 2.481847  | -1.629466 | 6  | -3.727217 | -0.926095 | 0.003983  |
| 8 | 1.522552  | -1.702175 | 1.519357  | 1  | -3.652462 | 0.124990  | -0.292505 |
| 6 | -0.201558 | -0.211735 | -0.818665 | 1  | -3.675530 | -0.969710 | 1.096566  |
| 6 | -1.104728 | 0.880422  | -1.316106 | 1  | -4.713116 | -1.296497 | -0.303570 |
| 1 | -1.882919 | 0.587570  | -2.014943 | 1  | 1.694808  | 1.976333  | 1.134219  |
| 6 | -0.925205 | 2.175496  | -1.053566 | 1  | 4.256991  | 0.620910  | -1.181206 |
| 6 | 0.157759  | 2.713345  | -0.162851 | 8  | 3.838552  | -1.614498 | 0.340265  |
| 1 | -0.283346 | 3.120383  | 0.754968  | 6  | 5.124438  | -1.587104 | -0.254995 |
| 1 | 0.667241  | 3.532770  | -0.681824 | 1  | 5.692381  | -0.716701 | 0.092536  |
| 8 | -1.743171 | 3.076678  | -1.670654 | 1  | 5.618259  | -2.505110 | 0.059980  |
|   |           |           |           | 1  | 5.041939  | -1.561728 | -1.347874 |
|   |           |           |           | 53 | -0.733061 | 0.363916  | 2.175087  |

π\_complex\_F:

---

| Atomic Number | Coordinates (Angstroms) |           |           |
|---------------|-------------------------|-----------|-----------|
|               | X                       | Y         | Z         |
| 6             | 1.994646                | 2.160017  | 0.123371  |
| 6             | 0.794897                | 2.065138  | -0.486289 |
| 6             | 0.487573                | 0.965988  | -1.441289 |
| 6             | 1.574131                | 0.005476  | -1.650896 |
| 6             | 3.059681                | 1.194559  | -0.136704 |
| 6             | 2.770983                | 0.096216  | -1.061576 |
| 8             | 4.166274                | 1.312297  | 0.380124  |
| 8             | -0.576468               | 0.907277  | -2.035613 |
| 6             | -0.692167               | -0.395584 | 1.069063  |
| 6             | -0.030272               | -1.455284 | 0.534280  |
| 1             | -0.507469               | -1.947625 | -0.302052 |
| 6             | 1.253165                | -1.990851 | 0.901388  |
| 6             | 2.172163                | -1.446110 | 1.722519  |
| 1             | 3.139914                | -1.896306 | 1.890778  |
| 1             | 1.962106                | -0.521622 | 2.237231  |
| 8             | 1.454936                | -3.147498 | 0.191037  |
| 8             | -0.174000               | 0.289349  | 2.100973  |
| 6             | -0.971667               | 1.335178  | 2.659600  |
| 1             | -0.338518               | 1.793804  | 3.414198  |
| 1             | -1.872903               | 0.931137  | 3.125399  |
| 1             | -1.254433               | 2.062913  | 1.900306  |
| 8             | -1.838106               | 0.084277  | 0.617618  |
| 14            | -3.134163               | -0.633095 | -0.238060 |
| 6             | 2.720985                | -3.762200 | 0.304942  |
| 1             | 3.516613                | -3.084492 | -0.020204 |
| 1             | 2.692345                | -4.631423 | -0.347862 |

|   |           |           |           |
|---|-----------|-----------|-----------|
| 1 | 2.920707  | -4.087001 | 1.330408  |
| 6 | -4.114544 | 0.866400  | -0.702483 |
| 1 | -5.047406 | 0.611491  | -1.210912 |
| 1 | -3.533782 | 1.501962  | -1.375613 |
| 1 | -4.371451 | 1.464487  | 0.174649  |
| 6 | -3.978578 | -1.725252 | 1.008648  |
| 1 | -4.306570 | -1.166098 | 1.887790  |
| 1 | -3.303728 | -2.512356 | 1.355320  |
| 1 | -4.857870 | -2.220588 | 0.588673  |
| 6 | -2.596816 | -1.606915 | -1.722477 |
| 1 | -2.240988 | -2.609609 | -1.478143 |
| 1 | -1.816715 | -1.089570 | -2.285931 |
| 1 | -3.450547 | -1.731422 | -2.396249 |
| 1 | 3.560045  | -0.621258 | -1.246945 |
| 9 | 1.280102  | -0.990130 | -2.491743 |
| 1 | 2.250607  | 2.958315  | 0.809424  |
| 8 | -0.238580 | 2.912950  | -0.365345 |
| 6 | 0.006130  | 4.104310  | 0.369762  |
| 1 | 0.843642  | 4.655243  | -0.064889 |
| 1 | -0.903996 | 4.692307  | 0.292314  |
| 1 | 0.223457  | 3.886483  | 1.419329  |

π\_complex\_Cl:

---

| Atomic Number | Coordinates (Angstroms) |           |           |
|---------------|-------------------------|-----------|-----------|
|               | X                       | Y         | Z         |
| 6             | -1.843494               | 2.341751  | -0.089550 |
| 6             | -0.682162               | 2.118657  | 0.559351  |
| 6             | -0.462454               | 0.907504  | 1.400897  |
| 6             | -1.599929               | -0.022841 | 1.471937  |



|    |           |           |           |
|----|-----------|-----------|-----------|
| 1  | 1.365744  | 0.914703  | 2.697850  |
| 8  | 1.667154  | -2.293244 | 1.722225  |
| 8  | -0.836872 | 1.124736  | 2.092687  |
| 6  | -1.882869 | 2.097341  | 2.142637  |
| 1  | -1.485964 | 2.899142  | 2.759480  |
| 1  | -2.780138 | 1.681078  | 2.604938  |
| 1  | -2.126917 | 2.463414  | 1.146023  |
| 8  | -2.149890 | 0.084774  | 0.608252  |
| 14 | -3.119361 | -1.134054 | -0.100204 |
| 6  | 2.994386  | -2.529693 | 2.140883  |
| 1  | 3.688187  | -1.830129 | 1.664032  |
| 1  | 3.230204  | -3.545063 | 1.830417  |
| 1  | 3.094071  | -2.452019 | 3.227891  |
| 6  | -4.246481 | -0.113607 | -1.155440 |
| 1  | -5.010304 | -0.718647 | -1.649874 |
| 1  | -3.672267 | 0.394622  | -1.934189 |
| 1  | -4.760972 | 0.653213  | -0.572353 |
| 6  | -3.968285 | -1.961561 | 1.332885  |
| 1  | -4.534649 | -1.253447 | 1.941913  |
| 1  | -3.238193 | -2.445688 | 1.986812  |
| 1  | -4.662895 | -2.737622 | 1.000809  |
| 6  | -2.160367 | -2.361910 | -1.105104 |
| 1  | -1.667884 | -3.130182 | -0.505872 |
| 1  | -1.406921 | -1.871574 | -1.725970 |
| 1  | -2.846562 | -2.881688 | -1.781740 |
| 1  | 3.548602  | 0.151237  | -0.258453 |
| 35 | 1.724364  | -1.655050 | -1.816512 |
| 1  | 1.257646  | 3.779529  | 0.242498  |
| 8  | -0.917592 | 2.777151  | -1.099790 |
| 6  | -1.026063 | 4.168754  | -0.829865 |
| 1  | -0.255618 | 4.721565  | -1.373560 |
| 1  | -2.009973 | 4.461846  | -1.185692 |

|   |           |          |          |
|---|-----------|----------|----------|
| 1 | -0.938051 | 4.380821 | 0.239031 |
|---|-----------|----------|----------|

$\pi_{\text{complex}_I}$ :

| -----  |                         |           |           |
|--------|-------------------------|-----------|-----------|
| Atomic | Coordinates (Angstroms) |           |           |
| Number | X                       | Y         | Z         |
| -----  |                         |           |           |
| 6      | 0.372869                | 3.067413  | -0.509974 |
| 6      | -0.367854               | 2.136702  | -1.141608 |
| 6      | 0.116459                | 0.739138  | -1.354173 |
| 6      | 1.473546                | 0.465168  | -0.865444 |
| 6      | 1.709961                | 2.760979  | -0.028726 |
| 6      | 2.205588                | 1.389755  | -0.230022 |
| 8      | 2.425979                | 3.615157  | 0.483184  |
| 8      | -0.581642               | -0.073323 | -1.937678 |
| 6      | -1.384872               | 0.164422  | 1.298745  |
| 6      | -0.255699               | -0.544059 | 1.552891  |
| 1      | -0.191453               | -1.522937 | 1.106853  |
| 6      | 0.894632                | -0.140262 | 2.309971  |
| 6      | 1.192457                | 1.090525  | 2.770942  |
| 1      | 2.110679                | 1.301116  | 3.291137  |
| 1      | 0.501551                | 1.899998  | 2.627771  |
| 8      | 1.729390                | -1.219408 | 2.435646  |
| 8      | -1.550938               | 1.394105  | 1.811036  |
| 6      | -2.799822               | 2.038684  | 1.570256  |
| 1      | -2.697394               | 3.024850  | 2.008543  |
| 1      | -3.615393               | 1.505184  | 2.055772  |
| 1      | -3.008931               | 2.111562  | 0.506570  |
| 8      | -2.380158               | -0.241407 | 0.537288  |
| 14     | -2.915911               | -1.769641 | 0.010040  |
| 6      | 2.995751                | -0.987778 | 3.013743  |

|    |           |           |           |    |           |           |           |
|----|-----------|-----------|-----------|----|-----------|-----------|-----------|
| 1  | 3.541902  | -0.216138 | 2.467039  | 6  | 0.631234  | -1.095413 | 1.092516  |
| 1  | 3.534687  | -1.927373 | 2.952850  | 6  | 1.051041  | 0.221574  | 1.358684  |
| 1  | 2.912569  | -0.686217 | 4.059900  | 6  | 3.255028  | -0.063116 | 0.281025  |
| 6  | -4.057358 | -1.273863 | -1.362696 | 6  | 2.185052  | 0.828934  | 0.823115  |
| 1  | -4.562145 | -2.132036 | -1.803149 | 8  | 4.380050  | 0.369360  | 0.070189  |
| 1  | -3.484167 | -0.779071 | -2.145727 | 8  | -0.463541 | -1.599857 | 1.400301  |
| 1  | -4.819165 | -0.578245 | -1.015029 | 6  | -0.879562 | 0.365593  | -1.137031 |
| 6  | -3.774404 | -2.516476 | 1.483978  | 6  | -0.670616 | 1.671739  | -0.744980 |
| 1  | -4.581953 | -1.886571 | 1.852523  | 1  | -1.519018 | 2.179297  | -0.306016 |
| 1  | -3.064549 | -2.661596 | 2.297847  | 6  | 0.543009  | 2.372729  | -0.725754 |
| 1  | -4.194854 | -3.492661 | 1.245491  | 6  | 1.807284  | 1.791221  | -0.908740 |
| 6  | -1.556397 | -2.875102 | -0.597410 | 1  | 2.684688  | 2.422978  | -0.979690 |
| 1  | -0.981840 | -3.332482 | 0.205056  | 1  | 1.838272  | 0.941149  | -1.574915 |
| 1  | -0.874348 | -2.329256 | -1.247512 | 8  | 0.387046  | 3.635728  | -0.265152 |
| 1  | -1.999430 | -3.682894 | -1.180300 | 8  | 0.023764  | -0.286478 | -1.869046 |
| 1  | 3.205846  | 1.200094  | 0.128382  | 6  | -0.266546 | -1.662955 | -2.179283 |
| 53 | 2.206268  | -1.482636 | -1.216212 | 1  | 0.648846  | -2.038408 | -2.628300 |
| 1  | 0.035918  | 4.082213  | -0.365455 | 1  | -1.087309 | -1.718243 | -2.895332 |
| 8  | -1.583311 | 2.324006  | -1.680626 | 1  | -0.512182 | -2.221587 | -1.277675 |
| 6  | -2.060247 | 3.662690  | -1.703811 | 8  | -1.973250 | -0.303006 | -0.911276 |
| 1  | -1.353133 | 4.314761  | -2.215453 | 14 | -3.292696 | -0.175634 | 0.196877  |
| 1  | -2.995858 | 3.639017  | -2.249890 | 6  | 1.542419  | 4.454583  | -0.140696 |
| 1  | -2.230214 | 4.042682  | -0.695315 | 1  | 2.250295  | 4.042493  | 0.580995  |

TS1\_F:

---

| Atomic | Coordinates (Angstroms) |           |           |
|--------|-------------------------|-----------|-----------|
| Number | X                       | Y         | Z         |
| 6      | 2.875027                | -1.431357 | -0.005238 |
| 6      | 1.674585                | -1.920502 | 0.390607  |

---

|   |           |           |           |
|---|-----------|-----------|-----------|
| 1 | 1.182845  | 5.413710  | 0.221445  |
| 1 | 2.032574  | 4.585411  | -1.108170 |
| 6 | -3.755378 | -1.952444 | 0.408174  |
| 1 | -4.644359 | -2.071394 | 1.032166  |
| 1 | -2.936065 | -2.494150 | 0.886357  |
| 1 | -3.959826 | -2.432952 | -0.551101 |
| 6 | -4.566394 | 0.797636  | -0.746640 |
| 1 | -4.801116 | 0.331606  | -1.705813 |
| 1 | -4.230230 | 1.816797  | -0.954979 |

|   |           |           |           |    |           |           |           |
|---|-----------|-----------|-----------|----|-----------|-----------|-----------|
| 1 | -5.501169 | 0.878825  | -0.185622 | 6  | -2.015672 | -1.448883 | -1.172397 |
| 6 | -2.833524 | 0.632404  | 1.790368  | 1  | -2.943429 | -1.983606 | -1.304734 |
| 1 | -2.538848 | 1.679371  | 1.706538  | 1  | -1.924568 | -0.592639 | -1.816654 |
| 1 | -2.019961 | 0.084798  | 2.267193  | 8  | -0.834300 | -3.479989 | -0.610764 |
| 1 | -3.701589 | 0.596739  | 2.456719  | 8  | 0.002267  | 0.459644  | -1.919478 |
| 1 | 2.559947  | 1.703723  | 1.344520  | 6  | 0.462623  | 1.794334  | -2.197495 |
| 9 | 0.221894  | 1.017518  | 2.089264  | 1  | -0.409467 | 2.308982  | -2.580925 |
| 1 | 3.635598  | -2.042171 | -0.476371 | 1  | 1.244635  | 1.770310  | -2.949642 |
| 8 | 1.264019  | -3.183751 | 0.226996  | 1  | 0.823243  | 2.273714  | -1.292997 |
| 6 | 2.174217  | -4.084304 | -0.389249 | 8  | 1.997728  | 0.171161  | -1.002430 |
| 1 | 3.093518  | -4.165144 | 0.193640  | 14 | 3.323969  | -0.127690 | 0.064135  |
| 1 | 1.665900  | -5.044245 | -0.417254 | 6  | -2.086839 | -4.134487 | -0.441588 |
| 1 | 2.413918  | -3.761283 | -1.405359 | 1  | -2.673277 | -3.648060 | 0.335268  |

TS1\_Cl:

-----

| Atomic | Coordinates (Angstroms) |   |   |
|--------|-------------------------|---|---|
| Number | X                       | Y | Z |

-----

|   |           |           |           |
|---|-----------|-----------|-----------|
| 6 | -2.480606 | 1.940684  | -0.142587 |
| 6 | -1.285304 | 2.123397  | 0.464098  |
| 6 | -0.539356 | 1.033633  | 1.185812  |
| 6 | -1.270761 | -0.173566 | 1.297470  |
| 6 | -3.161185 | 0.664629  | -0.072401 |
| 6 | -2.411400 | -0.472912 | 0.548470  |
| 8 | -4.292118 | 0.495797  | -0.507543 |
| 8 | 0.588036  | 1.266142  | 1.643226  |
| 6 | 0.828209  | -0.342223 | -1.247763 |
| 6 | 0.455241  | -1.627684 | -0.921404 |
| 1 | 1.223260  | -2.255509 | -0.500190 |
| 6 | -0.832488 | -2.179830 | -0.975318 |

|    |           |           |           |
|----|-----------|-----------|-----------|
| 6  | -2.015672 | -1.448883 | -1.172397 |
| 1  | -2.943429 | -1.983606 | -1.304734 |
| 1  | -1.924568 | -0.592639 | -1.816654 |
| 8  | -0.834300 | -3.479989 | -0.610764 |
| 8  | 0.002267  | 0.459644  | -1.919478 |
| 6  | 0.462623  | 1.794334  | -2.197495 |
| 1  | -0.409467 | 2.308982  | -2.580925 |
| 1  | 1.244635  | 1.770310  | -2.949642 |
| 1  | 0.823243  | 2.273714  | -1.292997 |
| 8  | 1.997728  | 0.171161  | -1.002430 |
| 14 | 3.323969  | -0.127690 | 0.064135  |
| 6  | -2.086839 | -4.134487 | -0.441588 |
| 1  | -2.673277 | -3.648060 | 0.335268  |
| 1  | -1.849533 | -5.145811 | -0.139317 |
| 1  | -2.650045 | -4.156955 | -1.372360 |
| 6  | 3.811137  | 1.591478  | 0.537023  |
| 1  | 4.686460  | 1.598676  | 1.183780  |
| 1  | 2.987868  | 2.055201  | 1.079381  |
| 1  | 4.037066  | 2.203868  | -0.333460 |
| 6  | 4.559572  | -0.979216 | -1.033386 |
| 1  | 4.761637  | -0.404198 | -1.935070 |
| 1  | 4.202080  | -1.960143 | -1.344391 |
| 1  | 5.509799  | -1.129096 | -0.523978 |
| 6  | 2.855916  | -1.146211 | 1.528691  |
| 1  | 2.619309  | -2.184306 | 1.306683  |
| 1  | 2.007037  | -0.697137 | 2.041972  |
| 1  | 3.697814  | -1.148802 | 2.222705  |
| 1  | -3.066619 | -1.241742 | 0.933297  |
| 17 | -0.609369 | -1.449452 | 2.282905  |
| 1  | -3.015696 | 2.735464  | -0.638970 |
| 8  | -0.611721 | 3.280498  | 0.508647  |
| 6  | -1.237953 | 4.415419  | -0.075847 |

|   |           |          |           |
|---|-----------|----------|-----------|
| 1 | -2.207054 | 4.601261 | 0.382536  |
| 1 | -0.573348 | 5.249332 | 0.108494  |
| 1 | -1.369405 | 4.282137 | -1.150239 |

|    |           |           |           |
|----|-----------|-----------|-----------|
| 14 | 3.356709  | -0.458263 | -0.023230 |
| 6  | -2.556216 | -3.489671 | -1.375336 |
| 1  | -3.139866 | -3.017326 | -0.588161 |
| 1  | -2.485076 | -4.552028 | -1.186012 |
| 1  | -3.029208 | -3.320531 | -2.341063 |
| 6  | 4.103698  | 1.097047  | 0.642288  |
| 1  | 4.955446  | 0.894284  | 1.288914  |
| 1  | 3.359189  | 1.632335  | 1.229898  |
| 1  | 4.441902  | 1.753931  | -0.156795 |
| 6  | 4.470116  | -1.369587 | -1.200950 |
| 1  | 4.789606  | -0.734628 | -2.025125 |
| 1  | 3.970475  | -2.237077 | -1.630230 |
| 1  | 5.365637  | -1.731578 | -0.699092 |
| 6  | 2.686823  | -1.541388 | 1.308807  |
| 1  | 2.214374  | -2.456527 | 0.958692  |
| 1  | 1.962791  | -0.986230 | 1.903491  |
| 1  | 3.510281  | -1.831302 | 1.963244  |
| 1  | -3.217588 | -0.704039 | 0.398044  |
| 35 | -0.918879 | -1.663568 | 1.941026  |
| 1  | -2.421455 | 3.404050  | -0.489838 |
| 8  | -0.049236 | 3.348899  | 0.829554  |
| 6  | -0.439997 | 4.649205  | 0.405690  |
| 1  | -1.393425 | 4.929607  | 0.848224  |
| 1  | 0.337135  | 5.319294  | 0.749340  |
| 1  | -0.519997 | 4.698799  | -0.680051 |

TS1\_Br:

---

| Atomic | Coordinates (Angstroms) |           |           |
|--------|-------------------------|-----------|-----------|
| Number | X                       | Y         | Z         |
| 6      | -2.061308               | 2.462668  | -0.104237 |
| 6      | -0.896381               | 2.344027  | 0.573473  |
| 6      | -0.391778               | 1.049197  | 1.154917  |
| 6      | -1.312513               | -0.016092 | 1.031610  |
| 6      | -2.933473               | 1.322993  | -0.285962 |
| 6      | -2.420035               | -0.007334 | 0.179670  |
| 8      | -4.038670               | 1.410404  | -0.802802 |
| 8      | 0.716877                | 1.030112  | 1.706309  |
| 6      | 0.921894                | -0.110261 | -1.427806 |
| 6      | 0.343271                | -1.354356 | -1.309323 |
| 1      | 0.980482                | -2.145984 | -0.950573 |
| 6      | -1.001321               | -1.687898 | -1.521110 |
| 6      | -2.050322               | -0.762458 | -1.655974 |
| 1      | -3.032418               | -1.121893 | -1.921999 |
| 1      | -1.789394               | 0.157471  | -2.148523 |
| 8      | -1.215366               | -3.012167 | -1.370899 |
| 8      | 0.271432                | 0.892283  | -2.017569 |
| 6      | 0.951752                | 2.156804  | -2.097660 |
| 1      | 0.230845                | 2.826673  | -2.549329 |
| 1      | 1.835954                | 2.072304  | -2.721031 |
| 1      | 1.233445                | 2.504882  | -1.107802 |
| 8      | 2.130270                | 0.184056  | -1.052527 |

TS1\_I: -isoflaviolin-exo

---

| Atomic | Coordinates (Angstroms) |   |   |
|--------|-------------------------|---|---|
| Number | X                       | Y | Z |

---



|    |             |             |             |    |             |             |             |
|----|-------------|-------------|-------------|----|-------------|-------------|-------------|
| 6  | -3.08510000 | 0.39523500  | 0.07859780  | 1  | 3.89007000  | -2.89708000 | 0.96923300  |
| 6  | -2.30264000 | -0.26342100 | -0.80577500 | 1  | 4.39294000  | -1.21651000 | 0.83543800  |
| 6  | -1.07837000 | 0.33328000  | -1.45001000 | 1  | 4.91863000  | -2.38762000 | -0.36182700 |
| 6  | -0.88536000 | 1.70254000  | -1.14617000 | 6  | 2.84301000  | -0.29615100 | -1.92053000 |
| 6  | -2.80986000 | 1.77264000  | 0.42366600  | 1  | 3.28090000  | 0.58730100  | -1.46135000 |
| 6  | -1.53530000 | 2.36103000  | -0.10009800 | 1  | 1.89820000  | -0.01315740 | -2.38238000 |
| 6  | -3.56624000 | 2.44606000  | 1.11129000  | 1  | 3.52141000  | -0.62560700 | -2.70812000 |
| 6  | -0.40072000 | -0.37393500 | -2.20983000 | 1  | -1.56462000 | 3.44163000  | -0.12195800 |
| 6  | 0.82952600  | -0.34384900 | 0.98106500  | 53 | 0.59440400  | 2.76676000  | -2.22076000 |
| 6  | 1.39304000  | 0.91432400  | 0.99573800  | 1  | -3.97688000 | -0.03543910 | 0.50660200  |
| 1  | 2.38395000  | 0.99840900  | 0.58001300  | 8  | -2.51697000 | -1.51303000 | -1.24132000 |
| 6  | 0.79663400  | 2.10947000  | 1.42352000  | 6  | -3.68513000 | -2.16515000 | -0.76687800 |
| 6  | -0.57069000 | 2.28360000  | 1.68933000  | 1  | -4.58038000 | -1.60311000 | -1.03096000 |
| 1  | -0.90352600 | 3.21685000  | 2.11508000  | 1  | -3.70291000 | -3.13584000 | -1.24892000 |
| 1  | -1.07243000 | 1.42455000  | 2.09462000  | 1  | -3.65123000 | -2.29447000 | 0.31570400  |
| 8  | 1.66130000  | 3.14488000  | 1.36531000  |    |             |             |             |
| 8  | -0.30780700 | -0.58600100 | 1.62613000  |    |             |             |             |
| 6  | -0.83438300 | -1.91793000 | 1.55271000  |    |             |             |             |
| 1  | -1.82638000 | -1.84682000 | 1.98407000  |    |             |             |             |
| 1  | -0.21721200 | -2.59567000 | 2.13605000  |    |             |             |             |
| 1  | -0.88997100 | -2.26069000 | 0.52373200  |    |             |             |             |
| 8  | 1.35921000  | -1.38634000 | 0.41575200  |    |             |             |             |
| 14 | 2.57431000  | -1.70344000 | -0.76056400 | 6  | -2.929020   | 0.937030    | -0.014425   |
| 6  | 1.14969000  | 4.45983000  | 1.53558000  | 6  | -2.531172   | -0.249465   | -0.546217   |
| 1  | 0.39508300  | 4.68052000  | 0.78141000  | 6  | -1.185095   | -0.469624   | -1.150947   |
| 1  | 1.99576000  | 5.12317000  | 1.40345000  | 6  | -0.327824   | 0.637933    | -1.050006   |
| 1  | 0.73154800  | 4.59756000  | 2.53285000  | 6  | -2.032040   | 2.055914    | 0.123651    |
| 6  | 1.84993000  | -3.17938000 | -1.61319000 | 6  | -0.698204   | 1.996052    | -0.615002   |
| 1  | 2.50974000  | -3.55517000 | -2.39295000 | 8  | -2.310190   | 3.029568    | 0.813168    |
| 1  | 0.90688300  | -2.89152000 | -2.07749000 | 8  | -0.878454   | -1.571994   | -1.636556   |
| 1  | 1.65848000  | -3.99386000 | -0.91589100 | 6  | 0.666204    | -0.064969   | 0.948310    |
| 6  | 4.07858000  | -2.08941000 | 0.26382700  | 6  | 1.803131    | 0.751339    | 0.666707    |

TS2\_F:

| -----  |                         |           |           |
|--------|-------------------------|-----------|-----------|
| Atomic | Coordinates (Angstroms) |           |           |
| Number | X                       | Y         | Z         |
| -----  |                         |           |           |
| 6      | -2.929020               | 0.937030  | -0.014425 |
| 6      | -2.531172               | -0.249465 | -0.546217 |
| 6      | -1.185095               | -0.469624 | -1.150947 |
| 6      | -0.327824               | 0.637933  | -1.050006 |
| 6      | -2.032040               | 2.055914  | 0.123651  |
| 6      | -0.698204               | 1.996052  | -0.615002 |
| 8      | -2.310190               | 3.029568  | 0.813168  |
| 8      | -0.878454               | -1.571994 | -1.636556 |
| 6      | 0.666204                | -0.064969 | 0.948310  |
| 6      | 1.803131                | 0.751339  | 0.666707  |

|    |           |           |           |
|----|-----------|-----------|-----------|
| 1  | 2.761063  | 0.256577  | 0.556415  |
| 6  | 1.700852  | 2.057700  | 0.326208  |
| 6  | 0.396524  | 2.753018  | 0.216220  |
| 1  | 0.516397  | 3.756021  | -0.184239 |
| 1  | -0.021699 | 2.892477  | 1.215776  |
| 8  | 2.867018  | 2.681213  | 0.051588  |
| 8  | -0.270048 | 0.440194  | 1.777784  |
| 6  | -1.187277 | -0.492092 | 2.366173  |
| 1  | -2.014981 | 0.110980  | 2.731371  |
| 1  | -0.696800 | -1.008061 | 3.193318  |
| 1  | -1.535312 | -1.227629 | 1.640797  |
| 8  | 0.719145  | -1.370289 | 0.903318  |
| 14 | 1.703752  | -2.507691 | 0.054009  |
| 6  | 2.860160  | 3.971891  | -0.546441 |
| 1  | 2.330454  | 3.962569  | -1.501618 |
| 1  | 3.906555  | 4.209203  | -0.715489 |
| 1  | 2.426324  | 4.723810  | 0.114580  |
| 6  | 0.591591  | -3.981038 | -0.031071 |
| 1  | 1.078245  | -4.837285 | -0.503281 |
| 1  | -0.297994 | -3.729568 | -0.612964 |
| 1  | 0.272118  | -4.294162 | 0.965702  |
| 6  | 3.144527  | -2.782495 | 1.205568  |
| 1  | 2.818586  | -3.079915 | 2.205078  |
| 1  | 3.760427  | -1.886901 | 1.319809  |
| 1  | 3.800822  | -3.573030 | 0.832141  |
| 6  | 2.294776  | -1.898536 | -1.586464 |
| 1  | 2.825716  | -0.946791 | -1.528651 |
| 1  | 1.459088  | -1.769398 | -2.274642 |
| 1  | 2.986920  | -2.634635 | -2.008485 |
| 1  | -0.852295 | 2.596583  | -1.524004 |
| 9  | 0.745861  | 0.646857  | -1.902277 |
| 1  | -3.900709 | 1.063639  | 0.450522  |

|   |           |           |           |
|---|-----------|-----------|-----------|
| 8 | -3.275094 | -1.358009 | -0.593445 |
| 6 | -4.600431 | -1.272642 | -0.086724 |
| 1 | -5.167416 | -0.501657 | -0.612388 |
| 1 | -5.048008 | -2.246877 | -0.260314 |
| 1 | -4.591985 | -1.055557 | 0.984840  |

TS2\_CI:

| -----  |                         |           |           |
|--------|-------------------------|-----------|-----------|
| Atomic | Coordinates (Angstroms) |           |           |
| Number | X                       | Y         | Z         |
| -----  |                         |           |           |
| 6      | -1.973503               | -2.389250 | -0.114422 |
| 6      | -2.298242               | -1.224400 | 0.499510  |
| 6      | -1.289548               | -0.309486 | 1.116800  |
| 6      | 0.061316                | -0.728004 | 0.964675  |
| 6      | -0.602680               | -2.781832 | -0.338493 |
| 6      | 0.474616                | -2.065238 | 0.465152  |
| 8      | -0.310894               | -3.675379 | -1.121991 |
| 8      | -1.654141               | 0.743259  | 1.648344  |
| 6      | 0.458227                | 0.410347  | -0.945321 |
| 6      | 1.877864                | 0.364669  | -0.769751 |
| 1      | 2.417319                | 1.298726  | -0.735630 |
| 6      | 2.523602                | -0.785352 | -0.478747 |
| 6      | 1.837132                | -2.091296 | -0.298512 |
| 1      | 2.499973                | -2.794414 | 0.191080  |
| 1      | 1.626954                | -2.526968 | -1.276037 |
| 8      | 3.863716                | -0.679729 | -0.338635 |
| 8      | -0.064940               | -0.512917 | -1.787965 |
| 6      | -1.328163               | -0.208228 | -2.391914 |
| 1      | -1.671029               | -1.144439 | -2.816569 |
| 1      | -1.188309               | 0.535243  | -3.173387 |

1 -2.047508 0.166936 -1.667949  
 8 -0.221420 1.526778 -0.892652  
 14 -0.068561 3.085013 -0.191185  
 6 4.617287 -1.766311 0.187334  
 1 4.272699 -2.048774 1.179908  
 1 5.633458 -1.399677 0.256229  
 1 4.591472 -2.627470 -0.476431  
 6 -1.834644 3.621805 -0.081274  
 1 -1.924856 4.620818 0.341818  
 1 -2.392451 2.933045 0.551288  
 1 -2.305210 3.639329 -1.063053  
 6 0.891571 4.063561 -1.454121  
 1 0.407032 4.059994 -2.428823  
 1 1.899735 3.673803 -1.589006  
 1 0.993142 5.103473 -1.146234  
 6 0.810981 3.091876 1.431447  
 1 1.809123 2.661807 1.369910  
 1 0.255078 2.547453 2.190135  
 1 0.922756 4.126474 1.759463  
 1 0.611883 -2.709292 1.340419  
 17 1.152229 -0.131764 2.210697  
 1 -2.716408 -3.013422 -0.588533  
 8 -3.537528 -0.741289 0.628861  
 6 -4.604815 -1.553087 0.153084  
 1 -4.598994 -2.523540 0.646178  
 1 -5.512736 -1.017545 0.394749  
 1 -4.535507 -1.696198 -0.925164

TS2\_Br:

| -----  |                         |           |           |
|--------|-------------------------|-----------|-----------|
| Atomic | Coordinates (Angstroms) |           |           |
| Number | X                       | Y         | Z         |
| -----  |                         |           |           |
| 6      | -1.539225               | -2.756579 | -0.168382 |
| 6      | -2.036909               | -1.704893 | 0.526147  |
| 6      | -1.187780               | -0.602033 | 1.072615  |
| 6      | 0.196666                | -0.718736 | 0.772740  |
| 6      | -0.145377               | -2.845511 | -0.534003 |
| 6      | 0.831998                | -1.932487 | 0.199611  |
| 8      | 0.250400                | -3.646192 | -1.369377 |
| 8      | -1.716576               | 0.345040  | 1.660133  |
| 6      | 0.144883                | 0.474099  | -1.155522 |
| 6      | 1.550855                | 0.735028  | -1.131778 |
| 1      | 1.878700                | 1.763288  | -1.141600 |
| 6      | 2.455863                | -0.249430 | -0.936815 |
| 6      | 2.098688                | -1.668387 | -0.675043 |
| 1      | 2.943141                | -2.176577 | -0.224656 |
| 1      | 1.924238                | -2.183053 | -1.622462 |
| 8      | 3.749537                | 0.142522  | -0.962492 |
| 8      | -0.249911               | -0.549405 | -1.950792 |
| 6      | -1.598975               | -0.520489 | -2.435013 |
| 1      | -1.763659               | -1.500364 | -2.866477 |
| 1      | -1.695211               | 0.250404  | -3.196365 |
| 1      | -2.313969               | -0.325875 | -1.639880 |
| 8      | -0.754468               | 1.409982  | -1.011330 |
| 14     | -0.924283               | 2.986167  | -0.365602 |
| 6      | 4.778070                | -0.755672 | -0.562410 |



|   |           |           |           |    |           |           |           |
|---|-----------|-----------|-----------|----|-----------|-----------|-----------|
| 6 | -3.727217 | -0.926095 | 0.003983  | 8  | 3.838552  | -1.614498 | 0.340265  |
| 1 | -3.652462 | 0.124990  | -0.292505 | 6  | 5.124438  | -1.587104 | -0.254995 |
| 1 | -3.675530 | -0.969710 | 1.096566  | 1  | 5.692381  | -0.716701 | 0.092536  |
| 1 | -4.713116 | -1.296497 | -0.303570 | 1  | 5.618259  | -2.505110 | 0.059980  |
| 1 | 1.694808  | 1.976333  | 1.134219  | 1  | 5.041939  | -1.561728 | -1.347874 |
| 1 | 4.256991  | 0.620910  | -1.181206 | 53 | -0.733061 | 0.363916  | 2.175087  |

## References

1. Blatchly J. M., Green R. J. S., McOmie J. F. W., Searle J. B. Thiele acetylation of quinones. Part III. *p*-Benzoquinones with bromo- and methoxy-substituents. *J. Chem. Soc. C*, **1969**, 1353-1358.
2. Mohammed Hashmat A M., Niedbalski M., Bohnert G., Bryant D. Silica-Gel-Supported Ceric Ammonium Nitrate (CAN): A Simple and Efficient Solid-Supported Reagent for Oxidation of Oxygenated Aromatic Compounds to Quinones. *Synth. Commun.* **2006**, 36, 1751–1759.
3. Clive D. J., Khodabocus A., Vernon P. G., Angoh A.G., Bordeleau L., Middleton D. S., Lowe C., Kellner D. Model Studies Related to the Synthesis of Fredericamycin A. *J. Chem. Soc. Perkin Trans. 1* **1991**, 1433-1444.
4. Midland M. M., Koops R. W. Asymmetric Hetero-Diels-Alder Reaction of  $\alpha$ -Alkoxy Aldehydes with Cycloadditions Activated Dienes. The Scope of Lewis Acid Chelation-Controlled. *J. Org. Chem.*, **1990**, 55, (17), 5058-5065.
5. Jaroszewski, J. W., Oxidation of Some 2-Methoxyphenols with Chlorous Acid. *J. Org. Chem.*, **1982**, 47, (11), 2013-2018.
6. Grandmaison J. L., Brassard P., Reactions of ketene acetals—IX: The synthesis of naphthoquinones from benzoquinones. *Tetrahedron*, **1977**, 33, (16), 2047-2053.
